# Supplementary material for: Predicting Protein–Protein Interactions Between Rice and Blast Fungus Using Structure-Based Approaches
Source: Front Plant Sci. 2021 Jul 23;12:690124. doi: 10.3389/fpls.2021.690124 (PMC8343130; doi:10.3389/fpls.2021.690124)
Supplement: Supplementary Table 2 — The experimentally determined PPIs between Arabidopsis and pathogens. [file Table_2.XLSX]

## Sheet: Supplementary Table 2
Supplementary Table 2. The experimentally determined PPIs between Arabidopsis and pathogens.
InteractorA	InteractorB	AnnotationA	AnnotationB	Host	Pathogen	With interolog mapping	With interacting domains	Interaction score
A0JPW5	A0A088QF82	Heavy metal-associated isoprenylated plant protein 19	Effector protein OEC56	Arabidopsis thaliana	Golovinomyces orontii	N	N	0.1
O03042	P52231	Ribulose bisphosphate carboxylase large chain	Thioredoxin	Arabidopsis thaliana	Synechocystis sp	N	N	0.95
O22160	P0AA25	Thylakoid lumenal 15 kDa protein 1	Thioredoxin 1	Arabidopsis thaliana	Escherichia coli	N	N	0.91
O22456	Q2NJQ2	Developmental protein SEPALLATA 3	SVM_signal domain-containing protein	Arabidopsis thaliana	Aster yellows witches'-broom phytoplasma	N	N	0.81
O23016	A0A088QD79	Probable voltage-gated potassium channel subunit beta	Effector protein OEC55	Arabidopsis thaliana	Golovinomyces orontii	N	N	0
O48726	P48510	26S proteasome regulatory subunit RPN13	Ubiquitin domain-containing protein DSK2	Arabidopsis thaliana	Saccharomyces cerevisiae	N	N	0.99
O49484	Q8XRE0	SKP1-like protein 11	Lrr-gala family type III effector protein Gala1	Arabidopsis thaliana	Ralstonia solanacearum	N	N	0.59
O49484	Q8XYF7	SKP1-like protein 11	Probable lrr-gala family type III effector protein Gala5	Arabidopsis thaliana	Ralstonia solanacearum	N	N	0.61
O49484	Q8XZN8	SKP1-like protein 11	Lrr-gala family type III effector protein Gala7	Arabidopsis thaliana	Ralstonia solanacearum	N	Y	0.62
O64645	Q2NJQ2	MADS-box protein SOC1	SVM_signal domain-containing protein	Arabidopsis thaliana	Aster yellows witches'-broom phytoplasma	N	N	0.96
O64647	A0A088QD63	Transcription factor TCP9	Effector protein OEC27	Arabidopsis thaliana	Golovinomyces orontii	N	N	0.07
O64647	A0A088QF78	Transcription factor TCP9	Effector protein OEC49	Arabidopsis thaliana	Golovinomyces orontii	N	N	0.01
O64647	A0A088QTX5	Transcription factor TCP9	Effector protein OEC39	Arabidopsis thaliana	Golovinomyces orontii	N	N	0.03
O80480	A8VZX9	Importin subunit alpha-4	Rcorf28	Arabidopsis thaliana	Agrobacterium rhizogenes	N	N	0.99
O81055	Q8XRE0	SKP1-like protein 16	Lrr-gala family type III effector protein Gala1	Arabidopsis thaliana	Ralstonia solanacearum	N	N	0.59
O81057	P52286	SKP1-like protein 14	Suppressor of kinetochore protein 1	Arabidopsis thaliana	Saccharomyces cerevisiae	Y	Y	0.87
O81057	Q8XRE0	SKP1-like protein 14	Lrr-gala family type III effector protein Gala1	Arabidopsis thaliana	Ralstonia solanacearum	N	N	0.68
O81058	P52286	SKP1-like protein 19	Suppressor of kinetochore protein 1	Arabidopsis thaliana	Saccharomyces cerevisiae	N	Y	0.91
P0DKH5	Q52432	Disease resistance protein RRS1	Avirulence protein	Arabidopsis thaliana	Pseudomonas syringae	N	N	0.04
P0DKH5	Q8Y125	Disease resistance protein RRS1	Type III effector protein popp2	Arabidopsis thaliana	Ralstonia solanacearum	N	N	0.96
P23321	P0AA25	Oxygen-evolving enhancer protein 1-1	Thioredoxin 1	Arabidopsis thaliana	Escherichia coli	N	N	0.92
P23321	P52231	Oxygen-evolving enhancer protein 1-1	Thioredoxin	Arabidopsis thaliana	Synechocystis sp	N	N	0.91
P24100	P08463	Cyclin-dependent kinase A-1	Cyclin-dependent kinases regulatory subunit	Arabidopsis thaliana	Schizosaccharomyces pombe	Y	N	0.98
P25859	P08463	Cyclin-dependent kinase B1-1	Cyclin-dependent kinases regulatory subunit	Arabidopsis thaliana	Schizosaccharomyces pombe	Y	N	0.98
P29382	Q2NJQ2	Developmental protein SEPALLATA 1	SVM_signal domain-containing protein	Arabidopsis thaliana	Aster yellows witches'-broom phytoplasma	N	N	0.96
P29383	Q2NJQ2	Agamous-like MADS-box protein AGL3	SVM_signal domain-containing protein	Arabidopsis thaliana	Aster yellows witches'-broom phytoplasma	N	N	0.93
P29384	Q2NJQ2	Developmental protein SEPALLATA 2	SVM_signal domain-containing protein	Arabidopsis thaliana	Aster yellows witches'-broom phytoplasma	N	N	0.98
P29386	Q2NJQ2	Agamous-like MADS-box protein AGL6	SVM_signal domain-containing protein	Arabidopsis thaliana	Aster yellows witches'-broom phytoplasma	N	N	0.99
P35631	Q2NJQ2	Floral homeotic protein APETALA 1	SVM_signal domain-containing protein	Arabidopsis thaliana	Aster yellows witches'-broom phytoplasma	N	N	0.94
P55034	P48510	26S proteasome non-ATPase regulatory subunit 4 homolog	Ubiquitin domain-containing protein DSK2	Arabidopsis thaliana	Saccharomyces cerevisiae	N	N	0.93
P81760	P0AA25	Thylakoid lumenal 17.4 kDa protein	Thioredoxin 1	Arabidopsis thaliana	Escherichia coli	N	N	0.92
P82658	P52231	Thylakoid lumenal 19 kDa protein	Thioredoxin	Arabidopsis thaliana	Synechocystis sp	N	N	0.81
P92958	P12904	SNF1-related protein kinase catalytic subunit alpha KIN11	5'-AMP-activated protein kinase subunit gamma	Arabidopsis thaliana	Saccharomyces cerevisiae	Y	N	0.84
P94102	P32863	DNA repair protein RAD51 homolog 1	DNA repair and recombination protein RAD54	Arabidopsis thaliana	Saccharomyces cerevisiae	Y	N	0.93
Q0PCS3	P25454	Protein CHROMATIN REMODELING 25	DNA repair protein RAD51	Arabidopsis thaliana	Saccharomyces cerevisiae	Y	N	0.88
Q1PEL7	P52286	SKP1-like protein 15	Suppressor of kinetochore protein 1	Arabidopsis thaliana	Saccharomyces cerevisiae	Y	Y	0.85
Q38838	Q2NJQ2	Agamous-like MADS-box protein AGL14	SVM_signal domain-containing protein	Arabidopsis thaliana	Aster yellows witches'-broom phytoplasma	N	N	0.95
Q38841	Q2NJQ2	Agamous-like MADS-box protein AGL12	SVM_signal domain-containing protein	Arabidopsis thaliana	Aster yellows witches'-broom phytoplasma	N	N	0.96
Q38876	Q2NJQ2	Agamous-like MADS-box protein AGL8	SVM_signal domain-containing protein	Arabidopsis thaliana	Aster yellows witches'-broom phytoplasma	N	N	0.97
Q38879	P18408	Thioredoxin H2	Phosphoadenosine phosphosulfate reductase	Arabidopsis thaliana	Saccharomyces cerevisiae	N	N	0.8
Q38879	P29509	Thioredoxin H2	Thioredoxin reductase 1	Arabidopsis thaliana	Saccharomyces cerevisiae	Y	N	0.84
Q38879	P34760	Thioredoxin H2	Peroxiredoxin TSA1	Arabidopsis thaliana	Saccharomyces cerevisiae	Y	N	0.93
Q38879	P38013	Thioredoxin H2	Peroxiredoxin AHP1	Arabidopsis thaliana	Saccharomyces cerevisiae	N	N	0.82
Q38879	P40029	Thioredoxin H2	Peptide methionine sulfoxide reductase	Arabidopsis thaliana	Saccharomyces cerevisiae	N	N	0.86
Q39023	P25323	Mitogen-activated protein kinase 3	Myosin light chain kinase A	Arabidopsis thaliana	Dictyostelium discoideum	N	Y	0.59
Q39081	Q2NJQ2	Transcription factor CAULIFLOWER	SVM_signal domain-containing protein	Arabidopsis thaliana	Aster yellows witches'-broom phytoplasma	N	N	0.96
Q39249	P0AA25	Violaxanthin de-epoxidase	Thioredoxin 1	Arabidopsis thaliana	Escherichia coli	N	N	0.99
Q39249	P52231	Violaxanthin de-epoxidase	Thioredoxin	Arabidopsis thaliana	Synechocystis sp	N	N	0.98
Q39255	P24814	SKP1-like protein 1A	SCF E3 ubiquitin ligase complex F-box protein GRR1	Arabidopsis thaliana	Saccharomyces cerevisiae	Y	N	0.6
Q39255	Q8XRE0	SKP1-like protein 1A	Lrr-gala family type III effector protein Gala1	Arabidopsis thaliana	Ralstonia solanacearum	N	N	0.55
Q39255	Q8XYF7	SKP1-like protein 1A	Probable lrr-gala family type III effector protein Gala5	Arabidopsis thaliana	Ralstonia solanacearum	N	N	0.58
Q39255	Q8XZN8	SKP1-like protein 1A	Lrr-gala family type III effector protein Gala7	Arabidopsis thaliana	Ralstonia solanacearum	N	Y	0.64
Q39255	Q8XZN9	SKP1-like protein 1A	Type III effector protein gala6	Arabidopsis thaliana	Ralstonia solanacearum	N	N	0.59
Q42029	P0AA25	Oxygen-evolving enhancer protein 2-1	Thioredoxin 1	Arabidopsis thaliana	Escherichia coli	N	N	0.9
Q42029	P52231	Oxygen-evolving enhancer protein 2-1	Thioredoxin	Arabidopsis thaliana	Synechocystis sp	N	N	0.88
Q42384	P06782	Protein pleiotropic regulatory locus 1	Carbon catabolite-derepressing protein kinase	Arabidopsis thaliana	Saccharomyces cerevisiae	Y	N	0.84
Q42403	P00330	Thioredoxin H3	Alcohol dehydrogenase 1	Arabidopsis thaliana	Saccharomyces cerevisiae	N	N	0.93
Q42403	P38013	Thioredoxin H3	Peroxiredoxin AHP1	Arabidopsis thaliana	Saccharomyces cerevisiae	N	N	0.82
Q42403	P40029	Thioredoxin H3	Peptide methionine sulfoxide reductase	Arabidopsis thaliana	Saccharomyces cerevisiae	N	N	0.87
Q5HZ38	P03567	Serine/threonine-protein kinase GRIK2	Replication-associated protein	Arabidopsis thaliana	Tomato golden mosaic virus	N	N	0.76
Q683D7	Q2NJQ2	Protein MADS AFFECTING FLOWERING 5	SVM_signal domain-containing protein	Arabidopsis thaliana	Aster yellows witches'-broom phytoplasma	N	N	0.9
Q7X9H6	Q2NJQ2	AGAMOUS-like 79	SVM_signal domain-containing protein	Arabidopsis thaliana	Aster yellows witches'-broom phytoplasma	N	N	0.99
Q84JS6	A0A088QCU2	Homeobox protein knotted-1-like 6	Effector protein OEC84	Arabidopsis thaliana	Golovinomyces orontii	N	N	0.11
Q84K25	A0A088QTW6	Conserved oligomeric Golgi complex subunit 8	Effector protein OEC25	Arabidopsis thaliana	Golovinomyces orontii	N	N	0.03
Q84VQ1	P06782	SNF1-related protein kinase regulatory subunit beta-1	Carbon catabolite-derepressing protein kinase	Arabidopsis thaliana	Saccharomyces cerevisiae	Y	Y	0.75
Q84VQ1	P12904	SNF1-related protein kinase regulatory subunit beta-1	5'-AMP-activated protein kinase subunit gamma	Arabidopsis thaliana	Saccharomyces cerevisiae	N	N	0.78
Q8H0U4	P32505	Transportin-1	Nuclear polyadenylated RNA-binding protein NAB2	Arabidopsis thaliana	Saccharomyces cerevisiae	N	N	0.92
Q8H1Q1	P52231	Thylakoid lumenal protein TL20.3	Thioredoxin	Arabidopsis thaliana	Synechocystis sp	N	N	0.96
Q8H2D5	P15873	DNA polymerase eta	Proliferating cell nuclear antigen	Arabidopsis thaliana	Saccharomyces cerevisiae	N	N	0.75
Q8L7G9	A0A088QD82	SBP (S-ribonuclease binding protein) family protein	Effector protein OEC61	Arabidopsis thaliana	Golovinomyces orontii	N	N	0.14
Q93V58	P03567	Serine/threonine-protein kinase GRIK1	Replication-associated protein	Arabidopsis thaliana	Tomato golden mosaic virus	N	N	0.71
Q93Z00	A0A088QCP8	Transcription factor TCP14	Effector protein OEC125	Arabidopsis thaliana	Golovinomyces orontii	N	N	0.11
Q93Z00	A0A088QD54	Transcription factor TCP14	Effector protein OEC16a	Arabidopsis thaliana	Golovinomyces orontii	N	N	0.05
Q93Z00	A0A088QD63	Transcription factor TCP14	Effector protein OEC27	Arabidopsis thaliana	Golovinomyces orontii	N	N	0.13
Q93Z00	A0A088QD79	Transcription factor TCP14	Effector protein OEC55	Arabidopsis thaliana	Golovinomyces orontii	N	N	0.06
Q93Z00	A0A088QF47	Transcription factor TCP14	Effector protein OEC113	Arabidopsis thaliana	Golovinomyces orontii	N	N	0.17
Q93Z00	A0A088QTV3	Transcription factor TCP14	Effector protein OEC123	Arabidopsis thaliana	Golovinomyces orontii	N	N	0.03
Q93Z00	A0A088QTX5	Transcription factor TCP14	Effector protein OEC39	Arabidopsis thaliana	Golovinomyces orontii	N	N	0.27
Q93Z00	G3C9M6	Transcription factor TCP14	RxLR effector	Arabidopsis thaliana	Hyaloperonospora arabidopsidis	N	N	0.06
Q93Z00	G3C9N6	Transcription factor TCP14	RxLR effector	Arabidopsis thaliana	Hyaloperonospora arabidopsidis	N	N	0.09
Q94A97	P53152	Ubiquitin-conjugating enzyme E2 35	Ubiquitin-conjugating enzyme variant MMS2	Arabidopsis thaliana	Saccharomyces cerevisiae	Y	Y	0.97
Q9AT76	Q2NJQ2	Agamous-like MADS-box protein AGL27	SVM_signal domain-containing protein	Arabidopsis thaliana	Aster yellows witches'-broom phytoplasma	N	N	0.86
Q9C9L2	A0A088QTX5	Transcription factor TCP15	Effector protein OEC39	Arabidopsis thaliana	Golovinomyces orontii	N	N	0.2
Q9FHW7	P24814	SKP1-like protein 1B	SCF E3 ubiquitin ligase complex F-box protein GRR1	Arabidopsis thaliana	Saccharomyces cerevisiae	Y	N	0.55
Q9FHW7	Q8XRE0	SKP1-like protein 1B	Lrr-gala family type III effector protein Gala1	Arabidopsis thaliana	Ralstonia solanacearum	N	N	0.67
Q9FHW7	Q8XYF7	SKP1-like protein 1B	Probable lrr-gala family type III effector protein Gala5	Arabidopsis thaliana	Ralstonia solanacearum	N	N	0.6
Q9FHW7	Q8XZN8	SKP1-like protein 1B	Lrr-gala family type III effector protein Gala7	Arabidopsis thaliana	Ralstonia solanacearum	N	Y	0.72
Q9FHW7	Q8XZN9	SKP1-like protein 1B	Type III effector protein gala6	Arabidopsis thaliana	Ralstonia solanacearum	N	N	0.72
Q9FJP7	A0A088QF67	ENTH/VHS family protein	Effector protein OEC35	Arabidopsis thaliana	Golovinomyces orontii	N	N	0.15
Q9FL28	P21184	LRR receptor-like serine/threonine-protein kinase FLS2	A-type flagellin	Arabidopsis thaliana	Pseudomonas aeruginosa	N	Y	0.88
Q9FMP0	G3C9P1	Mediator of RNA polymerase II transcription subunit 19a	RxLR effector	Arabidopsis thaliana	Hyaloperonospora arabidopsidis	N	N	0.08
Q9FZ48	P53152	Ubiquitin-conjugating enzyme E2 36	Ubiquitin-conjugating enzyme variant MMS2	Arabidopsis thaliana	Saccharomyces cerevisiae	Y	Y	0.97
Q9LDX1	Q764F6	Protein SUPPRESSOR OF GENE SILENCING 3	Protein V2	Arabidopsis thaliana	Tomato yellow leaf curl virus-Mild	N	N	1
Q9LNT9	Q8XRE0	SKP1-like protein 4	Lrr-gala family type III effector protein Gala1	Arabidopsis thaliana	Ralstonia solanacearum	N	N	0.62
Q9LSD5	A0A088QD22	Transcription factor TCP20	Effector protein OEC14	Arabidopsis thaliana	Golovinomyces orontii	N	N	0.49
Q9LU86	P0AA25	Peroxiredoxin Q	Thioredoxin 1	Arabidopsis thaliana	Escherichia coli	N	N	0.84
Q9LU86	P52231	Peroxiredoxin Q	Thioredoxin	Arabidopsis thaliana	Synechocystis sp	N	N	0.88
Q9M1X5	P52286	SKP1-like protein 13	Suppressor of kinetochore protein 1	Arabidopsis thaliana	Saccharomyces cerevisiae	Y	Y	0.82
Q9M1X5	Q8XRE0	SKP1-like protein 13	Lrr-gala family type III effector protein Gala1	Arabidopsis thaliana	Ralstonia solanacearum	N	N	0.54
Q9M1X5	Q8XYF7	SKP1-like protein 13	Probable lrr-gala family type III effector protein Gala5	Arabidopsis thaliana	Ralstonia solanacearum	N	N	0.54
Q9M1X5	Q8XZN8	SKP1-like protein 13	Lrr-gala family type III effector protein Gala7	Arabidopsis thaliana	Ralstonia solanacearum	N	Y	0.59
Q9M1X5	Q8XZN9	SKP1-like protein 13	Type III effector protein gala6	Arabidopsis thaliana	Ralstonia solanacearum	N	N	0.71
Q9M7Q7	Q04049	Proliferating cellular nuclear antigen 1	DNA polymerase eta	Arabidopsis thaliana	Saccharomyces cerevisiae	N	N	0.77
Q9MA75	P15597	Transcription factor VIP1	Protein VirF	Arabidopsis thaliana	Agrobacterium tumefaciens	N	N	0.14
Q9S7Q7	Q2NJQ2	MADS-box protein FLOWERING LOCUS C	SVM_signal domain-containing protein	Arabidopsis thaliana	Aster yellows witches'-broom phytoplasma	N	N	0.9
Q9S7W5	A0A088QD82	Transcription factor TCP13	Effector protein OEC61	Arabidopsis thaliana	Golovinomyces orontii	N	N	0.3
Q9S841	P0AA25	Oxygen-evolving enhancer protein 1-2	Thioredoxin 1	Arabidopsis thaliana	Escherichia coli	N	N	0.75
Q9S841	P52231	Oxygen-evolving enhancer protein 1-2	Thioredoxin	Arabidopsis thaliana	Synechocystis sp	N	N	0.91
Q9SAZ5	P39928	Histidine-containing phosphotransfer protein 3	Osmosensing histidine protein kinase SLN1	Arabidopsis thaliana	Saccharomyces cerevisiae	N	N	0.99
Q9SCL7	P0A3F4	Acetylglutamate kinase	Nitrogen regulatory protein P-II	Arabidopsis thaliana	Synechococcus elongatus	Y	N	0.89
Q9SCY5	P06782	SNF1-related protein kinase regulatory subunit beta-2	Carbon catabolite-derepressing protein kinase	Arabidopsis thaliana	Saccharomyces cerevisiae	Y	Y	0.79
Q9SCY5	P12904	SNF1-related protein kinase regulatory subunit beta-2	5'-AMP-activated protein kinase subunit gamma	Arabidopsis thaliana	Saccharomyces cerevisiae	N	N	0.82
Q9SII8	P38886	Ubiquitin domain-containing protein DSK2b	26S proteasome regulatory subunit RPN10	Arabidopsis thaliana	Saccharomyces cerevisiae	N	N	0.89
Q9SL65	P52286	SKP1-like protein 17	Suppressor of kinetochore protein 1	Arabidopsis thaliana	Saccharomyces cerevisiae	N	Y	0.75
Q9SUR9	A0A0H3NF38	Protein SGT1 homolog A	RING-type E3 ubiquitin transferase	Arabidopsis thaliana	Salmonella typhimurium	N	N	0.72
Q9SUT5	A0A0H3NF38	Protein SGT1 homolog B	RING-type E3 ubiquitin transferase	Arabidopsis thaliana	Salmonella typhimurium	N	N	0.89
Q9SY65	P52286	SKP1-like protein 18	Suppressor of kinetochore protein 1	Arabidopsis thaliana	Saccharomyces cerevisiae	Y	Y	0.79
Q9SZI2	A0A088QF82	Nucleosome assembly protein 1;1	Effector protein OEC56	Arabidopsis thaliana	Golovinomyces orontii	N	N	0.01
Q9XGM3	Q52432	Disease resistance protein RPS4	Avirulence protein	Arabidopsis thaliana	Pseudomonas syringae	N	N	0
Q9XGM3	Q8Y125	Disease resistance protein RPS4	Type III effector protein popp2	Arabidopsis thaliana	Ralstonia solanacearum	N	N	0.95
Q9ZNV8	P39928	Histidine-containing phosphotransfer protein 2	Osmosensing histidine protein kinase SLN1	Arabidopsis thaliana	Saccharomyces cerevisiae	N	N	0.97
Q9ZNV9	P39928	Histidine-containing phosphotransfer protein 1	Osmosensing histidine protein kinase SLN1	Arabidopsis thaliana	Saccharomyces cerevisiae	N	N	0.97
Q9ZST4	P0A3F4	Nitrogen regulatory protein P-II homolog	Nitrogen regulatory protein P-II	Arabidopsis thaliana	Synechococcus elongatus	Y	Y	1
Q9ZST4	P0A9Z1	Nitrogen regulatory protein P-II homolog	Nitrogen regulatory protein P-II 1	Arabidopsis thaliana	Escherichia coli	Y	Y	0.97
Q9ZST4	P0AC55	Nitrogen regulatory protein P-II homolog	Nitrogen regulatory protein P-II 2	Arabidopsis thaliana	Escherichia coli	Y	Y	0.98
Q9ZU90	P52286	F-box protein SKIP28	Suppressor of kinetochore protein 1	Arabidopsis thaliana	Saccharomyces cerevisiae	Y	N	0.39
Q9ZW35	Q04049	Proliferating cell nuclear antigen 2	DNA polymerase eta	Arabidopsis thaliana	Saccharomyces cerevisiae	N	N	0.79
Q9ZWS9	A0A0H2VBI7	Two-component response regulator ARR3	Aerobic respiration control sensor protein	Arabidopsis thaliana	Escherichia coli	N	Y	0.99
