# Supplementary material for: Predicting Protein–Protein Interactions Between Rice and Blast Fungus Using Structure-Based Approaches
Source: Front Plant Sci. 2021 Jul 23;12:690124. doi: 10.3389/fpls.2021.690124 (PMC8343130; doi:10.3389/fpls.2021.690124)
Supplement: Supplementary Table 3 — The predicted PPIs between rice and blast fungus. [file Table_3.XLSX]

## Sheet: Supplementary Table 3
Supplementary Table 3. The predicted PPIs between rice and blast fungus
Rice gene	Blast fungus gene	Annotation (rice gene)	Annotation (blast fungus gene)	With interacting domains	With interolog mapping	Interaction score
LOC_Os04g05060	MGG_00023	cytochrome P450 94A1	Isotrichodermin C-15 hydroxylase	Y	N	0.52
LOC_Os08g42530	MGG_00111	SFC	Phospholipid-transporting ATPase 1	N	N	0.65
LOC_Os01g09370	MGG_00126	ankyrin repeat domain-containing protein 28	Putative uncharacterized protein	N	N	0.58
LOC_Os03g27080	MGG_00126	calmodulin-binding transcription activator 2	Putative uncharacterized protein	N	N	0.62
LOC_Os04g41280	MGG_00126	ankyrin repeat domain containing protein	Putative uncharacterized protein	N	N	0.65
LOC_Os07g30774	MGG_00126	calmodulin-binding transcription activator 5	Putative uncharacterized protein	N	N	0.66
LOC_Os07g43030	MGG_00126	calmodulin-binding transcription activator	Putative uncharacterized protein	N	N	0.74
LOC_Os12g12810	MGG_00126	ankyrin repeat family protein	Putative uncharacterized protein	N	N	0.55
LOC_Os01g11946	MGG_00141	ABC transporter, ATP-binding protein	Leptomycin B resistance protein pmd1	Y	N	0.56
LOC_Os03g54790	MGG_00141	ABC transporter, ATP-binding protein	Leptomycin B resistance protein pmd1	Y	N	0.52
LOC_Os06g23460	MGG_00141	KH domain containing protein	Leptomycin B resistance protein pmd1	N	N	0.51
LOC_Os12g37580	MGG_00141	ABC transporter, ATP-binding protein	Leptomycin B resistance protein pmd1	Y	N	0.53
LOC_Os03g20650	MGG_00163	bZIP transcription factor domain containing protein	Putative uncharacterized protein	N	N	0.59
LOC_Os06g50600	MGG_00163	bZIP transcription factor domain containing protein	Putative uncharacterized protein	N	N	0.51
LOC_Os06g50830	MGG_00163	bZIP transcription factor domain containing protein	Putative uncharacterized protein	N	N	0.51
LOC_Os08g38020	MGG_00163	bZIP transcription factor domain containing protein	Putative uncharacterized protein	N	N	0.525
LOC_Os12g40920	MGG_00163	bZIP transcription factor domain containing protein	Putative uncharacterized protein	N	N	0.76
LOC_Os05g49890	MGG_00215	ras-related protein	Fungal cellulose binding domain-containing protein	N	N	0.67
LOC_Os03g17180	MGG_00239	ABC transporter, ATP-binding protein	Multidrug resistance protein 1	Y	N	0.51
LOC_Os06g06440	MGG_00239	ABC transporter, ATP-binding protein	Multidrug resistance protein 1	Y	N	0.51
LOC_Os11g05700	MGG_00239	ABC transporter family protein	Multidrug resistance protein 1	Y	N	0.52
LOC_Os04g54474	MGG_00245	transcription factor	Putative uncharacterized protein	N	N	0.51
LOC_Os09g16920	MGG_00274	desaturase/cytochrome b5 protein	Membrane-associated progesterone receptor component 1	Y	N	0.58
LOC_Os01g68060	MGG_00291	copine	Ankyrin repeat domain-containing protein 28	N	N	0.59
LOC_Os01g70670	MGG_00291	BTBM1 - Bric-a-Brac, Tramtrack, Broad Complex BTB domain with Meprin and TRAF Homology MATH domain	Ankyrin repeat domain-containing protein 28	N	N	0.54
LOC_Os01g73000	MGG_00291	copine	Ankyrin repeat domain-containing protein 28	N	N	0.57
LOC_Os02g03760	MGG_00291	expressed protein	Ankyrin repeat domain-containing protein 28	N	N	0.63
LOC_Os02g53040	MGG_00291	STE_MEKK_ste11_MAP3K.11 - STE kinases include homologs to sterile 7, sterile 11 and sterile 20 from yeast	Ankyrin repeat domain-containing protein 28	Y	N	0.533333
LOC_Os03g53770	MGG_00291	RNA recognition motif containing protein	Ankyrin repeat domain-containing protein 28	N	N	0.51
LOC_Os04g28100	MGG_00291	spotted leaf 11	Ankyrin repeat domain-containing protein 28	N	N	0.59
LOC_Os04g32560	MGG_00291	ATP-dependent Clp protease ATP-binding subunit clpA homolog CD4B,chloroplast precursor	Ankyrin repeat domain-containing protein 28	N	N	0.51
LOC_Os04g52630	MGG_00291	leucine-rich repeat-containing protein kinase family protein	Ankyrin repeat domain-containing protein 28	Y	N	0.53
LOC_Os05g04950	MGG_00291	protein binding protein	Ankyrin repeat domain-containing protein 28	N	N	0.65
LOC_Os06g05870	MGG_00291	dual specificity protein phosphatase	Ankyrin repeat domain-containing protein 28	N	N	0.51
LOC_Os06g40650	MGG_00291	copine-1	Ankyrin repeat domain-containing protein 28	N	N	0.55
LOC_Os08g03650	MGG_00291	BTBN17 - Bric-a-Brac, Tramtrack, Broad Complex BTB domain with non-phototropic hypocotyl 3 NPH3 and coiled-coil domains	Ankyrin repeat domain-containing protein 28	N	N	0.6
LOC_Os08g04130	MGG_00291	copine-6	Ankyrin repeat domain-containing protein 28	N	N	0.6
LOC_Os08g38600	MGG_00291	copine	Ankyrin repeat domain-containing protein 28	N	N	0.59
LOC_Os09g32820	MGG_00291	uridine/cytidine kinase-like 1	Ankyrin repeat domain-containing protein 28	N	N	0.51
LOC_Os09g39740	MGG_00291	ACT domain containing protein	Ankyrin repeat domain-containing protein 28	N	N	0.63
LOC_Os10g29330	MGG_00291	speckle-type POZ protein B	Ankyrin repeat domain-containing protein 28	N	N	0.64
LOC_Os11g02070	MGG_00291	BTB8 - Bric-a-Brac, Tramtrack, Broad Complex BTB domain	Ankyrin repeat domain-containing protein 28	N	N	0.59
LOC_Os12g02030	MGG_00291	BTB9 - Bric-a-Brac, Tramtrack, Broad Complex BTB domain	Ankyrin repeat domain-containing protein 28	N	N	0.6
LOC_Os12g19030	MGG_00291	copine	Ankyrin repeat domain-containing protein 28	N	N	0.56
LOC_Os12g32992	MGG_00291	expressed protein	Ankyrin repeat domain-containing protein 28	N	N	0.56
LOC_Os01g44069	MGG_00343	glycerol-3-phosphate acyltransferase	Putative uncharacterized protein	N	N	0.52
LOC_Os06g21930	MGG_00346	inorganic phosphate transporter	Pi-transporter A-1	Y	N	0.61
LOC_Os06g45140	MGG_00362	bZIP transcription factor domain containing protein	3-ketodihydrosphingosine reductase tsc10	N	N	0.54
LOC_Os02g44300	MGG_00416	MSP domain containing protein	MFS transporter	N	N	0.63
LOC_Os09g27900	MGG_00419	plastidic glucose transporter 1	Major facilitator superfamily transporter	N	N	0.59
LOC_Os01g09760	MGG_00447	DIRP family protein	Brefeldin A resistance protein	N	N	0.52
LOC_Os03g17020	MGG_00447	GTPase-activating protein	Brefeldin A resistance protein	N	N	0.59
LOC_Os05g23800	MGG_00447	RNA recognition motif containing protein	Brefeldin A resistance protein	N	N	0.52
LOC_Os11g08050	MGG_00447	expressed protein	Brefeldin A resistance protein	N	N	0.56
LOC_Os12g43100	MGG_00447	deoxyhypusine hydroxylase	Brefeldin A resistance protein	N	N	0.51
LOC_Os12g43940	MGG_00447	ankyrin repeat domain-containing protein	Brefeldin A resistance protein	N	N	0.51
LOC_Os03g47650	MGG_00460	ankyrin	Rhamnolipids biosynthesis 3-oxoacyl-	N	N	0.69
LOC_Os08g15840	MGG_00460	ankyrin repeat-rich protein	Rhamnolipids biosynthesis 3-oxoacyl-	N	N	0.68
LOC_Os11g02100	MGG_00461	peroxidase precursor	Putative uncharacterized protein	Y	N	0.51
LOC_Os06g21930	MGG_00464	inorganic phosphate transporter	MFS phospholipid transporter Git1	Y	N	0.64
LOC_Os07g23600	MGG_00593	root cap protein	Putative uncharacterized protein	N	N	0.52
LOC_Os08g26880	MGG_00618	bZIP transcription factor domain containing protein	Pectinesterase	N	N	0.62
LOC_Os01g57470	MGG_00654	EF hand family protein	EF hand domain-containing protein	Y	N	0.74
LOC_Os02g03020	MGG_00654	EF hand family protein	EF hand domain-containing protein	Y	N	0.69
LOC_Os02g15510	MGG_00654	BED zinc finger family protein	EF hand domain-containing protein	Y	N	0.82
LOC_Os06g44410	MGG_00654	histidine kinase	EF hand domain-containing protein	N	N	0.53
LOC_Os06g46950	MGG_00654	EF hand family protein	EF hand domain-containing protein	Y	N	0.7
LOC_Os11g24670	MGG_00654	ankyrin repeat family protein	EF hand domain-containing protein	N	N	0.6
LOC_Os05g33410	MGG_00677	xylanase inhibitor	Endoglucanase-1	Y	N	0.51
LOC_Os08g36790	MGG_00747	bZIP transcription factor	Palmitoyltransferase PFA4	N	N	0.53
LOC_Os01g02750	MGG_00772	protein kinase domain containing protein	PX domain-containing protein	N	N	0.51
LOC_Os02g12670	MGG_00772	protein kinase family protein	PX domain-containing protein	N	N	0.55
LOC_Os02g21700	MGG_00772	STE_MEKK_ste11_MAP3K.8 - STE kinases include homologs to sterile 7, sterile 11 and sterile 20 from yeast	PX domain-containing protein	N	N	0.51
LOC_Os03g21770	MGG_00772	phosphoenolpyruvate carboxylase kinase	PX domain-containing protein	N	N	0.51
LOC_Os05g41270	MGG_00772	CAMK_CAMK_like.4 - CAMK includes calcium/calmodulin depedent protein kinases	PX domain-containing protein	N	N	0.59
LOC_Os06g06930	MGG_00772	receptor-like protein kinase	PX domain-containing protein	N	N	0.6
LOC_Os07g18240	MGG_00772	lectin-like receptor kinase	PX domain-containing protein	N	N	0.56
LOC_Os07g35330	MGG_00772	TKL_IRAK_DUF26-lc.13 - DUF26 kinases have homology to DUF26 containing loci	PX domain-containing protein	N	N	0.65
LOC_Os12g06490	MGG_00772	STE_PAK_Ste20_Slob_Wnk.6 - STE kinases include homologs to sterile 7, sterile 11 and sterile 20 from yeast	PX domain-containing protein	N	N	0.52
LOC_Os02g19804	MGG_00804	Zinc finger C-x8-C-x5-C-x3-H type domain containing protein	Putative uncharacterized protein	N	N	0.53
LOC_Os03g49170	MGG_00804	zinc finger family protein	Putative uncharacterized protein	N	N	0.509
LOC_Os07g23600	MGG_00804	root cap protein	Putative uncharacterized protein	N	N	0.58
LOC_Os08g16430	MGG_00832	phytochrome P450	Cytochrome P450	Y	N	0.68
LOC_Os10g23130	MGG_00832	cytochrome P450 88A1	Cytochrome P450	Y	N	0.59
LOC_Os06g39960	MGG_00846	bZIP transcription factor domain containing protein	L-fucose permease Glucose/galactose transporter	N	N	0.52
LOC_Os02g06640	MGG_00892	ubiquitin family protein	ATP synthase subunit 9	N	N	0.55
LOC_Os03g58250	MGG_00892	bZIP transcription factor domain containing protein	ATP synthase subunit 9	N	N	0.54
LOC_Os06g46770	MGG_00892	ubiquitin family protein	ATP synthase subunit 9	N	N	0.55
LOC_Os08g07970	MGG_00892	transcription factor	ATP synthase subunit 9	N	N	0.51
LOC_Os12g34108	MGG_00892	ATP synthase protein 9, mitochondrial	ATP synthase subunit 9	Y	N	0.68
LOC_Os03g52090	MGG_00930	calcium-transporting ATPase 3, endoplasmic reticulum-type	Copper-transporting ATPase 1	Y	N	0.51
LOC_Os01g39820	MGG_00937	expressed protein	ATP-binding cassette sub-family A member 8-A	N	N	0.53
LOC_Os01g53910	MGG_00937	dehydrogenase	ATP-binding cassette sub-family A member 8-A	N	N	0.7
LOC_Os03g14190	MGG_00937	RNA recognition motif containing protein	ATP-binding cassette sub-family A member 8-A	N	N	0.54
LOC_Os03g17060	MGG_00937	RNA recognition motif containing protein	ATP-binding cassette sub-family A member 8-A	N	N	0.6
LOC_Os05g30980	MGG_00937	RNA recognition motif containing protein	ATP-binding cassette sub-family A member 8-A	N	N	0.59
LOC_Os07g41730	MGG_00937	OsPOP16 - Putative Prolyl Oligopeptidase homologue	ATP-binding cassette sub-family A member 8-A	N	N	0.52
LOC_Os08g23590	MGG_00937	ankyrin repeat domain containing protein	ATP-binding cassette sub-family A member 8-A	N	N	0.54
LOC_Os08g42850	MGG_00937	peptidyl-prolyl cis-trans isomerase, FKBP-type	ATP-binding cassette sub-family A member 8-A	N	N	0.51
LOC_Os12g06520	MGG_00937	bZIP transcription factor domain containing protein	ATP-binding cassette sub-family A member 8-A	N	N	0.65
LOC_Os01g65480	MGG_00967	dnaJ domain containing protein	DnaJ domain-containing protein	Y	N	0.56
LOC_Os05g30130	MGG_00967	chaperone protein dnaJ 49	DnaJ domain-containing protein	Y	N	0.65
LOC_Os02g24134	MGG_00978	Sec1 family transport protein	Putative uncharacterized protein	N	N	0.59
LOC_Os08g06480	MGG_00978	lissencephaly type-1-like homology motif	Putative uncharacterized protein	N	N	0.55
LOC_Os01g15470	MGG_00990	protein kinase	Putative uncharacterized protein	Y	N	0.6
LOC_Os01g19160	MGG_00990	protein kinase domain containing protein	Putative uncharacterized protein	Y	N	0.72
LOC_Os01g26300	MGG_00990	OsWAK9 - OsWAK receptor-like cytoplasmic kinase OsWAK-RLCK	Putative uncharacterized protein	Y	N	0.53
LOC_Os01g33110	MGG_00990	receptor-like protein kinase 5 precursor	Putative uncharacterized protein	Y	N	0.51
LOC_Os01g48040	MGG_00990	S-locus-like receptor protein kinase	Putative uncharacterized protein	Y	N	0.51
LOC_Os01g56800	MGG_00990	MATH domain containing protein	Putative uncharacterized protein	N	N	0.52
LOC_Os01g63280	MGG_00990	tyrosine protein kinase domain containing protein	Putative uncharacterized protein	Y	N	0.62
LOC_Os01g66610	MGG_00990	serine/threonine-protein kinase receptor precursor	Putative uncharacterized protein	Y	N	0.52
LOC_Os01g66640	MGG_00990	S-domain receptor-like protein kinase	Putative uncharacterized protein	Y	N	0.53
LOC_Os02g42190	MGG_00990	OsWAK16 - OsWAK receptor-like protein kinase	Putative uncharacterized protein	Y	N	0.59
LOC_Os02g42620	MGG_00990	protein kinase	Putative uncharacterized protein	Y	N	0.56
LOC_Os02g56370	MGG_00990	OsWAK20 - OsWAK receptor-like protein kinase	Putative uncharacterized protein	Y	N	0.55
LOC_Os03g12680	MGG_00990	protein kinase	Putative uncharacterized protein	Y	N	0.64
LOC_Os03g15770	MGG_00990	tyrosine protein kinase domain containing protein	Putative uncharacterized protein	Y	N	0.53
LOC_Os03g16260	MGG_00990	protein kinase	Putative uncharacterized protein	Y	N	0.57
LOC_Os03g62180	MGG_00990	lectin protein kinase family protein	Putative uncharacterized protein	Y	N	0.54
LOC_Os03g62430	MGG_00990	OsWAK28 - OsWAK receptor-like protein kinase	Putative uncharacterized protein	Y	N	0.53
LOC_Os04g03830	MGG_00990	OsWAK29 - OsWAK receptor-like protein kinase	Putative uncharacterized protein	Y	N	0.54
LOC_Os04g29580	MGG_00990	OsWAK37 - OsWAK short gene	Putative uncharacterized protein	Y	N	0.55
LOC_Os04g34320	MGG_00990	S-domain receptor-like protein kinase	Putative uncharacterized protein	Y	N	0.52
LOC_Os04g42740	MGG_00990	serine/threonine-protein kinase receptor precursor	Putative uncharacterized protein	Y	N	0.52
LOC_Os04g43730	MGG_00990	OsWAK51 - OsWAK receptor-like protein kinase	Putative uncharacterized protein	Y	N	0.53
LOC_Os04g45730	MGG_00990	protein kinase domain containing protein	Putative uncharacterized protein	Y	N	0.67
LOC_Os04g46320	MGG_00990	inactive receptor kinase At2g26730 precursor	Putative uncharacterized protein	Y	N	0.54
LOC_Os04g52590	MGG_00990	protein kinase domain containing protein	Putative uncharacterized protein	Y	N	0.59
LOC_Os04g52600	MGG_00990	SHR5-receptor-like kinase	Putative uncharacterized protein	Y	N	0.65
LOC_Os04g52640	MGG_00990	SHR5-receptor-like kinase	Putative uncharacterized protein	Y	N	0.54
LOC_Os04g58250	MGG_00990	protein kinase	Putative uncharacterized protein	Y	N	0.61
LOC_Os04g59320	MGG_00990	protein kinase domain containing protein	Putative uncharacterized protein	Y	N	0.64
LOC_Os05g25390	MGG_00990	tyrosine protein kinase domain containing protein	Putative uncharacterized protein	Y	N	0.52
LOC_Os05g40200	MGG_00990	inactive receptor kinase At2g26730 precursor	Putative uncharacterized protein	Y	N	0.58
LOC_Os06g29810	MGG_00990	lectin protein kinase family protein	Putative uncharacterized protein	Y	N	0.56
LOC_Os08g10070	MGG_00990	protein kinase	Putative uncharacterized protein	Y	N	0.6
LOC_Os08g10330	MGG_00990	SHR5-receptor-like kinase	Putative uncharacterized protein	Y	N	0.58
LOC_Os08g39210	MGG_00990	OsWAK74 - OsWAK receptor-like protein kinase	Putative uncharacterized protein	Y	N	0.53
LOC_Os08g39240	MGG_00990	OsWAK76 - OsWAK receptor-like cytoplasmic kinase OsWAK-RLCK	Putative uncharacterized protein	Y	N	0.53
LOC_Os09g37880	MGG_00990	serine/threonine-protein kinase receptor precursor	Putative uncharacterized protein	Y	N	0.51
LOC_Os09g38830	MGG_00990	OsWAK89a - OsWAK receptor-like protein kinase	Putative uncharacterized protein	Y	N	0.53
LOC_Os10g02250	MGG_00990	OsWAK95 - OsWAK receptor-like protein kinase	Putative uncharacterized protein	Y	N	0.52
LOC_Os10g02284	MGG_00990	OsWAK97 - OsWAK receptor-like protein kinase	Putative uncharacterized protein	Y	N	0.54
LOC_Os10g17910	MGG_00990	OsWAK114 - OsWAK receptor-like cytoplasmic kinase OsWAK-RLCK	Putative uncharacterized protein	Y	N	0.54
LOC_Os11g35120	MGG_00990	OsWAK116 - OsWAK receptor-like cytoplasmic kinase OsWAK-RLCK	Putative uncharacterized protein	Y	N	0.66
LOC_Os11g35290	MGG_00990	OsWAK119 - OsWAK receptor-like cytoplasmic kinase OsWAK-RLCK	Putative uncharacterized protein	Y	N	0.66
LOC_Os02g32160	MGG_01094	copine	Putative uncharacterized protein	Y	N	0.52
LOC_Os02g58230	MGG_01094	C2 domain containing protein	Putative uncharacterized protein	Y	N	0.55
LOC_Os06g51280	MGG_01094	acetolactate synthase 1, chloroplast precursor	Putative uncharacterized protein	N	N	0.52
LOC_Os11g26130	MGG_01094	receptor protein kinase TMK1 precursor	Putative uncharacterized protein	N	N	0.53
LOC_Os02g07840	MGG_01124	bZIP transcription factor domain containing protein	Vesicle transport V-SNARE protein vti1	N	N	0.77
LOC_Os02g14910	MGG_01124	bZIP transcription factor family protein	Vesicle transport V-SNARE protein vti1	N	N	0.61
LOC_Os03g13614	MGG_01124	transcription factor	Vesicle transport V-SNARE protein vti1	N	N	0.63
LOC_Os03g20650	MGG_01124	bZIP transcription factor domain containing protein	Vesicle transport V-SNARE protein vti1	N	N	0.55
LOC_Os05g37170	MGG_01124	transcription factor	Vesicle transport V-SNARE protein vti1	N	N	0.52
LOC_Os05g49420	MGG_01124	transcription factor	Vesicle transport V-SNARE protein vti1	N	N	0.529
LOC_Os07g48660	MGG_01124	bZIP transcription factor domain containing protein	Vesicle transport V-SNARE protein vti1	N	N	0.61
LOC_Os07g48820	MGG_01124	transcription factor	Vesicle transport V-SNARE protein vti1	N	N	0.51
LOC_Os11g14230	MGG_01208	uncharacterized protein yqxC	Putative uncharacterized protein	N	N	0.62
LOC_Os01g73410	MGG_01240	FYVE zinc finger domain containing protein	RING-8 protein	N	N	0.59
LOC_Os05g31920	MGG_01240	FYVE zinc finger domain containing protein	RING-8 protein	N	N	0.54
LOC_Os05g41120	MGG_01245	endoplasmic reticulum-Golgi intermediate compartment protein 3	Endoplasmic reticulum-Golgi intermediate compartment protein 3	Y	N	0.59
LOC_Os08g09100	MGG_01301	RNA recognition motif containing protein	MFS transporter	N	N	0.56
LOC_Os08g09350	MGG_01301	gar2	MFS transporter	N	N	0.64
LOC_Os09g39180	MGG_01301	RNA recognition motif containing protein	MFS transporter	N	N	0.66
LOC_Os11g28610	MGG_01304	transporter family protein	Putative uncharacterized protein	N	N	0.52
LOC_Os01g56990	MGG_01327	Regulator of chromosome condensation domain containing protein	Putative uncharacterized protein	N	N	0.57
LOC_Os03g53960	MGG_01327	transcriptional adaptor	Putative uncharacterized protein	N	N	0.51
LOC_Os05g46740	MGG_01327	regulator of chromosome condensation	Putative uncharacterized protein	N	N	0.6
LOC_Os06g50600	MGG_01336	bZIP transcription factor domain containing protein	Bacteriodes thetaiotaomicron symbiotic chitinase	N	N	0.6125
LOC_Os06g50830	MGG_01336	bZIP transcription factor domain containing protein	Bacteriodes thetaiotaomicron symbiotic chitinase	N	N	0.6125
LOC_Os09g34880	MGG_01381	basic region leucine zipper domain containing protein	Calcium permease	N	N	0.67
LOC_Os08g25040	MGG_01402	expressed protein	BNR/Asp-box repeat domain-containing protein	N	N	0.53
LOC_Os09g39180	MGG_01425	RNA recognition motif containing protein	Putative uncharacterized protein	N	N	0.53
LOC_Os09g38410	MGG_01439	sialin	Inorganic phosphate transporter PHO84	N	N	0.53
LOC_Os10g30770	MGG_01439	inorganic phosphate transporter	Inorganic phosphate transporter PHO84	Y	N	0.6
LOC_Os01g04990	MGG_01493	mitochondrial carrier protein	Putative uncharacterized protein	Y	N	0.53
LOC_Os01g12520	MGG_01493	mitochondrial carrier protein	Putative uncharacterized protein	Y	N	0.55
LOC_Os01g22600	MGG_01493	mitochondrial carrier protein	Putative uncharacterized protein	Y	N	0.57
LOC_Os01g32980	MGG_01493	mitochondrial carrier protein	Putative uncharacterized protein	Y	N	0.55
LOC_Os01g70800	MGG_01493	mitochondrial carrier protein	Putative uncharacterized protein	Y	N	0.57
LOC_Os01g73420	MGG_01493	mitochondrial carrier protein	Putative uncharacterized protein	Y	N	0.57
LOC_Os02g10800	MGG_01493	mitochondrial carrier protein	Putative uncharacterized protein	Y	N	0.56
LOC_Os02g44570	MGG_01493	mitochondrial carrier protein	Putative uncharacterized protein	Y	N	0.55
LOC_Os03g15690	MGG_01493	phosphate carrier protein, mitochondrial precursor	Putative uncharacterized protein	Y	N	0.59
LOC_Os03g15860	MGG_01493	mitochondrial carrier protein	Putative uncharacterized protein	Y	N	0.55
LOC_Os05g07900	MGG_01493	mitochondrial carrier protein	Putative uncharacterized protein	Y	N	0.56
LOC_Os05g23720	MGG_01493	mitochondrial carrier protein	Putative uncharacterized protein	Y	N	0.55
LOC_Os06g40050	MGG_01493	mitochondrial carrier protein	Putative uncharacterized protein	Y	N	0.58
LOC_Os08g29720	MGG_01493	mitochondrial carrier protein	Putative uncharacterized protein	Y	N	0.54
LOC_Os08g40850	MGG_01493	mitochondrial carrier protein	Putative uncharacterized protein	Y	N	0.57
LOC_Os09g32200	MGG_01493	mitochondrial carrier protein	Putative uncharacterized protein	Y	N	0.57
LOC_Os10g25830	MGG_01493	mitochondrial carrier protein	Putative uncharacterized protein	Y	N	0.52
LOC_Os11g43960	MGG_01493	mitochondrial carrier protein	Putative uncharacterized protein	Y	N	0.58
LOC_Os11g47610	MGG_01542	glycosyl hydrolase	Glycosyl hydrolase family 10	Y	N	0.523333
LOC_Os03g39540	MGG_01544	cytochrome P450	Putative uncharacterized protein	Y	N	0.53
LOC_Os06g43440	MGG_01544	cytochrome P450	Putative uncharacterized protein	Y	N	0.52
LOC_Os06g23460	MGG_01674	KH domain containing protein	Multidrug resistance-associated protein 1	N	N	0.57
LOC_Os03g19340	MGG_01732	WD domain, G-beta repeat domain containing protein	3-carboxymuconate cyclase	N	N	0.51
LOC_Os06g50880	MGG_01732	WD domain, G-beta repeat domain containing protein	3-carboxymuconate cyclase	N	N	0.51
LOC_Os10g40950	MGG_01778	polyol transporter 5	Aflatoxin efflux pump	N	N	0.51
LOC_Os01g68020	MGG_01868	BTBZ2 - Bric-a-Brac, Tramtrack, and Broad Complex BTB domain with TAZ zinc finger and Calmodulin-binding domains	Chitin deacetylase	N	N	0.55
LOC_Os10g28975	MGG_01868	BTB/POZ domain containing protein	Chitin deacetylase	N	N	0.61
LOC_Os10g29190	MGG_01868	BTB/POZ domain containing protein	Chitin deacetylase	N	N	0.71
LOC_Os02g56370	MGG_01876	OsWAK20 - OsWAK receptor-like protein kinase	Chitinase 3	N	N	0.54
LOC_Os10g40950	MGG_01877	polyol transporter 5	MFS transporter	N	N	0.583333
LOC_Os01g03670	MGG_01882	dihydroflavonol-4-reductase	Secretory lipase	N	N	0.53
LOC_Os01g73790	MGG_01882	NAD dependent epimerase/dehydratase family protein	Secretory lipase	N	N	0.58
LOC_Os02g56690	MGG_01882	dihydroflavonol-4-reductase	Secretory lipase	N	N	0.57
LOC_Os02g56700	MGG_01882	dehydrogenase	Secretory lipase	N	N	0.59
LOC_Os02g57180	MGG_01882	NADH dehydrogenase 1 alpha subcomplex subunit 9,mitochondrial precursor	Secretory lipase	N	N	0.64
LOC_Os02g58790	MGG_01882	cell division inhibitor	Secretory lipase	N	N	0.7
LOC_Os05g32140	MGG_01882	NAD dependent epimerase/dehydratase family protein	Secretory lipase	N	N	0.57
LOC_Os06g41840	MGG_01882	reductase	Secretory lipase	N	N	0.62
LOC_Os07g11110	MGG_01882	NAD dependent epimerase/dehydratase family protein	Secretory lipase	N	N	0.67
LOC_Os09g31502	MGG_01882	dehydrogenase	Secretory lipase	N	N	0.51
LOC_Os09g32020	MGG_01882	ubiquitin fusion degradation protein	Secretory lipase	N	N	0.64
LOC_Os10g28200	MGG_01882	NAD dependent epimerase/dehydratase family protein	Secretory lipase	N	N	0.58
LOC_Os10g42620	MGG_01882	dihydroflavonol-4-reductase	Secretory lipase	N	N	0.7
LOC_Os11g37890	MGG_01882	NAD dependent epimerase/dehydratase family protein	Secretory lipase	N	N	0.58
LOC_Os02g48790	MGG_01931	AML1	Siderophore iron transporter mirB	N	N	0.74
LOC_Os06g43440	MGG_02094	cytochrome P450	Cytochrome P450 3A19	Y	N	0.59
LOC_Os10g37034	MGG_02094	cytochrome P450	Cytochrome P450 3A19	Y	N	0.53
LOC_Os10g40950	MGG_02204	polyol transporter 5	Vitamin H transporter	N	N	0.593333
LOC_Os11g28610	MGG_02204	transporter family protein	Vitamin H transporter	N	N	0.53
LOC_Os03g17030	MGG_02243	polyadenylate-binding protein	Amidohydrolase	N	N	0.61
LOC_Os04g39250	MGG_02243	RNA recognition motif family protein	Amidohydrolase	N	N	0.63
LOC_Os06g02240	MGG_02243	RNA recognition motif containing protein	Amidohydrolase	N	N	0.56
LOC_Os11g47610	MGG_02245	glycosyl hydrolase	Endoglucanase type F	Y	N	0.523333
LOC_Os04g52830	MGG_02309	OsFBK15 - F-box domain and kelch repeat containing protein	Carboxypeptidase S1	N	N	0.51
LOC_Os03g03680	MGG_02319	transporter family protein	Pantothenate transporter liz1	N	N	0.63
LOC_Os09g07700	MGG_02348	expressed protein	Multidrug resistance protein 3	Y	N	0.56
LOC_Os04g43710	MGG_02446	CAMK_CAMK_like.3 - CAMK includes calcium/calmodulin depedent protein kinases	Ubiquitin-conjugating enzyme	N	N	0.55
LOC_Os04g55030	MGG_02446	cullin	Ubiquitin-conjugating enzyme	N	N	0.66
LOC_Os09g37910	MGG_02446	HMG1/2	Ubiquitin-conjugating enzyme	N	N	0.51
LOC_Os01g11350	MGG_02466	bZIP transcription factor domain containing protein	V-type proton ATPase proteolipid subunit	N	N	0.51
LOC_Os09g39180	MGG_02475	RNA recognition motif containing protein	Vitamin H transporter 1/biotin symporter vht1	N	N	0.65
LOC_Os05g02940	MGG_02487	calcium-transporting ATPase 2, endoplasmic reticulum-type	Plasma membrane calcium-transporting ATPase 3	Y	N	0.51
LOC_Os02g21110	MGG_02503	OsFBK6 - F-box domain and kelch repeat containing protein	Glucose-regulated protein	N	N	0.531667
LOC_Os09g38410	MGG_02530	sialin	Quinate permease	N	N	0.7
LOC_Os04g46892	MGG_02531	WD domain, G-beta repeat domain containing protein	Minor extracellular protease vpr	N	N	0.56
LOC_Os06g04040	MGG_02531	WD domain, G-beta repeat domain containing protein	Minor extracellular protease vpr	N	N	0.78
LOC_Os02g29130	MGG_02582	ankyrin	Putative uncharacterized protein	N	N	0.75
LOC_Os04g41280	MGG_02582	ankyrin repeat domain containing protein	Putative uncharacterized protein	N	N	0.9
LOC_Os07g30774	MGG_02582	calmodulin-binding transcription activator 5	Putative uncharacterized protein	N	N	0.8
LOC_Os07g43030	MGG_02582	calmodulin-binding transcription activator	Putative uncharacterized protein	N	N	0.72
LOC_Os11g08050	MGG_02582	expressed protein	Putative uncharacterized protein	N	N	0.52
LOC_Os01g42350	MGG_02583	pleiotropic drug resistance protein	Mitochondrial ATP-binding cassette sub-family B member 6	Y	N	0.76
LOC_Os02g11760	MGG_02583	pleiotropic drug resistance protein	Mitochondrial ATP-binding cassette sub-family B member 6	Y	N	0.62
LOC_Os09g16290	MGG_02583	ABC-2 type transporter	Mitochondrial ATP-binding cassette sub-family B member 6	Y	N	0.63
LOC_Os03g18840	MGG_02649	NUC189 domain containing protein	Putative uncharacterized protein	N	N	0.64
LOC_Os04g53540	MGG_02649	homeobox and START domains containing protein	Putative uncharacterized protein	N	N	0.55
LOC_Os08g08820	MGG_02649	homeobox and START domains containing protein	Putative uncharacterized protein	N	N	0.55
LOC_Os11g03990	MGG_02649	WD domain, G-beta repeat domain containing protein	Putative uncharacterized protein	N	N	0.67
LOC_Os12g03822	MGG_02649	WD domain, G-beta repeat domain containing protein	Putative uncharacterized protein	N	N	0.54
LOC_Os12g40260	MGG_02649	WD-40 repeat family protein	Putative uncharacterized protein	N	N	0.51
LOC_Os01g12650	MGG_02722	reticulon domain containing protein	Putative uncharacterized protein	N	N	0.64
LOC_Os10g40950	MGG_02840	polyol transporter 5	Putative uncharacterized protein	N	N	0.54
LOC_Os03g54170	MGG_02841	OsMADS34 - MADS-box family gene with MIKCc type-box	Xaa-Pro aminopeptidase family enzyme	N	N	0.56
LOC_Os05g01240	MGG_02841	AML1	Xaa-Pro aminopeptidase family enzyme	N	N	0.570833
LOC_Os11g03890	MGG_02841	RNA recognition motif containing protein	Xaa-Pro aminopeptidase family enzyme	N	N	0.701667
LOC_Os01g07280	MGG_02856	disease resistance protein	Molybdopterin biosynthesis protein moeB	N	N	0.53
LOC_Os08g34650	MGG_02856	receptor-like protein kinase precursor	Molybdopterin biosynthesis protein moeB	N	N	0.6
LOC_Os11g41100	MGG_02856	expressed protein	Molybdopterin biosynthesis protein moeB	N	N	0.52
LOC_Os12g11510	MGG_02856	hcr2-0B	Molybdopterin biosynthesis protein moeB	N	N	0.56
LOC_Os12g11940	MGG_02856	disease resistance family protein	Molybdopterin biosynthesis protein moeB	N	N	0.57
LOC_Os03g10990	MGG_02863	retinoblastoma-binding protein-like	Oryzin	N	N	0.51
LOC_Os05g06520	MGG_02867	helix-loop-helix DNA-binding domain containing protein	Putative uncharacterized protein	N	N	0.51
LOC_Os07g10150	MGG_02867	coatomer subunit gamma-2	Putative uncharacterized protein	N	N	0.54
LOC_Os02g20540	MGG_02884	fasciclin domain containing protein	Beta-Ig-H3/Fasciclin	Y	N	0.52
LOC_Os02g20560	MGG_02884	fasciclin domain containing protein	Beta-Ig-H3/Fasciclin	Y	N	0.51
LOC_Os04g39590	MGG_02884	fasciclin domain containing protein	Beta-Ig-H3/Fasciclin	Y	N	0.53
LOC_Os08g39270	MGG_02884	fasciclin domain containing protein	Beta-Ig-H3/Fasciclin	Y	N	0.53
LOC_Os03g56010	MGG_02933	bZIP transcription factor domain containing protein	Putative uncharacterized protein	N	N	0.52
LOC_Os11g14230	MGG_02998	uncharacterized protein yqxC	Putative uncharacterized protein	N	N	0.525
LOC_Os02g19210	MGG_03056	WD repeat-containing protein	Aorsin	N	N	0.58
LOC_Os03g21990	MGG_03056	WD domain, G-beta repeat domain containing protein	Aorsin	N	N	0.54
LOC_Os03g33580	MGG_03056	mitotic checkpoint protein	Aorsin	N	N	0.54
LOC_Os03g50340	MGG_03056	coatomer alpha subunit	Aorsin	N	N	0.64
LOC_Os04g55590	MGG_03056	homeobox domain containing protein	Aorsin	N	N	0.51
LOC_Os07g41190	MGG_03056	WD domain, G-beta repeat domain containing protein	Aorsin	N	N	0.58
LOC_Os08g04270	MGG_03056	WD domain, G-beta repeat domain containing protein	Aorsin	N	N	0.81
LOC_Os09g04110	MGG_03056	coatomer alpha subunit	Aorsin	N	N	0.57
LOC_Os10g32710	MGG_03056	WD domain, G-beta repeat domain containing protein	Aorsin	N	N	0.536667
LOC_Os11g07480	MGG_03056	WD domain, G-beta repeat domain containing protein	Aorsin	N	N	0.52
LOC_Os11g10640	MGG_03056	protein kinase domain containing protein	Aorsin	N	N	0.54
LOC_Os01g61500	MGG_03065	BAG domain containing protein	V-type proton ATPase proteolipid subunit 2	N	N	0.6
LOC_Os04g52890	MGG_03065	ATBAG1	V-type proton ATPase proteolipid subunit 2	N	N	0.64
LOC_Os06g03640	MGG_03065	BAG domain containing protein	V-type proton ATPase proteolipid subunit 2	N	N	0.61
LOC_Os09g35630	MGG_03065	BAG domain-containing protein	V-type proton ATPase proteolipid subunit 2	N	N	0.646667
LOC_Os07g30990	MGG_03118	ubiquitin family protein	Putative uncharacterized protein	N	N	0.56
LOC_Os07g33330	MGG_03118	RNA recognition motif containing protein	Putative uncharacterized protein	N	N	0.61
LOC_Os05g28290	MGG_03156	ranBP1 domain containing protein	Putative uncharacterized protein	N	N	0.51
LOC_Os11g28610	MGG_03205	transporter family protein	Polyamine transporter 2	N	N	0.54
LOC_Os01g69970	MGG_03316	WD domain, G-beta repeat domain containing protein	Serin endopeptidase	N	N	0.53
LOC_Os02g32430	MGG_03316	WD domain, G-beta repeat domain containing protein	Serin endopeptidase	N	N	0.58
LOC_Os03g18840	MGG_03316	NUC189 domain containing protein	Serin endopeptidase	N	N	0.67
LOC_Os03g42770	MGG_03316	expressed protein	Serin endopeptidase	N	N	0.53
LOC_Os07g38430	MGG_03316	WD domain, G-beta repeat domain containing protein	Serin endopeptidase	N	N	0.59
LOC_Os12g40260	MGG_03316	WD-40 repeat family protein	Serin endopeptidase	N	N	0.53
LOC_Os03g19370	MGG_03349	CPuORF4 - conserved peptide uORF-containing transcript	Putative uncharacterized protein	N	N	0.51
LOC_Os03g19375	MGG_03349	expressed protein	Putative uncharacterized protein	N	N	0.51
LOC_Os10g08540	MGG_03375	cytochrome P450	Isotrichodermin C-15 hydroxylase	Y	N	0.53
LOC_Os01g63680	MGG_03389	MYB family transcription factor	Putative uncharacterized protein	N	N	0.51
LOC_Os04g39090	MGG_03389	SAM domain containing protein	Putative uncharacterized protein	N	N	0.53
LOC_Os05g31220	MGG_03389	cell division control protein 48 homolog B	Putative uncharacterized protein	N	N	0.56
LOC_Os03g06139	MGG_03406	ABC-2 type transporter domain containing protein	Iron-sulfur clusters transporter ATM1	Y	N	0.51
LOC_Os03g17350	MGG_03406	white-brown complex homolog protein	Iron-sulfur clusters transporter ATM1	Y	N	0.61
LOC_Os05g31910	MGG_03406	white-brown complex homolog protein 16	Iron-sulfur clusters transporter ATM1	Y	N	0.6
LOC_Os07g18874	MGG_03406	white-brown complex homolog protein 11	Iron-sulfur clusters transporter ATM1	Y	N	0.56
LOC_Os08g42530	MGG_03406	SFC	Iron-sulfur clusters transporter ATM1	N	N	0.58
LOC_Os09g03939	MGG_03406	white-brown complex homolog protein 11	Iron-sulfur clusters transporter ATM1	Y	N	0.58
LOC_Os10g30719	MGG_03406	MYB family transcription factor	Iron-sulfur clusters transporter ATM1	N	N	0.58
LOC_Os12g13720	MGG_03406	Plant PDR ABC transporter associated domain containing protein	Iron-sulfur clusters transporter ATM1	Y	N	0.67
LOC_Os12g04410	MGG_03414	BTBA6 - Bric-a-Brac,Tramtrack, Broad Complex BTB domain with Ankyrin repeat region	Short chain dehydrogenase/reductase family protein	N	N	0.683333
LOC_Os04g54474	MGG_03444	transcription factor	Putative uncharacterized protein	N	N	0.51
LOC_Os11g24850	MGG_03444	ankyrin repeat domain containing protein	Putative uncharacterized protein	N	N	0.54
LOC_Os03g48120	MGG_03461	BTB/POZ domain containing protein	Chitin deacetylase	N	N	0.62
LOC_Os04g40630	MGG_03461	BTBZ4 - Bric-a-Brac, Tramtrack, Broad Complex BTB domain with TAZ zinc finger and Calmodulin-binding domains	Chitin deacetylase	N	N	0.53
LOC_Os04g53390	MGG_03461	MrBTB2 - Bric-a-Brac, Tramtrack, Broad Complex BTB domain with Meprin and TRAF Homology MATH-related domain	Chitin deacetylase	N	N	0.64
LOC_Os11g28610	MGG_03491	transporter family protein	Putative uncharacterized protein	N	N	0.55
LOC_Os03g61990	MGG_03557	glycine-rich RNA-binding protein 7	Putative uncharacterized protein	N	N	0.55
LOC_Os05g05220	MGG_03599	glioma tumor suppressor candidate region gene 2 protein	Acidic endochitinase SE2	N	N	0.51
LOC_Os05g49420	MGG_03599	transcription factor	Acidic endochitinase SE2	N	N	0.54
LOC_Os06g29180	MGG_03599	erythronate-4-phosphate dehydrogenase domain containing protein	Acidic endochitinase SE2	N	N	0.56
LOC_Os06g50600	MGG_03599	bZIP transcription factor domain containing protein	Acidic endochitinase SE2	N	N	0.51
LOC_Os06g50830	MGG_03599	bZIP transcription factor domain containing protein	Acidic endochitinase SE2	N	N	0.51
LOC_Os01g36220	MGG_03627	bZIP transcription factor domain containing protein	Putative uncharacterized protein	N	N	0.54
LOC_Os05g41280	MGG_03627	transcription factor HBP-1b	Putative uncharacterized protein	N	N	0.54
LOC_Os12g13170	MGG_03627	transcription factor	Putative uncharacterized protein	N	N	0.65
LOC_Os03g21020	MGG_03640	RNA recognition motif containing protein	Putative uncharacterized protein	N	N	0.51
LOC_Os01g59760	MGG_03664	bZIP transcription factor	Palmitoyltransferase ERF2	N	N	0.52
LOC_Os05g41070	MGG_03664	bZIP transcription factor	Palmitoyltransferase ERF2	N	N	0.55
LOC_Os03g25770	MGG_03701	RNA recognition motif containing protein	Putative uncharacterized protein	N	N	0.58
LOC_Os01g59930	MGG_03708	NADH-cytochrome b5 reductase	NADH-cytochrome b5 reductase 2	Y	N	0.515
LOC_Os03g46770	MGG_03708	RNA recognition motif containing protein	NADH-cytochrome b5 reductase 2	N	N	0.54
LOC_Os05g02400	MGG_03708	RNA recognition motif containing protein	NADH-cytochrome b5 reductase 2	N	N	0.83
LOC_Os05g40990	MGG_03708	NADH-cytochrome b5 reductase	NADH-cytochrome b5 reductase 2	Y	N	0.525
LOC_Os11g38040	MGG_03708	expressed protein	NADH-cytochrome b5 reductase 2	N	N	0.58
LOC_Os11g47830	MGG_03708	RNA recognition motif containing protein	NADH-cytochrome b5 reductase 2	N	N	0.64
LOC_Os11g28610	MGG_03713	transporter family protein	Inner membrane transporter yfaV	N	N	0.54
LOC_Os03g52090	MGG_03724	calcium-transporting ATPase 3, endoplasmic reticulum-type	CLAP1	Y	N	0.56
LOC_Os01g50080	MGG_03736	MDR-like ABC transporter	Multidrug resistance-associated protein 1	Y	N	0.53
LOC_Os06g20010	MGG_03736	RNA recognition motif containing protein	Multidrug resistance-associated protein 1	N	N	0.61
LOC_Os12g37580	MGG_03736	ABC transporter, ATP-binding protein	Multidrug resistance-associated protein 1	Y	N	0.53
LOC_Os08g43090	MGG_03753	bZIP family transcription factor	Putative uncharacterized protein	N	N	0.51
LOC_Os09g16160	MGG_03753	ankyrin repeat family protein	Putative uncharacterized protein	N	N	0.67
LOC_Os09g33600	MGG_03753	ARF GTPase-activating domain-containing protein	Putative uncharacterized protein	N	N	0.53
LOC_Os02g42060	MGG_03791	response regulator receiver domain containing protein	Putative uncharacterized protein	N	N	0.52
LOC_Os04g44280	MGG_03791	OsRR5 type-A response regulator	Putative uncharacterized protein	N	N	0.63
LOC_Os08g28900	MGG_03791	OsRR8 type-A response regulator	Putative uncharacterized protein	N	N	0.54
LOC_Os08g28950	MGG_03791	response regulator receiver domain containing protein	Putative uncharacterized protein	N	N	0.6
LOC_Os03g12350	MGG_03806	two-component response regulator	Putative uncharacterized protein	N	N	0.53
LOC_Os03g29770	MGG_03806	EF hand family protein	Putative uncharacterized protein	Y	N	0.71
LOC_Os03g50760	MGG_03806	EF hand family protein	Putative uncharacterized protein	Y	N	0.52
LOC_Os05g02400	MGG_03806	RNA recognition motif containing protein	Putative uncharacterized protein	N	N	0.68
LOC_Os06g08440	MGG_03806	two-component response regulator	Putative uncharacterized protein	N	N	0.69
LOC_Os06g43910	MGG_03806	two-component response regulator	Putative uncharacterized protein	N	N	0.55
LOC_Os07g12240	MGG_03806	EF hand family protein	Putative uncharacterized protein	Y	N	0.82
LOC_Os09g31025	MGG_03806	EF hand family protein	Putative uncharacterized protein	Y	N	0.66
LOC_Os05g04850	MGG_03820	RNA recognition motif containing protein	Putative uncharacterized protein	N	N	0.62
LOC_Os01g19970	MGG_03826	MYB family transcription factor	Putative uncharacterized protein	N	N	0.68
LOC_Os02g54860	MGG_03826	ankyrin repeat-rich protein	Putative uncharacterized protein	N	N	0.54
LOC_Os03g26130	MGG_03826	MYB family transcription factor	Putative uncharacterized protein	N	N	0.56
LOC_Os03g27090	MGG_03826	MYB family transcription factor	Putative uncharacterized protein	N	N	0.64
LOC_Os03g51110	MGG_03826	MYB family transcription factor	Putative uncharacterized protein	N	N	0.55
LOC_Os03g63720	MGG_03826	exosome complex exonuclease	Putative uncharacterized protein	N	N	0.55
LOC_Os04g39470	MGG_03826	MYB family transcription factor	Putative uncharacterized protein	N	N	0.67
LOC_Os05g04820	MGG_03826	MYB family transcription factor	Putative uncharacterized protein	N	N	0.7
LOC_Os05g41166	MGG_03826	MYB family transcription factor	Putative uncharacterized protein	N	N	0.51
LOC_Os06g45720	MGG_03826	BTB/POZ domain containing protein	Putative uncharacterized protein	N	N	0.59
LOC_Os09g12480	MGG_03826	ulp1 protease family, C-terminal catalytic domain containing protein	Putative uncharacterized protein	N	N	0.63
LOC_Os09g23620	MGG_03826	MYB family transcription factor	Putative uncharacterized protein	N	N	0.52
LOC_Os09g36250	MGG_03826	MYB family transcription factor	Putative uncharacterized protein	N	N	0.51
LOC_Os12g12810	MGG_03826	ankyrin repeat family protein	Putative uncharacterized protein	N	N	0.67
LOC_Os11g28610	MGG_03836	transporter family protein	Putative uncharacterized protein	N	N	0.51
LOC_Os03g02440	MGG_03870	WD repeat-containing protein 44	Minor extracellular protease vpr	N	N	0.74
LOC_Os03g42770	MGG_03870	expressed protein	Minor extracellular protease vpr	N	N	0.65
LOC_Os05g34880	MGG_03870	zinc finger, C3HC4 type family protein	Minor extracellular protease vpr	N	N	0.55
LOC_Os11g05760	MGG_03883	OsProCP5 - Putative Lysosomal Pro-x Carboxypeptidase homologue	Alpha-1,2-mannosyltransferase alg-11	N	N	0.55
LOC_Os01g34060	MGG_03907	MYB family transcription factor	Putative uncharacterized protein	N	N	0.51
LOC_Os01g44370	MGG_03907	MYB family transcription factor	Putative uncharacterized protein	N	N	0.59
LOC_Os01g47370	MGG_03907	MYB family transcription factor	Putative uncharacterized protein	N	N	0.62
LOC_Os01g63460	MGG_03907	MYB family transcription factor	Putative uncharacterized protein	N	N	0.7
LOC_Os01g64360	MGG_03907	MYB family transcription factor	Putative uncharacterized protein	N	N	0.71
LOC_Os01g74020	MGG_03907	MYB family transcription factor	Putative uncharacterized protein	N	N	0.54
LOC_Os02g09480	MGG_03907	myb-like DNA-binding domain containing protein	Putative uncharacterized protein	N	N	0.58
LOC_Os02g51799	MGG_03907	MYB family transcription factor	Putative uncharacterized protein	N	N	0.51
LOC_Os02g55320	MGG_03907	two-component response regulator	Putative uncharacterized protein	N	N	0.51
LOC_Os03g14810	MGG_03907	MYB-like transcription factor DIVARICATA	Putative uncharacterized protein	N	N	0.61
LOC_Os03g63890	MGG_03907	MYB family transcription factor	Putative uncharacterized protein	N	N	0.64
LOC_Os04g27410	MGG_03907	MYB family transcription factor	Putative uncharacterized protein	N	N	0.53
LOC_Os04g39090	MGG_03907	SAM domain containing protein	Putative uncharacterized protein	N	N	0.55
LOC_Os04g58020	MGG_03907	MYB_Al protein	Putative uncharacterized protein	N	N	0.79
LOC_Os05g34110	MGG_03907	homeodomain-related	Putative uncharacterized protein	N	N	0.54
LOC_Os05g35500	MGG_03907	MYB family transcription factor	Putative uncharacterized protein	N	N	0.62
LOC_Os05g37050	MGG_03907	MYB family transcription factor	Putative uncharacterized protein	N	N	0.59
LOC_Os05g49240	MGG_03907	homeodomain-related	Putative uncharacterized protein	N	N	0.61
LOC_Os06g08440	MGG_03907	two-component response regulator	Putative uncharacterized protein	N	N	0.51
LOC_Os06g24070	MGG_03907	myb-like DNA-binding domain containing protein	Putative uncharacterized protein	N	N	0.51
LOC_Os06g43910	MGG_03907	two-component response regulator	Putative uncharacterized protein	N	N	0.51
LOC_Os07g02300	MGG_03907	tetratricopeptide repeat domain containing protein	Putative uncharacterized protein	N	N	0.51
LOC_Os07g25370	MGG_03907	myb-like DNA-binding domain containing protein	Putative uncharacterized protein	N	N	0.56
LOC_Os07g26150	MGG_03907	MYB family transcription factor	Putative uncharacterized protein	N	N	0.61
LOC_Os08g05520	MGG_03907	myb-like DNA-binding domain containing protein	Putative uncharacterized protein	N	N	0.59
LOC_Os08g31814	MGG_03907	OsAPRL4 adenosine 5'-phosphosulfate reductase-like OsAPRL4	Putative uncharacterized protein	N	N	0.51
LOC_Os08g41480	MGG_03907	SAM domain containing protein	Putative uncharacterized protein	N	N	0.58
LOC_Os10g41200	MGG_03907	MYB family transcription factor	Putative uncharacterized protein	N	N	0.54
LOC_Os12g03150	MGG_03907	myb-like DNA-binding domain containing protein	Putative uncharacterized protein	N	N	0.51
LOC_Os12g33950	MGG_03907	MYB family transcription factor	Putative uncharacterized protein	N	N	0.57
LOC_Os01g34080	MGG_03926	armadillo/beta-catenin-like repeat family protein	Cell division protease ftsH	N	N	0.57
LOC_Os01g43150	MGG_03926	OsFtsH9 FtsH protease, homologue of AtFtsH11	Cell division protease ftsH	Y	Y	0.67
LOC_Os01g62500	MGG_03926	OsFtsH3 FtsH protease, homologue of AtFtsH3/10	Cell division protease ftsH	Y	N	0.61
LOC_Os02g21970	MGG_03926	26S protease regulatory subunit 6B	Cell division protease ftsH	Y	N	0.515
LOC_Os02g27060	MGG_03926	high mobility group	Cell division protease ftsH	N	N	0.54
LOC_Os02g43350	MGG_03926	OsFtsH7 FtsH protease, homologue of AtFtsH7	Cell division protease ftsH	Y	Y	0.63
LOC_Os02g54340	MGG_03926	26S protease regulatory subunit 7	Cell division protease ftsH	Y	N	0.535
LOC_Os03g10770	MGG_03926	helix-loop-helix DNA-binding domain containing protein	Cell division protease ftsH	N	N	0.6
LOC_Os03g60530	MGG_03926	ras-related protein	Cell division protease ftsH	N	N	0.56
LOC_Os05g34050	MGG_03926	bZIP transcription factor domain containing protein	Cell division protease ftsH	N	N	0.53
LOC_Os05g38400	MGG_03926	OsFtsH8 FtsH protease, homologue of AtFtsH3/10	Cell division protease ftsH	Y	N	0.61
LOC_Os06g09290	MGG_03926	26S protease regulatory subunit 7	Cell division protease ftsH	Y	N	0.535
LOC_Os06g39870	MGG_03926	26S protease regulatory subunit 8	Cell division protease ftsH	Y	N	0.505
LOC_Os06g45820	MGG_03926	OsFtsH2 FtsH protease, homologue of AtFtsH2/8	Cell division protease ftsH	Y	Y	0.52
LOC_Os06g50900	MGG_03926	expressed protein	Cell division protease ftsH	N	N	0.53
LOC_Os07g13530	MGG_03926	ras-related protein	Cell division protease ftsH	N	N	0.56
LOC_Os07g33410	MGG_03926	ATPase, AAA family protein	Cell division protease ftsH	Y	N	0.6
LOC_Os08g38210	MGG_03926	transcription factor BIM2	Cell division protease ftsH	N	N	0.63
LOC_Os10g30719	MGG_03926	MYB family transcription factor	Cell division protease ftsH	N	N	0.51
LOC_Os11g18670	MGG_03926	ubiquitin family protein	Cell division protease ftsH	Y	N	0.79
LOC_Os12g06520	MGG_03926	bZIP transcription factor domain containing protein	Cell division protease ftsH	N	N	0.57
LOC_Os05g49230	MGG_03930	ribosomal RNA large subunit methyltransferase J	Cytochrome-c oxidase chain VIIc	N	N	0.7
LOC_Os02g14910	MGG_03990	bZIP transcription factor family protein	Dol-P-Glc:Glc(2)Man(9)GlcNAc(2)-PP-Dol alpha-1,2-glucosyltransferase	N	N	0.61
LOC_Os02g03580	MGG_04002	transcription factor	Putative uncharacterized protein	N	N	0.51
LOC_Os07g10890	MGG_04002	transcription factor	Putative uncharacterized protein	N	N	0.55
LOC_Os02g13990	MGG_04018	U2 small nuclear ribonucleoprotein A	Mitochondrial chaperone BCS1	N	N	0.63
LOC_Os02g33080	MGG_04018	N-carbamoylputrescine amidase	Mitochondrial chaperone BCS1	N	N	0.54
LOC_Os03g14280	MGG_04018	ATP-dependent Clp protease ATP-binding subunit	Mitochondrial chaperone BCS1	Y	N	0.81
LOC_Os03g15810	MGG_04018	AAA-type ATPase family protein	Mitochondrial chaperone BCS1	Y	N	0.7
LOC_Os05g30140	MGG_04018	RNA recognition motif containing protein	Mitochondrial chaperone BCS1	N	N	0.61
LOC_Os09g37720	MGG_04018	RNA recognition motif containing protein	Mitochondrial chaperone BCS1	N	N	0.54
LOC_Os12g31830	MGG_04018	nitrilase	Mitochondrial chaperone BCS1	N	N	0.64
LOC_Os12g41820	MGG_04031	heat shock protein DnaJ	Putative uncharacterized protein	N	N	0.67
LOC_Os03g57760	MGG_04050	25.3 kDa vesicle transport protein	Protein transporter SEC22	Y	N	0.51
LOC_Os01g17260	MGG_04054	transcription factor	Vacuolar protein sorting 55 superfamily protein	N	N	0.75
LOC_Os01g59350	MGG_04054	transcription factor	Vacuolar protein sorting 55 superfamily protein	N	N	0.55
LOC_Os01g64730	MGG_04054	bZIP transcription factor domain containing protein	Vacuolar protein sorting 55 superfamily protein	N	N	0.51
LOC_Os07g10890	MGG_04054	transcription factor	Vacuolar protein sorting 55 superfamily protein	N	N	0.56
LOC_Os07g48820	MGG_04054	transcription factor	Vacuolar protein sorting 55 superfamily protein	N	N	0.52
LOC_Os10g38820	MGG_04054	bZIP family transcription factor	Vacuolar protein sorting 55 superfamily protein	N	N	0.59
LOC_Os08g44330	MGG_04090	peptidylprolyl isomerase domain and WD repeat-containing protein 1	SNARE protein	N	N	0.59
LOC_Os03g03680	MGG_04099	transporter family protein	Allantoate permease	N	N	0.52
LOC_Os08g17600	MGG_04162	SNARE domain containing protein	Aquaporin	N	N	0.54
LOC_Os02g20850	MGG_04194	ras-related protein	Acetyl esterase	N	N	0.6
LOC_Os07g33850	MGG_04194	ras-related protein	Acetyl esterase	N	N	0.59
LOC_Os10g40950	MGG_04225	polyol transporter 5	MFS quinate transporter	Y	N	0.55
LOC_Os10g40950	MGG_04230	polyol transporter 5	Putative uncharacterized protein	N	N	0.51
LOC_Os01g14870	MGG_04231	zinc finger matrin-type protein 5	Putative uncharacterized protein	N	N	0.51
LOC_Os01g34080	MGG_04231	armadillo/beta-catenin-like repeat family protein	Putative uncharacterized protein	N	N	0.54
LOC_Os02g15510	MGG_04231	BED zinc finger family protein	Putative uncharacterized protein	N	N	0.55
LOC_Os02g29080	MGG_04231	conserved hypothetical protein	Putative uncharacterized protein	N	N	0.56
LOC_Os02g30540	MGG_04231	protein kinase	Putative uncharacterized protein	N	N	0.79
LOC_Os02g40180	MGG_04231	receptor-like protein kinase 5 precursor	Putative uncharacterized protein	N	N	0.54
LOC_Os02g44134	MGG_04231	thioesterase family protein	Putative uncharacterized protein	N	N	0.52
LOC_Os04g15630	MGG_04231	xa21	Putative uncharacterized protein	N	N	0.81
LOC_Os04g52780	MGG_04231	leucine-rich repeat receptor protein kinase EXS precursor	Putative uncharacterized protein	N	N	0.54
LOC_Os04g53120	MGG_04231	NB-ARC domain containing protein	Putative uncharacterized protein	N	N	0.51
LOC_Os04g58780	MGG_04231	pentatricopeptide repeat protein	Putative uncharacterized protein	N	N	0.55
LOC_Os05g40050	MGG_04231	receptor-like protein kinase 2 precursor	Putative uncharacterized protein	N	N	0.51
LOC_Os05g40270	MGG_04231	expressed protein	Putative uncharacterized protein	N	N	0.54
LOC_Os05g51740	MGG_04231	receptor protein kinase CLAVATA1 precursor	Putative uncharacterized protein	N	N	0.51
LOC_Os06g08710	MGG_04231	receptor-like protein kinase precursor	Putative uncharacterized protein	N	N	0.61
LOC_Os06g09180	MGG_04231	OsMKK5 - putative MAPKK based on amino acid sequence homology	Putative uncharacterized protein	N	N	0.615
LOC_Os06g10230	MGG_04231	receptor-like protein kinase 5 precursor	Putative uncharacterized protein	N	N	0.52
LOC_Os06g36320	MGG_04231	receptor-like protein kinase 5 precursor	Putative uncharacterized protein	N	N	0.74
LOC_Os06g47720	MGG_04231	serine/threonine-protein kinase BRI1-like 2 precursor	Putative uncharacterized protein	N	N	0.56
LOC_Os07g03000	MGG_04231	receptor-like protein kinase precursor	Putative uncharacterized protein	N	N	0.57
LOC_Os07g14820	MGG_04231	expressed protein	Putative uncharacterized protein	N	N	0.62
LOC_Os07g31500	MGG_04231	leucine-rich repeat receptor protein kinase EXS precursor	Putative uncharacterized protein	N	N	0.52
LOC_Os08g13870	MGG_04231	S-locus lectin protein kinase family protein	Putative uncharacterized protein	N	N	0.54
LOC_Os08g25380	MGG_04231	serine/threonine-protein kinase BRI1-like 1 precursor	Putative uncharacterized protein	N	N	0.6
LOC_Os08g42530	MGG_04231	SFC	Putative uncharacterized protein	Y	N	0.516667
LOC_Os10g04580	MGG_04231	ras-related protein	Putative uncharacterized protein	N	N	0.65
LOC_Os10g32990	MGG_04231	receptor-like protein kinase 2 precursor	Putative uncharacterized protein	N	N	0.53
LOC_Os11g12620	MGG_04231	receptor protein kinase CLAVATA1 precursor	Putative uncharacterized protein	N	N	0.56
LOC_Os11g36140	MGG_04231	receptor-like protein kinase 2 precursor	Putative uncharacterized protein	N	N	0.53
LOC_Os11g39420	MGG_04231	jacalin-like lectin domain containing protein	Putative uncharacterized protein	N	N	0.58
LOC_Os04g23890	MGG_04242	AGC_PVPK_like_kin82y.10 - ACG kinases include homologs to PKA, PKG and PKC	Bax Inhibitor family protein	N	N	0.55
LOC_Os02g48790	MGG_04298	AML1	Putative uncharacterized protein	N	N	0.51
LOC_Os03g49170	MGG_04305	zinc finger family protein	Cell wall glycosyl hydrolase YteR	N	N	0.52
LOC_Os11g28610	MGG_04329	transporter family protein	Putative uncharacterized protein	N	N	0.52
LOC_Os10g12080	MGG_04349	cytochrome P450	Cytochrome P450	Y	N	0.53
LOC_Os01g03914	MGG_04407	cation efflux family protein	Cation efflux family protein	Y	N	0.79
LOC_Os01g62070	MGG_04407	cation efflux family protein	Cation efflux family protein	Y	N	0.82
LOC_Os02g53490	MGG_04407	cation efflux family protein	Cation efflux family protein	Y	N	0.85
LOC_Os03g12530	MGG_04407	cation efflux family protein	Cation efflux family protein	Y	N	0.85
LOC_Os03g22550	MGG_04407	cation efflux family protein	Cation efflux family protein	Y	N	0.753333
LOC_Os05g38670	MGG_04407	cation efflux family protein	Cation efflux family protein	Y	N	0.53
LOC_Os04g09430	MGG_04432	cytochrome P450	Cytochrome P450 51	Y	N	0.54
LOC_Os06g43440	MGG_04432	cytochrome P450	Cytochrome P450 51	Y	N	0.63
LOC_Os01g61070	MGG_04433	heavy metal-associated domain containing protein	Sulfate transporter	N	N	0.56
LOC_Os01g50690	MGG_04439	WD domain, G-beta repeat domain containing protein	Endosomal protein P24B	N	N	0.575
LOC_Os01g69970	MGG_04439	WD domain, G-beta repeat domain containing protein	Endosomal protein P24B	N	N	0.52
LOC_Os02g48964	MGG_04439	WD-40 repeat family protein	Endosomal protein P24B	N	N	0.61
LOC_Os03g64110	MGG_04439	WD domain, G-beta repeat domain containing protein	Endosomal protein P24B	N	N	0.57
LOC_Os06g07540	MGG_04439	WD-40 repeat family protein	Endosomal protein P24B	N	N	0.5675
LOC_Os12g41620	MGG_04439	WD domain, G-beta repeat domain containing protein	Endosomal protein P24B	N	N	0.74
LOC_Os01g46970	MGG_04454	transcription factor	Transporter GOS1	N	N	0.63
LOC_Os02g10140	MGG_04454	bZIP transcription factor domain containing protein	Transporter GOS1	N	N	0.55
LOC_Os07g08420	MGG_04454	bZIP transcription factor domain containing protein	Transporter GOS1	N	N	0.55
LOC_Os01g03510	MGG_04474	WD domain, G-beta repeat domain containing protein	Inositol phosphosphingolipids phospholipase C	N	N	0.67
LOC_Os03g64110	MGG_04474	WD domain, G-beta repeat domain containing protein	Inositol phosphosphingolipids phospholipase C	N	N	0.51
LOC_Os04g50660	MGG_04474	WD domain, G-beta repeat domain containing protein	Inositol phosphosphingolipids phospholipase C	N	N	0.54
LOC_Os05g47890	MGG_04474	WD domain, G-beta repeat domain containing protein	Inositol phosphosphingolipids phospholipase C	N	N	0.54
LOC_Os06g43690	MGG_04474	WD repeat-containing protein	Inositol phosphosphingolipids phospholipase C	N	N	0.62
LOC_Os09g10820	MGG_04474	oxidoreductase domain protein	Inositol phosphosphingolipids phospholipase C	N	N	0.54
LOC_Os03g03680	MGG_04511	transporter family protein	MFS transporter	N	N	0.55
LOC_Os01g59760	MGG_04534	bZIP transcription factor	Chitinase	N	N	0.61
LOC_Os03g47200	MGG_04534	bZIP transcription factor domain containing protein	Chitinase	N	N	0.71
LOC_Os04g01600	MGG_04534	erythronate-4-phosphate dehydrogenase domain containing protein	Chitinase	N	N	0.56
LOC_Os04g01650	MGG_04534	erythronate-4-phosphate dehydrogenase domain containing protein	Chitinase	N	N	0.53
LOC_Os04g01660	MGG_04534	erythronate-4-phosphate dehydrogenase domain containing protein	Chitinase	N	N	0.7
LOC_Os06g29220	MGG_04534	erythronate-4-phosphate dehydrogenase domain containing protein	Chitinase	N	N	0.59
LOC_Os06g39960	MGG_04534	bZIP transcription factor domain containing protein	Chitinase	N	N	0.52
LOC_Os07g16040	MGG_04534	erythronate-4-phosphate dehydrogenase domain containing protein	Chitinase	N	N	0.59
LOC_Os04g08836	MGG_04605	cytochrome P450 79A1	Cytochrome P450 3A12	Y	N	0.514
LOC_Os01g03914	MGG_04623	cation efflux family protein	Cation efflux family protein	Y	N	0.63
LOC_Os01g62070	MGG_04623	cation efflux family protein	Cation efflux family protein	Y	N	0.69
LOC_Os02g53490	MGG_04623	cation efflux family protein	Cation efflux family protein	Y	N	0.58
LOC_Os03g12530	MGG_04623	cation efflux family protein	Cation efflux family protein	Y	N	0.67
LOC_Os03g22550	MGG_04623	cation efflux family protein	Cation efflux family protein	Y	N	0.68
LOC_Os06g43440	MGG_04628	cytochrome P450	Cytochrome P450 51	Y	N	0.51
LOC_Os01g68020	MGG_04704	BTBZ2 - Bric-a-Brac, Tramtrack, and Broad Complex BTB domain with TAZ zinc finger and Calmodulin-binding domains	Chitooligosaccharide deacetylase	N	N	0.55
LOC_Os03g46440	MGG_04704	BTBA4 - Bric-a-Brac,Tramtrack, Broad Complex BTB domain with Ankyrin repeat region	Chitooligosaccharide deacetylase	N	N	0.73
LOC_Os07g15490	MGG_04704	C2-BTB1 - Bric-a-Brac, Tramtrack, Broad Complex BTB domain with C2 subfamily conserved sequence	Chitooligosaccharide deacetylase	N	N	0.53
LOC_Os09g16870	MGG_04704	A3-BTB2 - Bric-a-Brac, Tramtrack, Broad Complex BTB domain with A3 subfamily conserved sequence	Chitooligosaccharide deacetylase	N	N	0.64
LOC_Os11g03530	MGG_04704	ELMO/CED-12 family protein	Chitooligosaccharide deacetylase	N	N	0.59
LOC_Os12g02030	MGG_04704	BTB9 - Bric-a-Brac, Tramtrack, Broad Complex BTB domain	Chitooligosaccharide deacetylase	N	N	0.52
LOC_Os02g06640	MGG_04715	ubiquitin family protein	Putative uncharacterized protein	N	N	0.54
LOC_Os06g46770	MGG_04715	ubiquitin family protein	Putative uncharacterized protein	N	N	0.52
LOC_Os08g08790	MGG_04715	ubiquitin family protein	Putative uncharacterized protein	N	N	0.57
LOC_Os01g04870	MGG_04733	WD domain, G-beta repeat domain containing protein	Alkaline protease	N	N	0.7
LOC_Os01g09252	MGG_04733	WD domain, G-beta repeat domain containing protein	Alkaline protease	N	N	0.54
LOC_Os02g04320	MGG_04733	WD domain, G-beta repeat domain containing protein	Alkaline protease	N	N	0.63
LOC_Os03g42770	MGG_04733	expressed protein	Alkaline protease	N	N	0.54
LOC_Os01g04580	MGG_04746	Ser/Thr protein kinase	DOM34-interacting protein 2	N	N	0.65
LOC_Os01g21960	MGG_04746	serine/threonine-protein kinase	DOM34-interacting protein 2	N	N	0.51
LOC_Os01g26210	MGG_04746	OsWAK6 - OsWAK receptor-like protein kinase	DOM34-interacting protein 2	N	N	0.56
LOC_Os01g42294	MGG_04746	inactive receptor kinase At2g26730 precursor	DOM34-interacting protein 2	N	N	0.67
LOC_Os01g55440	MGG_04746	CAMK_KIN1/SNF1/Nim1_like.1 - CAMK includes calcium/calmodulin depedent protein kinases	DOM34-interacting protein 2	N	N	0.51
LOC_Os01g56580	MGG_04746	CK1_CaseinKinase_1a.3 - CK1 includes the casein kinase 1 kinases	DOM34-interacting protein 2	N	N	0.62
LOC_Os01g66250	MGG_04746	S-locus-like receptor protein kinase	DOM34-interacting protein 2	N	N	0.61
LOC_Os03g16430	MGG_04746	RNA polymerase sigma factor	DOM34-interacting protein 2	N	N	0.55
LOC_Os03g21140	MGG_04746	RNA-binding zinc finger protein	DOM34-interacting protein 2	Y	N	0.53
LOC_Os04g03830	MGG_04746	OsWAK29 - OsWAK receptor-like protein kinase	DOM34-interacting protein 2	N	N	0.6
LOC_Os05g03460	MGG_04746	protein kinase	DOM34-interacting protein 2	N	N	0.57
LOC_Os05g40050	MGG_04746	receptor-like protein kinase 2 precursor	DOM34-interacting protein 2	N	N	0.69
LOC_Os06g02980	MGG_04746	ATP synthase F1, epsilon subunit family protein	DOM34-interacting protein 2	N	N	0.55
LOC_Os06g03970	MGG_04746	receptor-like protein kinase 5 precursor	DOM34-interacting protein 2	N	N	0.57
LOC_Os06g21330	MGG_04746	ABB1 - Ankyrin repeat region with 2 Bric-a-Brac, Tramtrack, Broad Complex BTB domains	DOM34-interacting protein 2	N	N	0.67
LOC_Os06g27890	MGG_04746	STE_MEK_ste7_MAP2K.8 - STE kinases include homologs to sterile 7, sterile 11 and sterile 20 from yeast	DOM34-interacting protein 2	N	N	0.53
LOC_Os06g35850	MGG_04746	lectin protein kinase family protein	DOM34-interacting protein 2	N	N	0.54
LOC_Os06g41560	MGG_04746	receptor-like protein kinase	DOM34-interacting protein 2	N	N	0.55
LOC_Os06g47880	MGG_04746	cell division control protein 2 homolog 3	DOM34-interacting protein 2	N	N	0.73
LOC_Os07g30090	MGG_04746	actin-depolymerizing factor	DOM34-interacting protein 2	N	N	0.52
LOC_Os07g38530	MGG_04746	STE_PAK_Ste20_Slob_Wnk.4 - STE kinases include homologs to sterile 7, sterile 11 and sterile 20 from yeast	DOM34-interacting protein 2	N	N	0.56
LOC_Os09g29520	MGG_04746	OsWAK81 - OsWAK receptor-like cytoplasmic kinase OsWAK-RLCK	DOM34-interacting protein 2	N	N	0.55
LOC_Os09g36290	MGG_04746	Ser/Thr protein phosphatase family protein	DOM34-interacting protein 2	N	N	0.59
LOC_Os10g29360	MGG_04746	BTB/POZ domain containing protein	DOM34-interacting protein 2	N	N	0.51
LOC_Os10g39720	MGG_04746	homeobox domain containing protein	DOM34-interacting protein 2	N	N	0.536
LOC_Os11g07160	MGG_04746	receptor protein kinase CLAVATA1 precursor	DOM34-interacting protein 2	N	N	0.53
LOC_Os11g07260	MGG_04746	expressed protein	DOM34-interacting protein 2	N	N	0.54
LOC_Os11g11490	MGG_04746	TKL_IRAK_CR4L.7 - The CR4L subfamily has homology with Crinkly4	DOM34-interacting protein 2	N	N	0.52
LOC_Os11g19490	MGG_04746	expressed protein	DOM34-interacting protein 2	N	N	0.7
LOC_Os11g26160	MGG_04746	RNA polymerase sigma factor	DOM34-interacting protein 2	N	N	0.51
LOC_Os11g39370	MGG_04746	BRASSINOSTEROID INSENSITIVE 1-associated receptor kinase 1 precursor	DOM34-interacting protein 2	N	N	0.54
LOC_Os11g40890	MGG_04746	expressed protein	DOM34-interacting protein 2	N	N	0.54
LOC_Os01g01150	MGG_04816	RNA recognition motif	Putative uncharacterized protein	Y	N	0.54
LOC_Os01g16090	MGG_04816	RNA binding protein	Putative uncharacterized protein	Y	N	0.66
LOC_Os01g21420	MGG_04816	pre-mRNA-splicing factor SF2	Putative uncharacterized protein	Y	N	0.66
LOC_Os01g31810	MGG_04816	RNA recognition motif containing protein	Putative uncharacterized protein	Y	N	0.59
LOC_Os01g34190	MGG_04816	G-patch domain containing protein	Putative uncharacterized protein	N	N	0.59
LOC_Os01g50020	MGG_04816	expressed protein	Putative uncharacterized protein	N	N	0.55
LOC_Os01g64770	MGG_04816	polypyrimidine tract-binding protein	Putative uncharacterized protein	Y	N	0.55
LOC_Os01g65530	MGG_04816	RNA recognition motif containing protein	Putative uncharacterized protein	Y	N	0.55
LOC_Os01g71200	MGG_04816	RNA recognition motif containing protein	Putative uncharacterized protein	Y	N	0.64
LOC_Os01g71770	MGG_04816	RNA recognition motif containing protein	Putative uncharacterized protein	Y	N	0.55
LOC_Os01g72834	MGG_04816	RNA recognition motif containing protein	Putative uncharacterized protein	Y	N	0.65
LOC_Os01g74340	MGG_04816	RNA recognition motif containing protein	Putative uncharacterized protein	Y	N	0.53
LOC_Os02g01480	MGG_04816	nucleic acid binding protein	Putative uncharacterized protein	Y	N	0.61
LOC_Os02g03040	MGG_04816	RNA recognition motif containing protein	Putative uncharacterized protein	Y	N	0.53
LOC_Os02g07070	MGG_04816	RNA recognition motif family protein	Putative uncharacterized protein	Y	N	0.69
LOC_Os02g11750	MGG_04816	RNA recognition motif containing protein	Putative uncharacterized protein	Y	N	0.61
LOC_Os02g27350	MGG_04816	expressed protein	Putative uncharacterized protein	N	N	0.57
LOC_Os02g48340	MGG_04816	RNA recognition motif containing protein	Putative uncharacterized protein	Y	N	0.59
LOC_Os02g51890	MGG_04816	RNA recognition motif containing protein	Putative uncharacterized protein	Y	N	0.6
LOC_Os02g52140	MGG_04816	RNA recognition motif containing protein	Putative uncharacterized protein	Y	N	0.55
LOC_Os02g54690	MGG_04816	RNA recognition motif containing protein	Putative uncharacterized protein	Y	N	0.57
LOC_Os02g54790	MGG_04816	expressed protein	Putative uncharacterized protein	N	N	0.57
LOC_Os02g57530	MGG_04816	ethylene receptor	Putative uncharacterized protein	N	N	0.544
LOC_Os03g04780	MGG_04816	RNA recognition motif containing protein	Putative uncharacterized protein	Y	N	0.55
LOC_Os03g10990	MGG_04816	retinoblastoma-binding protein-like	Putative uncharacterized protein	N	N	0.53
LOC_Os03g14190	MGG_04816	RNA recognition motif containing protein	Putative uncharacterized protein	Y	N	0.58
LOC_Os03g15890	MGG_04816	RNA recognition motif containing protein	Putative uncharacterized protein	Y	N	0.69
LOC_Os03g17710	MGG_04816	splicing factor, arginine/serine-rich	Putative uncharacterized protein	Y	N	0.62
LOC_Os03g17760	MGG_04816	RNA recognition motif containing protein	Putative uncharacterized protein	Y	N	0.65
LOC_Os03g21140	MGG_04816	RNA-binding zinc finger protein	Putative uncharacterized protein	Y	N	0.53
LOC_Os03g21160	MGG_04816	RNA-binding zinc finger protein	Putative uncharacterized protein	Y	N	0.54
LOC_Os03g22380	MGG_04816	RNA recognition motif containing protein	Putative uncharacterized protein	Y	N	0.64
LOC_Os03g24890	MGG_04816	RNA recognition motif containing protein	Putative uncharacterized protein	Y	N	0.56
LOC_Os03g25770	MGG_04816	RNA recognition motif containing protein	Putative uncharacterized protein	Y	N	0.67
LOC_Os03g26630	MGG_04816	SAP domain containing protein	Putative uncharacterized protein	Y	N	0.71
LOC_Os03g40310	MGG_04816	RNA recognition motif containing protein	Putative uncharacterized protein	Y	N	0.53
LOC_Os03g44484	MGG_04816	DNA-directed RNA polymerase II subunit RPB2	Putative uncharacterized protein	N	N	0.73
LOC_Os03g46770	MGG_04816	RNA recognition motif containing protein	Putative uncharacterized protein	Y	N	0.69
LOC_Os03g47800	MGG_04816	RNA recognition motif containing protein	Putative uncharacterized protein	Y	N	0.65
LOC_Os03g53770	MGG_04816	RNA recognition motif containing protein	Putative uncharacterized protein	Y	N	0.52
LOC_Os03g56020	MGG_04816	RNA recognition motif containing protein	Putative uncharacterized protein	Y	N	0.54
LOC_Os03g58720	MGG_04816	RNA recognition motif containing protein	Putative uncharacterized protein	Y	N	0.51
LOC_Os03g59550	MGG_04816	RNA recognition motif containing protein	Putative uncharacterized protein	Y	N	0.61
LOC_Os03g59710	MGG_04816	RNA recognition motif containing protein	Putative uncharacterized protein	Y	N	0.63
LOC_Os03g60930	MGG_04816	RNA recognition motif containing protein	Putative uncharacterized protein	Y	N	0.55
LOC_Os03g61110	MGG_04816	RNA-binding motif protein	Putative uncharacterized protein	Y	N	0.52
LOC_Os03g61990	MGG_04816	glycine-rich RNA-binding protein 7	Putative uncharacterized protein	Y	N	0.65
LOC_Os04g01860	MGG_04816	cysteine-rich receptor-like protein kinase 7 precursor	Putative uncharacterized protein	Y	N	0.63
LOC_Os04g10250	MGG_04816	expressed protein	Putative uncharacterized protein	N	N	0.59
LOC_Os04g24170	MGG_04816	RNA recognition motif containing protein	Putative uncharacterized protein	Y	N	0.54
LOC_Os04g25550	MGG_04816	FACT complex subunit SPT16	Putative uncharacterized protein	N	N	0.53
LOC_Os04g33810	MGG_04816	RNA recognition motif containing protein	Putative uncharacterized protein	Y	N	0.52
LOC_Os04g37690	MGG_04816	RNA recognition motif containing protein	Putative uncharacterized protein	Y	N	0.56
LOC_Os04g39250	MGG_04816	RNA recognition motif family protein	Putative uncharacterized protein	Y	N	0.64
LOC_Os04g39629	MGG_04816	RNA recognition motif containing protein	Putative uncharacterized protein	Y	N	0.6
LOC_Os04g41910	MGG_04816	RNA recognition motif containing protein	Putative uncharacterized protein	Y	N	0.53
LOC_Os04g42010	MGG_04816	RNA binding protein	Putative uncharacterized protein	Y	N	0.55
LOC_Os04g43150	MGG_04816	nuclear transport factor 2	Putative uncharacterized protein	N	N	0.56
LOC_Os04g45930	MGG_04816	RNA recognition motif containing protein	Putative uncharacterized protein	Y	N	0.53
LOC_Os04g52200	MGG_04816	RNA recognition motif containing protein	Putative uncharacterized protein	Y	N	0.69
LOC_Os04g52960	MGG_04816	nucleolin	Putative uncharacterized protein	Y	N	0.64
LOC_Os04g53440	MGG_04816	RNA recognition motif containing protein	Putative uncharacterized protein	Y	N	0.74
LOC_Os04g54440	MGG_04816	RNA binding protein	Putative uncharacterized protein	Y	N	0.57
LOC_Os04g54870	MGG_04816	RNA recognition motif containing protein	Putative uncharacterized protein	Y	N	0.53
LOC_Os05g01240	MGG_04816	AML1	Putative uncharacterized protein	Y	N	0.54
LOC_Os05g01540	MGG_04816	serine/arginine repetitive matrix protein 1	Putative uncharacterized protein	Y	N	0.55
LOC_Os05g02400	MGG_04816	RNA recognition motif containing protein	Putative uncharacterized protein	Y	N	0.64
LOC_Os05g04850	MGG_04816	RNA recognition motif containing protein	Putative uncharacterized protein	Y	N	0.6
LOC_Os05g06280	MGG_04816	ATKINESIN-13A/KINESIN-13A	Putative uncharacterized protein	Y	N	0.67
LOC_Os05g07000	MGG_04816	splicing factor, arginine/serine-rich 7	Putative uncharacterized protein	Y	N	0.71
LOC_Os05g13620	MGG_04816	RNA recognition motif containing protein	Putative uncharacterized protein	Y	N	0.67
LOC_Os05g13630	MGG_04816	RNA recognition motif containing protein	Putative uncharacterized protein	Y	N	0.72
LOC_Os05g13650	MGG_04816	RNA recognition motif containing protein	Putative uncharacterized protein	Y	N	0.71
LOC_Os05g23800	MGG_04816	RNA recognition motif containing protein	Putative uncharacterized protein	Y	N	0.52
LOC_Os05g30140	MGG_04816	RNA recognition motif containing protein	Putative uncharacterized protein	Y	N	0.55
LOC_Os05g30980	MGG_04816	RNA recognition motif containing protein	Putative uncharacterized protein	Y	N	0.66
LOC_Os05g36120	MGG_04816	polypyrimidine tract-binding protein	Putative uncharacterized protein	Y	N	0.54
LOC_Os06g02240	MGG_04816	RNA recognition motif containing protein	Putative uncharacterized protein	Y	N	0.65
LOC_Os06g05800	MGG_04816	RNA recognition motif containing protein	Putative uncharacterized protein	Y	N	0.65
LOC_Os06g06310	MGG_04816	expressed protein	Putative uncharacterized protein	N	N	0.51
LOC_Os06g08840	MGG_04816	RNA recognition motif containing protein	Putative uncharacterized protein	Y	N	0.53
LOC_Os06g11730	MGG_04816	RNA recognition motif containing protein	Putative uncharacterized protein	Y	N	0.7
LOC_Os06g13839	MGG_04816	RNA recognition motif containing protein	Putative uncharacterized protein	Y	N	0.6
LOC_Os06g13999	MGG_04816	RNA recognition motif containing protein	Putative uncharacterized protein	Y	N	0.6
LOC_Os06g47300	MGG_04816	RNA recognition motif containing protein	Putative uncharacterized protein	Y	N	0.54
LOC_Os06g50890	MGG_04816	RNA recognition motif containing protein	Putative uncharacterized protein	Y	N	0.56
LOC_Os07g03240	MGG_04816	RNA recognition motif containing protein	Putative uncharacterized protein	Y	N	0.53
LOC_Os07g04630	MGG_04816	expressed protein	Putative uncharacterized protein	Y	N	0.54
LOC_Os07g08320	MGG_04816	RNA recognition motif containing protein	Putative uncharacterized protein	Y	N	0.62
LOC_Os07g08960	MGG_04816	RNA recognition motif containing protein	Putative uncharacterized protein	Y	N	0.67
LOC_Os07g09490	MGG_04816	ATPase	Putative uncharacterized protein	N	N	0.54
LOC_Os07g13280	MGG_04816	RNA recognition motif containing protein	Putative uncharacterized protein	Y	N	0.52
LOC_Os07g18050	MGG_04816	RNA-binding motif protein	Putative uncharacterized protein	Y	N	0.51
LOC_Os07g19560	MGG_04816	TATA-binding protein-associated factor 2N	Putative uncharacterized protein	Y	N	0.74
LOC_Os07g25410	MGG_04816	peptidase, M24 family protein	Putative uncharacterized protein	N	N	0.53
LOC_Os07g33330	MGG_04816	RNA recognition motif containing protein	Putative uncharacterized protein	Y	N	0.74
LOC_Os07g36490	MGG_04816	RNA recognition motif containing protein	Putative uncharacterized protein	Y	N	0.71
LOC_Os07g39560	MGG_04816	RNA recognition motif containing protein	Putative uncharacterized protein	Y	N	0.56
LOC_Os07g41120	MGG_04816	RNA recognition motif containing protein	Putative uncharacterized protein	Y	N	0.64
LOC_Os07g42380	MGG_04816	RNA recognition motif containing protein	Putative uncharacterized protein	Y	N	0.56
LOC_Os07g43950	MGG_04816	RNA recognition motif containing protein	Putative uncharacterized protein	Y	N	0.59
LOC_Os07g46820	MGG_04816	CUG-BP- and ETR-3-like factor 5	Putative uncharacterized protein	Y	N	0.72
LOC_Os07g47630	MGG_04816	RNA recognition motif containing protein	Putative uncharacterized protein	Y	N	0.6
LOC_Os07g48410	MGG_04816	RNA-binding zinc finger protein	Putative uncharacterized protein	Y	N	0.61
LOC_Os08g09100	MGG_04816	RNA recognition motif containing protein	Putative uncharacterized protein	Y	N	0.74
LOC_Os08g09350	MGG_04816	gar2	Putative uncharacterized protein	Y	N	0.58
LOC_Os08g15080	MGG_04816	proline rich protein 3	Putative uncharacterized protein	Y	N	0.61
LOC_Os08g29650	MGG_04816	RNA recognition motif containing protein	Putative uncharacterized protein	Y	N	0.56
LOC_Os08g31620	MGG_04816	expressed protein	Putative uncharacterized protein	N	N	0.565
LOC_Os08g31810	MGG_04816	RNA recognition motif containing protein	Putative uncharacterized protein	Y	N	0.54
LOC_Os08g37960	MGG_04816	RNA recognition motif containing protein	Putative uncharacterized protein	Y	N	0.68
LOC_Os08g38410	MGG_04816	RNA recognition motif containing protein	Putative uncharacterized protein	Y	N	0.6
LOC_Os08g40880	MGG_04816	RNA recognition motif containing protein	Putative uncharacterized protein	Y	N	0.56
LOC_Os08g43360	MGG_04816	RNA recognition motif containing protein	Putative uncharacterized protein	Y	N	0.71
LOC_Os08g45240	MGG_04816	RNA recognition motif containing protein	Putative uncharacterized protein	Y	N	0.53
LOC_Os09g03610	MGG_04816	flowering time control protein FCA	Putative uncharacterized protein	Y	N	0.52
LOC_Os09g12800	MGG_04816	zinc finger Ran-binding domain-containing protein 2	Putative uncharacterized protein	Y	N	0.84
LOC_Os09g14550	MGG_04816	RNA recognition motif containing protein	Putative uncharacterized protein	Y	N	0.54
LOC_Os09g28810	MGG_04816	RNA recognition motif containing protein	Putative uncharacterized protein	Y	N	0.515
LOC_Os09g37720	MGG_04816	RNA recognition motif containing protein	Putative uncharacterized protein	Y	N	0.56
LOC_Os09g39180	MGG_04816	RNA recognition motif containing protein	Putative uncharacterized protein	Y	N	0.6
LOC_Os10g06130	MGG_04816	RNA recognition motif containing protein	Putative uncharacterized protein	Y	N	0.59
LOC_Os10g08570	MGG_04816	RNA recognition motif family protein	Putative uncharacterized protein	Y	N	0.57
LOC_Os10g17454	MGG_04816	RNA recognition motif containing protein	Putative uncharacterized protein	Y	N	0.59
LOC_Os10g30370	MGG_04816	RNA recognition motif containing protein	Putative uncharacterized protein	Y	N	0.56
LOC_Os10g31900	MGG_04816	RNA recognition motif containing protein	Putative uncharacterized protein	Y	N	0.54
LOC_Os10g33230	MGG_04816	RNA recognition motif containing protein	Putative uncharacterized protein	Y	N	0.57
LOC_Os10g34170	MGG_04816	glutaredoxin domain containing protein	Putative uncharacterized protein	N	N	0.52
LOC_Os11g03890	MGG_04816	RNA recognition motif containing protein	Putative uncharacterized protein	Y	N	0.57
LOC_Os11g04390	MGG_04816	RNA recognition motif containing protein	Putative uncharacterized protein	Y	N	0.525
LOC_Os11g07490	MGG_04816	RNA recognition motif containing protein	Putative uncharacterized protein	Y	N	0.62
LOC_Os11g10480	MGG_04816	dehydrogenase	Putative uncharacterized protein	N	N	0.59
LOC_Os11g12270	MGG_04816	expressed protein	Putative uncharacterized protein	Y	N	0.514
LOC_Os11g14430	MGG_04816	APOBEC1 complementation factor	Putative uncharacterized protein	Y	N	0.545
LOC_Os11g40510	MGG_04816	RNA recognition motif containing protein	Putative uncharacterized protein	Y	N	0.56
LOC_Os11g41890	MGG_04816	RNA recognition motif containing protein	Putative uncharacterized protein	Y	N	0.58
LOC_Os12g04180	MGG_04816	RNA recognition motif containing protein	Putative uncharacterized protein	Y	N	0.535
LOC_Os12g10470	MGG_04816	expressed protein	Putative uncharacterized protein	N	N	0.56
LOC_Os12g12190	MGG_04816	expressed protein	Putative uncharacterized protein	N	N	0.58
LOC_Os12g19590	MGG_04816	WD domain, G-beta repeat domain containing protein	Putative uncharacterized protein	N	N	0.57
LOC_Os12g31800	MGG_04816	glycine-rich RNA-binding protein 7	Putative uncharacterized protein	Y	N	0.61
LOC_Os12g38800	MGG_04816	RNA recognition motif containing protein	Putative uncharacterized protein	Y	N	0.51
LOC_Os12g43600	MGG_04816	RNA recognition motif containing protein	Putative uncharacterized protein	Y	N	0.7
LOC_Os01g17260	MGG_04850	transcription factor	Putative uncharacterized protein	N	N	0.56
LOC_Os01g57220	MGG_04850	secretory carrier-associated membrane protein	Putative uncharacterized protein	N	N	0.52
LOC_Os02g10860	MGG_04850	bZIP transcription factor domain containing protein	Putative uncharacterized protein	N	N	0.53
LOC_Os08g31560	MGG_04850	WD-40 repeat family protein	Putative uncharacterized protein	N	N	0.62
LOC_Os01g50080	MGG_04855	MDR-like ABC transporter	ATP-dependent bile acid permease	Y	N	0.52
LOC_Os03g59550	MGG_04855	RNA recognition motif containing protein	ATP-dependent bile acid permease	N	N	0.54
LOC_Os04g33700	MGG_04855	ABC transmembrane transporter domain containing protein	ATP-dependent bile acid permease	Y	N	0.52
LOC_Os07g47630	MGG_04893	RNA recognition motif containing protein	Allantoate permease	N	N	0.6
LOC_Os11g28610	MGG_04893	transporter family protein	Allantoate permease	N	N	0.52
LOC_Os01g46970	MGG_04897	transcription factor	Putative uncharacterized protein	N	N	0.56
LOC_Os02g10860	MGG_04897	bZIP transcription factor domain containing protein	Putative uncharacterized protein	N	N	0.55
LOC_Os06g16200	MGG_04897	proteins of unknown function domain containing protein	Putative uncharacterized protein	N	N	0.62
LOC_Os06g39960	MGG_04897	bZIP transcription factor domain containing protein	Putative uncharacterized protein	N	N	0.52
LOC_Os09g33600	MGG_04897	ARF GTPase-activating domain-containing protein	Putative uncharacterized protein	N	N	0.530333
LOC_Os10g39440	MGG_04897	transporter family protein	Putative uncharacterized protein	N	N	0.58
LOC_Os11g27530	MGG_04897	FHA domain containing protein	Putative uncharacterized protein	N	N	0.55
LOC_Os12g13170	MGG_04897	transcription factor	Putative uncharacterized protein	N	N	0.54
LOC_Os12g41370	MGG_04897	RNA recognition motif containing protein	Putative uncharacterized protein	N	N	0.57
LOC_Os07g30990	MGG_04927	ubiquitin family protein	High-affinity nicotinic acid transporter	N	N	0.65
LOC_Os11g28610	MGG_04927	transporter family protein	High-affinity nicotinic acid transporter	N	N	0.51
LOC_Os03g60750	MGG_04967	ribosomal RNA large subunit methyltransferase J	Zinc-regulated transporter 2	N	N	0.51
LOC_Os01g03914	MGG_04968	cation efflux family protein	Putative uncharacterized protein	Y	N	0.55
LOC_Os01g62070	MGG_04968	cation efflux family protein	Putative uncharacterized protein	Y	N	0.59
LOC_Os02g53490	MGG_04968	cation efflux family protein	Putative uncharacterized protein	Y	N	0.56
LOC_Os03g12530	MGG_04968	cation efflux family protein	Putative uncharacterized protein	Y	N	0.59
LOC_Os03g22550	MGG_04968	cation efflux family protein	Putative uncharacterized protein	Y	N	0.65
LOC_Os02g16680	MGG_04972	bZIP transcription factor domain containing protein	Putative uncharacterized protein	N	N	0.61
LOC_Os08g38020	MGG_04972	bZIP transcription factor domain containing protein	Putative uncharacterized protein	N	N	0.63
LOC_Os09g28310	MGG_04972	bZIP transcription factor	Putative uncharacterized protein	N	N	0.62
LOC_Os09g31390	MGG_04972	transcription factor	Putative uncharacterized protein	N	N	0.59
LOC_Os02g55400	MGG_04994	ATPase 8, plasma membrane-type	Plasma membrane H+-ATPase	Y	N	0.6
LOC_Os03g01120	MGG_04994	E1-E2 ATPase domain containing protein	Plasma membrane H+-ATPase	Y	N	0.64
LOC_Os03g08560	MGG_04994	plasma membrane ATPase	Plasma membrane H+-ATPase	Y	N	0.67
LOC_Os03g48310	MGG_04994	plasma membrane ATPase	Plasma membrane H+-ATPase	Y	N	0.58
LOC_Os04g56160	MGG_04994	plasma membrane ATPase	Plasma membrane H+-ATPase	Y	N	0.65
LOC_Os05g25550	MGG_04994	E1-E2 ATPase domain containing protein	Plasma membrane H+-ATPase	Y	N	0.54
LOC_Os06g08310	MGG_04994	plasma membrane ATPase	Plasma membrane H+-ATPase	Y	N	0.68
LOC_Os07g09340	MGG_04994	plasma membrane ATPase	Plasma membrane H+-ATPase	Y	N	0.65
LOC_Os11g29490	MGG_04994	plasma membrane ATPase	Plasma membrane H+-ATPase	Y	N	0.63
LOC_Os11g29750	MGG_04994	plasma membrane ATPase	Plasma membrane H+-ATPase	Y	N	0.62
LOC_Os12g44150	MGG_04994	plasma membrane ATPase	Plasma membrane H+-ATPase	Y	N	0.58
LOC_Os01g50080	MGG_05009	MDR-like ABC transporter	Canalicular multispecific organic anion transporter 2	Y	N	0.54
LOC_Os07g28090	MGG_05009	ABC transporter, ATP-binding protein	Canalicular multispecific organic anion transporter 2	Y	N	0.52
LOC_Os08g05710	MGG_05009	ABC transporter, ATP-binding protein	Canalicular multispecific organic anion transporter 2	Y	N	0.52
LOC_Os01g09800	MGG_05023	BTBA1 - Bric-a-Brac,Tramtrack, Broad Complex BTB domain with Ankyrin repeat region	Chitin deacetylase 1	N	N	0.53
LOC_Os08g13020	MGG_05023	BTB and MATH domain containing protein	Chitin deacetylase 1	N	N	0.54
LOC_Os09g16870	MGG_05023	A3-BTB2 - Bric-a-Brac, Tramtrack, Broad Complex BTB domain with A3 subfamily conserved sequence	Chitin deacetylase 1	N	N	0.52
LOC_Os10g29920	MGG_05023	snRNP protein	Chitin deacetylase 1	N	N	0.65
LOC_Os12g04410	MGG_05023	BTBA6 - Bric-a-Brac,Tramtrack, Broad Complex BTB domain with Ankyrin repeat region	Chitin deacetylase 1	N	N	0.71
LOC_Os01g03510	MGG_05038	WD domain, G-beta repeat domain containing protein	Putative uncharacterized protein	N	N	0.73
LOC_Os03g47650	MGG_05038	ankyrin	Putative uncharacterized protein	N	N	0.55
LOC_Os04g43130	MGG_05038	transcriptional corepressor LEUNIG	Putative uncharacterized protein	N	N	0.58
LOC_Os11g03794	MGG_05038	WD domain, G-beta repeat domain containing protein	Putative uncharacterized protein	N	N	0.53
LOC_Os12g03822	MGG_05038	WD domain, G-beta repeat domain containing protein	Putative uncharacterized protein	N	N	0.57
LOC_Os01g50080	MGG_05044	MDR-like ABC transporter	Canalicular multispecific organic anion transporter 1	Y	N	0.53
LOC_Os01g65530	MGG_05044	RNA recognition motif containing protein	Canalicular multispecific organic anion transporter 1	N	N	0.56
LOC_Os01g68790	MGG_05044	RNA recognition motif containing protein	Canalicular multispecific organic anion transporter 1	N	N	0.61
LOC_Os02g54690	MGG_05044	RNA recognition motif containing protein	Canalicular multispecific organic anion transporter 1	N	N	0.59
LOC_Os03g24890	MGG_05044	RNA recognition motif containing protein	Canalicular multispecific organic anion transporter 1	N	N	0.52
LOC_Os04g33810	MGG_05044	RNA recognition motif containing protein	Canalicular multispecific organic anion transporter 1	N	N	0.58
LOC_Os06g48310	MGG_05044	RNA recognition motif containing protein	Canalicular multispecific organic anion transporter 1	N	N	0.54
LOC_Os07g13280	MGG_05044	RNA recognition motif containing protein	Canalicular multispecific organic anion transporter 1	N	N	0.55
LOC_Os07g28090	MGG_05044	ABC transporter, ATP-binding protein	Canalicular multispecific organic anion transporter 1	Y	N	0.53
LOC_Os09g35850	MGG_05044	RNA recognition motif containing protein	Canalicular multispecific organic anion transporter 1	N	N	0.59
LOC_Os01g12470	MGG_05158	mitochondrial carrier protein	Putative uncharacterized protein	Y	N	0.59
LOC_Os02g13170	MGG_05158	mitochondrial carrier protein	Putative uncharacterized protein	Y	N	0.56
LOC_Os09g33470	MGG_05158	mitochondrial carrier protein	Putative uncharacterized protein	Y	N	0.58
LOC_Os01g61990	MGG_05181	ankyrin repeat-containing protein	Putative uncharacterized protein	N	N	0.58
LOC_Os02g29130	MGG_05181	ankyrin	Putative uncharacterized protein	N	N	0.66
LOC_Os02g29160	MGG_05181	ankyrin	Putative uncharacterized protein	N	N	0.57
LOC_Os02g29210	MGG_05181	ankyrin	Putative uncharacterized protein	N	N	0.57
LOC_Os03g27080	MGG_05181	calmodulin-binding transcription activator 2	Putative uncharacterized protein	N	N	0.85
LOC_Os04g41280	MGG_05181	ankyrin repeat domain containing protein	Putative uncharacterized protein	N	N	0.82
LOC_Os05g23320	MGG_05181	expressed protein	Putative uncharacterized protein	N	N	0.69
LOC_Os06g13120	MGG_05181	expressed protein	Putative uncharacterized protein	N	N	0.58
LOC_Os07g30774	MGG_05181	calmodulin-binding transcription activator 5	Putative uncharacterized protein	N	N	0.77
LOC_Os09g12350	MGG_05181	expressed protein	Putative uncharacterized protein	N	N	0.63
LOC_Os11g08050	MGG_05181	expressed protein	Putative uncharacterized protein	N	N	0.71
LOC_Os11g14630	MGG_05181	expressed protein	Putative uncharacterized protein	N	N	0.56
LOC_Os01g08000	MGG_05190	fibronectin type 3 and ankyrin repeat domains 1 protein	Heavy metal tolerance protein	N	N	0.54
LOC_Os03g06139	MGG_05190	ABC-2 type transporter domain containing protein	Heavy metal tolerance protein	Y	N	0.55
LOC_Os07g18874	MGG_05190	white-brown complex homolog protein 11	Heavy metal tolerance protein	Y	N	0.58
LOC_Os09g03939	MGG_05190	white-brown complex homolog protein 11	Heavy metal tolerance protein	Y	N	0.52
LOC_Os07g40520	MGG_05298	formin-like protein 20	Dual specificity phosphatase catalytic domain-containing protein	Y	N	0.53
LOC_Os09g15370	MGG_05298	expressed protein	Dual specificity phosphatase catalytic domain-containing protein	N	N	0.66
LOC_Os12g12810	MGG_05298	ankyrin repeat family protein	Dual specificity phosphatase catalytic domain-containing protein	N	N	0.65
LOC_Os04g52200	MGG_05309	RNA recognition motif containing protein	Putative uncharacterized protein	N	N	0.5975
LOC_Os11g03890	MGG_05309	RNA recognition motif containing protein	Putative uncharacterized protein	N	N	0.51
LOC_Os01g09590	MGG_05320	myb-like DNA-binding domain containing protein	Translocation protein sec63	N	N	0.52
LOC_Os01g50110	MGG_05320	MYB family transcription factor	Translocation protein sec63	N	N	0.61
LOC_Os01g52410	MGG_05320	myb-like DNA-binding domain containing protein	Translocation protein sec63	N	N	0.68
LOC_Os01g59660	MGG_05320	MYB family transcription factor	Translocation protein sec63	N	N	0.71
LOC_Os01g63160	MGG_05320	MYB family transcription factor	Translocation protein sec63	N	N	0.53
LOC_Os01g74410	MGG_05320	MYB family transcription factor	Translocation protein sec63	N	N	0.77
LOC_Os01g74590	MGG_05320	MYB family transcription factor	Translocation protein sec63	N	N	0.51
LOC_Os02g36890	MGG_05320	MYB family transcription factor	Translocation protein sec63	N	N	0.8
LOC_Os02g40530	MGG_05320	MYB family transcription factor	Translocation protein sec63	N	N	0.51
LOC_Os02g41510	MGG_05320	MYB family transcription factor	Translocation protein sec63	N	N	0.56
LOC_Os02g42870	MGG_05320	MYB family transcription factor	Translocation protein sec63	N	N	0.58
LOC_Os02g49986	MGG_05320	MYB family transcription factor	Translocation protein sec63	N	N	0.53
LOC_Os03g13310	MGG_05320	MYB family transcription factor	Translocation protein sec63	N	N	0.56
LOC_Os03g20090	MGG_05320	MYB family transcription factor	Translocation protein sec63	N	N	0.58
LOC_Os03g56090	MGG_05320	MYB family transcription factor	Translocation protein sec63	N	N	0.67
LOC_Os03g58800	MGG_05320	ATPase	Translocation protein sec63	N	N	0.57
LOC_Os04g40290	MGG_05320	AAA-type ATPase family protein	Translocation protein sec63	N	N	0.61
LOC_Os04g45060	MGG_05320	MYB family transcription factor	Translocation protein sec63	N	N	0.59
LOC_Os04g46010	MGG_05320	PPR repeat domain containing protein	Translocation protein sec63	N	N	0.52
LOC_Os05g03630	MGG_05320	dnaJ domain containing protein	Translocation protein sec63	Y	N	0.7
LOC_Os05g04210	MGG_05320	MYB family transcription factor	Translocation protein sec63	N	N	0.51
LOC_Os05g46610	MGG_05320	myb-like DNA-binding domain containing protein	Translocation protein sec63	N	N	0.56
LOC_Os05g49310	MGG_05320	MYB family transcription factor	Translocation protein sec63	N	N	0.61
LOC_Os06g10350	MGG_05320	MYB family transcription factor	Translocation protein sec63	N	N	0.61
LOC_Os06g11780	MGG_05320	MYB family transcription factor	Translocation protein sec63	N	N	0.58
LOC_Os06g14670	MGG_05320	ODORANT1	Translocation protein sec63	N	N	0.65
LOC_Os07g25370	MGG_05320	myb-like DNA-binding domain containing protein	Translocation protein sec63	N	N	0.51
LOC_Os08g15020	MGG_05320	MYB family transcription factor	Translocation protein sec63	N	N	0.55
LOC_Os08g31870	MGG_05320	cell division cycle protein 48	Translocation protein sec63	N	N	0.63
LOC_Os08g33660	MGG_05320	MYB family transcription factor	Translocation protein sec63	N	N	0.52
LOC_Os08g37970	MGG_05320	MYB family transcription factor	Translocation protein sec63	N	N	0.56
LOC_Os09g26170	MGG_05320	MYB family transcription factor	Translocation protein sec63	N	N	0.53
LOC_Os09g36730	MGG_05320	MYB family transcription factor	Translocation protein sec63	N	N	0.6
LOC_Os10g35660	MGG_05320	MYB family transcription factor	Translocation protein sec63	N	N	0.57
LOC_Os11g35390	MGG_05320	MYB family transcription factor	Translocation protein sec63	N	N	0.52
LOC_Os11g45740	MGG_05320	MYB family transcription factor	Translocation protein sec63	N	N	0.57
LOC_Os11g47460	MGG_05320	MYB family transcription factor	Translocation protein sec63	N	N	0.59
LOC_Os12g07640	MGG_05320	MYB family transcription factor	Translocation protein sec63	N	N	0.57
LOC_Os12g13570	MGG_05320	MYB family transcription factor	Translocation protein sec63	N	N	0.59
LOC_Os03g19340	MGG_05338	WD domain, G-beta repeat domain containing protein	Putative uncharacterized protein	N	N	0.52
LOC_Os01g55549	MGG_05381	homeobox and START domains containing protein	Beta-1,6-galactanase	N	N	0.51
LOC_Os01g07640	MGG_05451	ankyrin	1-acyl-sn-glycerol-3-phosphate acyltransferase 2	N	N	0.63
LOC_Os01g61990	MGG_05451	ankyrin repeat-containing protein	1-acyl-sn-glycerol-3-phosphate acyltransferase 2	N	N	0.54
LOC_Os02g25960	MGG_05451	ankyrin repeat family protein	1-acyl-sn-glycerol-3-phosphate acyltransferase 2	N	N	0.53
LOC_Os03g05260	MGG_05451	ankyrin repeat domain containing protein	1-acyl-sn-glycerol-3-phosphate acyltransferase 2	N	N	0.55
LOC_Os03g17240	MGG_05451	ankyrin repeat-containing protein	1-acyl-sn-glycerol-3-phosphate acyltransferase 2	N	N	0.56
LOC_Os03g18210	MGG_05451	basic helix-loop-helix	1-acyl-sn-glycerol-3-phosphate acyltransferase 2	N	N	0.64
LOC_Os05g20100	MGG_05451	glycerol-3-phosphate acyltransferase	1-acyl-sn-glycerol-3-phosphate acyltransferase 2	N	N	0.6
LOC_Os02g20540	MGG_05483	fasciclin domain containing protein	Putative uncharacterized protein	Y	N	0.53
LOC_Os08g38270	MGG_05483	fasciclin domain containing protein	Putative uncharacterized protein	Y	N	0.52
LOC_Os08g39270	MGG_05483	fasciclin domain containing protein	Putative uncharacterized protein	Y	N	0.54
LOC_Os09g28310	MGG_05533	bZIP transcription factor	Chitinase 1	N	N	0.52
LOC_Os01g70780	MGG_05577	WD40-like domain containing protein	Putative uncharacterized protein	N	N	0.55
LOC_Os03g58570	MGG_05577	WD domain, G-beta repeat domain containing protein	Putative uncharacterized protein	N	N	0.53
LOC_Os01g50100	MGG_05595	ABC transporter, ATP-binding protein	Spermidine/putrescine import ATP-binding protein potA	Y	N	0.53
LOC_Os03g56010	MGG_05595	bZIP transcription factor domain containing protein	Spermidine/putrescine import ATP-binding protein potA	N	N	0.51
LOC_Os12g37580	MGG_05595	ABC transporter, ATP-binding protein	Spermidine/putrescine import ATP-binding protein potA	Y	N	0.54
LOC_Os10g21930	MGG_05663	OsFBK21 - F-box domain and kelch repeat containing protein	Carboxypeptidase Y homolog A	N	N	0.66
LOC_Os01g07376	MGG_05688	thioredoxin	Putative uncharacterized protein	Y	N	0.68
LOC_Os02g34530	MGG_05688	OsPDIL5-3 protein disulfide isomerase PDIL5-3	Putative uncharacterized protein	Y	N	0.52
LOC_Os02g42700	MGG_05688	thioredoxin	Putative uncharacterized protein	Y	N	0.56
LOC_Os02g51850	MGG_05688	OsAPRL3 adenosine 5'-phosphosulfate reductase-like OsAPRL3	Putative uncharacterized protein	Y	N	0.69
LOC_Os04g36640	MGG_05688	dehydration-responsive element-binding protein	Putative uncharacterized protein	Y	N	0.83
LOC_Os04g44830	MGG_05688	thioredoxin	Putative uncharacterized protein	Y	N	0.56
LOC_Os04g53740	MGG_05688	thioredoxin	Putative uncharacterized protein	Y	N	0.56
LOC_Os05g07690	MGG_05688	thioredoxin	Putative uncharacterized protein	Y	N	0.58
LOC_Os05g40190	MGG_05688	thioredoxin	Putative uncharacterized protein	Y	N	0.61
LOC_Os08g29110	MGG_05688	thioredoxin	Putative uncharacterized protein	Y	N	0.54
LOC_Os08g31814	MGG_05688	OsAPRL4 adenosine 5'-phosphosulfate reductase-like OsAPRL4	Putative uncharacterized protein	Y	N	0.56
LOC_Os12g08730	MGG_05688	thioredoxin	Putative uncharacterized protein	Y	N	0.55
LOC_Os06g21930	MGG_05723	inorganic phosphate transporter	Fluconazole resistance protein 1	N	N	0.57
LOC_Os01g46970	MGG_05732	transcription factor	Putative uncharacterized protein	N	N	0.59
LOC_Os01g59760	MGG_05732	bZIP transcription factor	Putative uncharacterized protein	N	N	0.55
LOC_Os09g13570	MGG_05732	CPuORF2 - conserved peptide uORF-containing transcript	Putative uncharacterized protein	N	N	0.56
LOC_Os09g13575	MGG_05732	expressed protein	Putative uncharacterized protein	N	N	0.56
LOC_Os06g43440	MGG_05787	cytochrome P450	Putative uncharacterized protein	Y	N	0.55
LOC_Os07g19130	MGG_05787	cytochrome P450	Putative uncharacterized protein	Y	N	0.65
LOC_Os10g37034	MGG_05787	cytochrome P450	Putative uncharacterized protein	Y	N	0.68
LOC_Os01g39250	MGG_05874	OsFtsH4 FtsH protease, homologue of AtFtsH4	Putative uncharacterized protein	N	N	0.53
LOC_Os07g33410	MGG_05874	ATPase, AAA family protein	Putative uncharacterized protein	N	N	0.69
LOC_Os06g07200	MGG_05880	syntaxin	Putative uncharacterized protein	N	N	0.55
LOC_Os07g07000	MGG_05880	syntaxin	Putative uncharacterized protein	N	N	0.56
LOC_Os02g21750	MGG_06024	MDR-like ABC transporter	ABC transporter	Y	N	0.57
LOC_Os06g23460	MGG_06024	KH domain containing protein	ABC transporter	N	N	0.67
LOC_Os05g50990	MGG_06097	TTL3	Mitochondrial import receptor subunit tom-20	N	N	0.54
LOC_Os02g49560	MGG_06108	bZIP transcription factor domain containing protein	Vacuolar ATP synthase proteolipid subunit	N	N	0.54
LOC_Os09g10840	MGG_06108	transcription factor	Vacuolar ATP synthase proteolipid subunit	N	N	0.54
LOC_Os12g07140	MGG_06108	expressed protein	Vacuolar ATP synthase proteolipid subunit	Y	Y	0.57
LOC_Os05g03410	MGG_06118	expressed protein	Putative uncharacterized protein	N	N	0.55
LOC_Os10g22700	MGG_06118	AAA-type ATPase family protein	Putative uncharacterized protein	N	N	0.57
LOC_Os05g16490	MGG_06137	expressed protein	Dolichyl-phosphate beta-glucosyltransferase	N	N	0.52
LOC_Os01g38990	MGG_06141	mitochondrial carrier protein	Solute carrier family 25 member 38	Y	N	0.55
LOC_Os01g70800	MGG_06141	mitochondrial carrier protein	Solute carrier family 25 member 38	Y	N	0.53
LOC_Os03g15860	MGG_06141	mitochondrial carrier protein	Solute carrier family 25 member 38	Y	N	0.52
LOC_Os05g07900	MGG_06141	mitochondrial carrier protein	Solute carrier family 25 member 38	Y	N	0.57
LOC_Os05g23720	MGG_06141	mitochondrial carrier protein	Solute carrier family 25 member 38	Y	N	0.56
LOC_Os11g43960	MGG_06141	mitochondrial carrier protein	Solute carrier family 25 member 38	Y	N	0.55
LOC_Os01g41200	MGG_06143	heavy metal-associated domain containing protein	Lysophospholipase NTE1	N	N	0.53
LOC_Os01g42270	MGG_06143	transcriptional corepressor LEUNIG	Lysophospholipase NTE1	N	N	0.54
LOC_Os03g05720	MGG_06143	WD domain, G-beta repeat domain containing protein	Lysophospholipase NTE1	N	N	0.58
LOC_Os12g03540	MGG_06143	WD domain, G-beta repeat domain containing protein	Lysophospholipase NTE1	N	N	0.515
LOC_Os03g27080	MGG_06156	calmodulin-binding transcription activator 2	Putative uncharacterized protein	N	N	0.6
LOC_Os03g47620	MGG_06156	ankyrin	Putative uncharacterized protein	N	N	0.62
LOC_Os03g55110	MGG_06156	26S proteasome non-ATPase regulatory subunit 10	Putative uncharacterized protein	N	N	0.83
LOC_Os05g23320	MGG_06156	expressed protein	Putative uncharacterized protein	N	N	0.76
LOC_Os07g30774	MGG_06156	calmodulin-binding transcription activator 5	Putative uncharacterized protein	N	N	0.6
LOC_Os09g12350	MGG_06156	expressed protein	Putative uncharacterized protein	N	N	0.8
LOC_Os09g16550	MGG_06156	ankyrin repeat family protein	Putative uncharacterized protein	N	N	0.54
LOC_Os11g08050	MGG_06156	expressed protein	Putative uncharacterized protein	N	N	0.81
LOC_Os11g09270	MGG_06156	ankyrin repeat family protein	Putative uncharacterized protein	N	N	0.52
LOC_Os11g14260	MGG_06156	expressed protein	Putative uncharacterized protein	N	N	0.72
LOC_Os11g14630	MGG_06156	expressed protein	Putative uncharacterized protein	N	N	0.81
LOC_Os12g43940	MGG_06156	ankyrin repeat domain-containing protein	Putative uncharacterized protein	N	N	0.58
LOC_Os01g02720	MGG_06175	elongation factor Tu	Putative uncharacterized protein	N	N	0.51
LOC_Os02g53030	MGG_06175	mitogen-activated protein kinase kinase kinase 1	Putative uncharacterized protein	N	N	0.63
LOC_Os03g13614	MGG_06175	transcription factor	Putative uncharacterized protein	N	N	0.51
LOC_Os03g21800	MGG_06175	bZIP transcription factor family protein	Putative uncharacterized protein	N	N	0.56
LOC_Os03g51830	MGG_06175	heat shock protein DnaJ	Putative uncharacterized protein	N	N	0.545
LOC_Os04g58140	MGG_06175	elongation factor Tu	Putative uncharacterized protein	N	N	0.55
LOC_Os06g20610	MGG_06175	seven in absentia protein family domain containing protein	Putative uncharacterized protein	N	N	0.52
LOC_Os12g34840	MGG_06175	rhoGAP domain containing protein	Putative uncharacterized protein	N	N	0.51
LOC_Os04g53430	MGG_06183	MBTB8 - Bric-a-Brac, Tramtrack, Broad Complex BTB domain with Meprin and TRAF Homology MATH domain	Putative uncharacterized protein	N	N	0.57
LOC_Os07g01140	MGG_06183	MBTB12 - Bric-a-Brac, Tramtrack, Broad Complex BTB domain with Meprin and TRAF Homology MATH domain	Putative uncharacterized protein	N	N	0.52
LOC_Os07g46160	MGG_06183	MBTB14 - Bric-a-Brac, Tramtrack, Broad Complex BTB domain with Meprin and TRAF Homology MATH domain	Putative uncharacterized protein	N	N	0.52
LOC_Os08g13000	MGG_06183	MBTB20 - Bric-a-Brac, Tramtrack, Broad Complex BTB domain with Meprin and TRAF Homology MATH domain	Putative uncharacterized protein	N	N	0.52
LOC_Os08g13030	MGG_06183	MBTB21 - Bric-a-Brac, Tramtrack, Broad Complex BTB domain with Meprin and TRAF Homology MATH domain	Putative uncharacterized protein	N	N	0.52
LOC_Os08g13070	MGG_06183	MBTB23 - Bric-a-Brac, Tramtrack, Broad Complex BTB domain with Meprin and TRAF Homology MATH domain	Putative uncharacterized protein	N	N	0.52
LOC_Os10g28760	MGG_06183	MBTB33 - Bric-a-Brac, Tramtrack, Broad Complex BTB domain with Meprin and TRAF Homology MATH domain	Putative uncharacterized protein	N	N	0.51
LOC_Os10g29290	MGG_06183	MBTB50 - Bric-a-Brac, Tramtrack, Broad Complex BTB domain with Meprin and TRAF Homology MATH domain	Putative uncharacterized protein	N	N	0.53
LOC_Os10g29380	MGG_06183	MBTB52 - Bric-a-Brac, Tramtrack, Broad Complex BTB domain with Meprin and TRAF Homology MATH domain	Putative uncharacterized protein	N	N	0.55
LOC_Os10g29495	MGG_06183	speckle-type POZ protein	Putative uncharacterized protein	N	N	0.51
LOC_Os02g44570	MGG_06193	mitochondrial carrier protein	Solute carrier family 25 member 33	Y	N	0.57
LOC_Os09g33470	MGG_06193	mitochondrial carrier protein	Solute carrier family 25 member 33	Y	N	0.57
LOC_Os10g40950	MGG_06203	polyol transporter 5	High-affinity glucose transporter RGT2	Y	N	0.56
LOC_Os01g59930	MGG_06289	NADH-cytochrome b5 reductase	NADH-cytochrome b5 reductase 1	Y	N	0.565
LOC_Os05g40990	MGG_06289	NADH-cytochrome b5 reductase	NADH-cytochrome b5 reductase 1	Y	N	0.525
LOC_Os08g09350	MGG_06289	gar2	NADH-cytochrome b5 reductase 1	N	N	0.55
LOC_Os01g42430	MGG_06326	vacuolar ATP synthase	Vacuolar ATP synthase proteolipid subunit	Y	Y	0.6
LOC_Os01g73130	MGG_06326	vacuolar ATP synthase	Vacuolar ATP synthase proteolipid subunit	Y	Y	0.52
LOC_Os02g49560	MGG_06326	bZIP transcription factor domain containing protein	Vacuolar ATP synthase proteolipid subunit	N	N	0.52
LOC_Os12g07140	MGG_06326	expressed protein	Vacuolar ATP synthase proteolipid subunit	Y	Y	0.51
LOC_Os01g12520	MGG_06332	mitochondrial carrier protein	Peroxisomal adenine nucleotide transporter 1	Y	N	0.55
LOC_Os01g38990	MGG_06332	mitochondrial carrier protein	Peroxisomal adenine nucleotide transporter 1	Y	N	0.56
LOC_Os01g70800	MGG_06332	mitochondrial carrier protein	Peroxisomal adenine nucleotide transporter 1	Y	N	0.56
LOC_Os01g73420	MGG_06332	mitochondrial carrier protein	Peroxisomal adenine nucleotide transporter 1	Y	N	0.56
LOC_Os03g09110	MGG_06332	mitochondrial carrier protein	Peroxisomal adenine nucleotide transporter 1	Y	N	0.58
LOC_Os03g15690	MGG_06332	phosphate carrier protein, mitochondrial precursor	Peroxisomal adenine nucleotide transporter 1	Y	N	0.58
LOC_Os03g15860	MGG_06332	mitochondrial carrier protein	Peroxisomal adenine nucleotide transporter 1	Y	N	0.58
LOC_Os03g54760	MGG_06332	mitochondrial carrier protein	Peroxisomal adenine nucleotide transporter 1	Y	N	0.63
LOC_Os04g37600	MGG_06332	phosphate carrier protein, mitochondrial precursor	Peroxisomal adenine nucleotide transporter 1	Y	N	0.57
LOC_Os05g07900	MGG_06332	mitochondrial carrier protein	Peroxisomal adenine nucleotide transporter 1	Y	N	0.58
LOC_Os05g23720	MGG_06332	mitochondrial carrier protein	Peroxisomal adenine nucleotide transporter 1	Y	N	0.58
LOC_Os05g50840	MGG_06332	mitochondrial carrier protein	Peroxisomal adenine nucleotide transporter 1	Y	N	0.6
LOC_Os06g23870	MGG_06332	acyl-CoA dehydrogenase domain protein	Peroxisomal adenine nucleotide transporter 1	N	N	0.68
LOC_Os06g40050	MGG_06332	mitochondrial carrier protein	Peroxisomal adenine nucleotide transporter 1	Y	N	0.56
LOC_Os08g29720	MGG_06332	mitochondrial carrier protein	Peroxisomal adenine nucleotide transporter 1	Y	N	0.59
LOC_Os08g40850	MGG_06332	mitochondrial carrier protein	Peroxisomal adenine nucleotide transporter 1	Y	N	0.55
LOC_Os09g38100	MGG_06332	phosphate carrier protein, mitochondrial precursor	Peroxisomal adenine nucleotide transporter 1	Y	N	0.58
LOC_Os10g25830	MGG_06332	mitochondrial carrier protein	Peroxisomal adenine nucleotide transporter 1	Y	N	0.59
LOC_Os10g42299	MGG_06332	mitochondrial carrier protein	Peroxisomal adenine nucleotide transporter 1	Y	N	0.59
LOC_Os11g43960	MGG_06332	mitochondrial carrier protein	Peroxisomal adenine nucleotide transporter 1	Y	N	0.57
LOC_Os05g33240	MGG_06341	DNA-directed RNA polymerase II subunit RPB7	Putative uncharacterized protein	N	N	0.53
LOC_Os05g45920	MGG_06341	S1 RNA binding domain containing protein	Putative uncharacterized protein	N	N	0.55
LOC_Os12g12514	MGG_06341	NADP-dependent oxidoreductase	Putative uncharacterized protein	N	N	0.53
LOC_Os01g12520	MGG_06405	mitochondrial carrier protein	Mitochondrial oxaloacetate transporter	Y	N	0.68
LOC_Os02g24134	MGG_06521	Sec1 family transport protein	V-SNARE	N	N	0.57
LOC_Os01g09370	MGG_06614	ankyrin repeat domain-containing protein 28	Putative uncharacterized protein	N	N	0.53
LOC_Os08g23590	MGG_06614	ankyrin repeat domain containing protein	Putative uncharacterized protein	N	N	0.53
LOC_Os11g08050	MGG_06614	expressed protein	Putative uncharacterized protein	N	N	0.62
LOC_Os11g14520	MGG_06614	expressed protein	Putative uncharacterized protein	N	N	0.58
LOC_Os12g12810	MGG_06614	ankyrin repeat family protein	Putative uncharacterized protein	N	N	0.66
LOC_Os02g18820	MGG_06631	WD domain, G-beta repeat domain containing protein	Putative uncharacterized protein	N	N	0.558333
LOC_Os03g19340	MGG_06631	WD domain, G-beta repeat domain containing protein	Putative uncharacterized protein	N	N	0.55
LOC_Os09g06560	MGG_06631	WD domain, G-beta repeat domain containing protein	Putative uncharacterized protein	N	N	0.62
LOC_Os08g08760	MGG_06660	ubiquitin family protein	3-oxoacyl-[acyl-carrier protein] reductase	N	N	0.591667
LOC_Os11g36060	MGG_06660	THUMP domain-containing protein	3-oxoacyl-[acyl-carrier protein] reductase	N	N	0.54
LOC_Os01g34970	MGG_06707	MDR-like ABC transporter	ATP-binding cassette protein	Y	N	0.59
LOC_Os02g13130	MGG_06707	KH domain-containing protein	ATP-binding cassette protein	N	N	0.67
LOC_Os08g15080	MGG_06707	proline rich protein 3	ATP-binding cassette protein	N	N	0.76
LOC_Os01g22520	MGG_06786	dihydrolipoyl dehydrogenase 1, mitochondrial precursor	Disulfide-isomerase A6 precurso	N	N	0.57
LOC_Os01g59760	MGG_06786	bZIP transcription factor	Disulfide-isomerase A6 precurso	N	N	0.53
LOC_Os02g57530	MGG_06786	ethylene receptor	Disulfide-isomerase A6 precurso	N	N	0.51
LOC_Os02g58670	MGG_06786	bZIP transcription factor domain containing protein	Disulfide-isomerase A6 precurso	N	N	0.655
LOC_Os04g54474	MGG_06786	transcription factor	Disulfide-isomerase A6 precurso	N	N	0.517833
LOC_Os05g48930	MGG_06786	OsGrx_S2 - glutaredoxin subgroup III	Disulfide-isomerase A6 precurso	N	N	0.63
LOC_Os06g12190	MGG_06786	glutaredoxin	Disulfide-isomerase A6 precurso	N	N	0.57
LOC_Os06g50600	MGG_06786	bZIP transcription factor domain containing protein	Disulfide-isomerase A6 precurso	N	N	0.6
LOC_Os06g50830	MGG_06786	bZIP transcription factor domain containing protein	Disulfide-isomerase A6 precurso	N	N	0.6
LOC_Os07g48660	MGG_06786	bZIP transcription factor domain containing protein	Disulfide-isomerase A6 precurso	N	N	0.56
LOC_Os10g40950	MGG_06828	polyol transporter 5	Putative uncharacterized protein	N	N	0.593333
LOC_Os01g07430	MGG_06871	myb-like DNA-binding domain containing protein	Putative uncharacterized protein	N	N	0.59
LOC_Os01g50160	MGG_06878	MDR-like ABC transporter	ATP-dependent permease MDL2	Y	N	0.54
LOC_Os02g11760	MGG_06878	pleiotropic drug resistance protein	ATP-dependent permease MDL2	Y	N	0.57
LOC_Os03g04920	MGG_06878	multidrug resistance-associated protein	ATP-dependent permease MDL2	Y	N	0.51
LOC_Os03g64200	MGG_06878	ABC-2 type transporter	ATP-dependent permease MDL2	Y	N	0.53
LOC_Os05g47490	MGG_06878	MDR-like ABC transporter	ATP-dependent permease MDL2	Y	N	0.52
LOC_Os07g20170	MGG_06878	actin-depolymerizing factor	ATP-dependent permease MDL2	N	N	0.64
LOC_Os09g16290	MGG_06878	ABC-2 type transporter	ATP-dependent permease MDL2	Y	N	0.58
LOC_Os09g16380	MGG_06878	pleiotropic drug resistance protein	ATP-dependent permease MDL2	Y	N	0.6
LOC_Os11g22350	MGG_06878	white-brown complex homolog protein	ATP-dependent permease MDL2	Y	N	0.51
LOC_Os02g24134	MGG_06883	Sec1 family transport protein	t-SNARE	N	N	0.65
LOC_Os06g16430	MGG_07025	FHA domain containing protein	Putative uncharacterized protein	Y	N	0.52
LOC_Os07g04190	MGG_07025	receptor protein kinase CLAVATA1 precursor	Putative uncharacterized protein	N	N	0.55
LOC_Os01g04814	MGG_07075	vacuolar protein sorting-associating protein 4B	ATPase family AAA domain-containing protein 1	Y	N	0.51
LOC_Os01g45400	MGG_07075	ubiquitin family protein	ATPase family AAA domain-containing protein 1	Y	N	0.83
LOC_Os01g74610	MGG_07075	zinc finger, C3HC4 type domain containing protein	ATPase family AAA domain-containing protein 1	N	N	0.53
LOC_Os02g08360	MGG_07075	RNA recognition motif	ATPase family AAA domain-containing protein 1	N	N	0.59
LOC_Os02g10640	MGG_07075	26S protease regulatory subunit	ATPase family AAA domain-containing protein 1	Y	N	0.52
LOC_Os02g11050	MGG_07075	26S protease regulatory subunit	ATPase family AAA domain-containing protein 1	Y	N	0.56
LOC_Os02g21970	MGG_07075	26S protease regulatory subunit 6B	ATPase family AAA domain-containing protein 1	Y	N	0.57
LOC_Os02g47660	MGG_07075	basic helix-loop-helix	ATPase family AAA domain-containing protein 1	N	N	0.581667
LOC_Os03g18690	MGG_07075	26S protease regulatory subunit 4	ATPase family AAA domain-containing protein 1	Y	N	0.55
LOC_Os03g32100	MGG_07075	spotted leaf 11	ATPase family AAA domain-containing protein 1	N	N	0.59
LOC_Os03g58570	MGG_07075	WD domain, G-beta repeat domain containing protein	ATPase family AAA domain-containing protein 1	N	N	0.74
LOC_Os04g57720	MGG_07075	OsRR6 type-A response regulator	ATPase family AAA domain-containing protein 1	N	N	0.6
LOC_Os05g27530	MGG_07075	ras-related protein	ATPase family AAA domain-containing protein 1	N	N	0.53
LOC_Os05g46210	MGG_07075	OsPOP10 - Putative Prolyl Oligopeptidase homologue	ATPase family AAA domain-containing protein 1	N	N	0.54
LOC_Os06g39870	MGG_07075	26S protease regulatory subunit 8	ATPase family AAA domain-containing protein 1	Y	N	0.52
LOC_Os06g40560	MGG_07075	26S protease regulatory subunit S10B	ATPase family AAA domain-containing protein 1	Y	N	0.56
LOC_Os06g44080	MGG_07075	ubiquitin family protein	ATPase family AAA domain-containing protein 1	Y	N	0.78
LOC_Os07g33850	MGG_07075	ras-related protein	ATPase family AAA domain-containing protein 1	N	N	0.55
LOC_Os07g49150	MGG_07075	26S protease regulatory subunit 4	ATPase family AAA domain-containing protein 1	Y	N	0.59
LOC_Os08g37290	MGG_07075	basic helix-loop-helix	ATPase family AAA domain-containing protein 1	N	N	0.56
LOC_Os09g25320	MGG_07075	ubiquitin family protein	ATPase family AAA domain-containing protein 1	Y	N	0.78
LOC_Os09g28900	MGG_07075	basic helix-loop-helix	ATPase family AAA domain-containing protein 1	N	N	0.58
LOC_Os10g01530	MGG_07075	helix-loop-helix DNA-binding domain containing protein	ATPase family AAA domain-containing protein 1	N	N	0.615
LOC_Os10g05730	MGG_07075	armadillo/beta-catenin repeat family protein	ATPase family AAA domain-containing protein 1	N	N	0.57
LOC_Os10g35810	MGG_07075	thylakoid lumenal protein	ATPase family AAA domain-containing protein 1	N	N	0.55
LOC_Os10g41260	MGG_07075	MYB family transcription factor	ATPase family AAA domain-containing protein 1	N	N	0.54
LOC_Os12g39850	MGG_07075	helix-loop-helix DNA-binding domain containing protein	ATPase family AAA domain-containing protein 1	N	N	0.618333
LOC_Os01g07880	MGG_07110	transcription factor HY5	Phosphatidylethanolamine N-methyltransferase	N	N	0.63
LOC_Os01g64730	MGG_07110	bZIP transcription factor domain containing protein	Phosphatidylethanolamine N-methyltransferase	N	N	0.52
LOC_Os06g39960	MGG_07110	bZIP transcription factor domain containing protein	Phosphatidylethanolamine N-methyltransferase	N	N	0.55
LOC_Os04g33630	MGG_07117	2Fe-2S iron-sulfur cluster binding domain containing protein	NADPH-cytochrome P450 reductase; NADPH-cytochrome P450 reductase, variant	Y	N	0.54
LOC_Os06g21930	MGG_07157	inorganic phosphate transporter	MFS sugar transporter	Y	N	0.66
LOC_Os02g55400	MGG_07200	ATPase 8, plasma membrane-type	Plasma membrane ATPase	Y	N	0.73
LOC_Os03g01120	MGG_07200	E1-E2 ATPase domain containing protein	Plasma membrane ATPase	Y	N	0.55
LOC_Os05g25550	MGG_07200	E1-E2 ATPase domain containing protein	Plasma membrane ATPase	Y	N	0.56
LOC_Os11g29490	MGG_07200	plasma membrane ATPase	Plasma membrane ATPase	Y	N	0.65
LOC_Os11g29750	MGG_07200	plasma membrane ATPase	Plasma membrane ATPase	Y	N	0.68
LOC_Os01g68710	MGG_07234	peptidyl-prolyl cis-trans isomerase, FKBP-type	FK506-binding protein 2	Y	Y	0.78
LOC_Os07g48410	MGG_07234	RNA-binding zinc finger protein	FK506-binding protein 2	N	N	0.54
LOC_Os08g31450	MGG_07234	MBTB28 - Bric-a-Brac, Tramtrack, Broad Complex BTB domain with Meprin and TRAF Homology MATH domain	FK506-binding protein 2	N	N	0.52
LOC_Os08g45240	MGG_07234	RNA recognition motif containing protein	FK506-binding protein 2	N	N	0.53
LOC_Os09g30490	MGG_07234	EF hand family protein	FK506-binding protein 2	N	N	0.52
LOC_Os09g32526	MGG_07234	peptidyl-prolyl cis-trans isomerase, FKBP-type	FK506-binding protein 2	Y	Y	0.65
LOC_Os10g25010	MGG_07234	OsCML8 - Calmodulin-related calcium sensor protein	FK506-binding protein 2	N	N	0.64
LOC_Os10g12080	MGG_07247	cytochrome P450	Cytochrome P450	Y	N	0.53
LOC_Os01g54050	MGG_07312	histidine-containing phosphotransfer protein	Osmosensing histidine protein kinase SLN1	N	N	0.54
LOC_Os03g18720	MGG_07312	RNA recognition motif containing protein	Osmosensing histidine protein kinase SLN1	N	N	0.54
LOC_Os03g45330	MGG_07312	hsp20/alpha crystallin family protein	Osmosensing histidine protein kinase SLN1	N	N	0.533333
LOC_Os03g57330	MGG_07312	IQ calmodulin-binding motif domain containing protein	Osmosensing histidine protein kinase SLN1	N	N	0.51
LOC_Os04g28120	MGG_07312	response regulator receiver domain containing protein	Osmosensing histidine protein kinase SLN1	Y	N	0.55
LOC_Os04g28160	MGG_07312	response regulator receiver domain containing protein	Osmosensing histidine protein kinase SLN1	Y	N	0.55
LOC_Os04g30470	MGG_07312	U-box domain-containing protein	Osmosensing histidine protein kinase SLN1	N	N	0.58
LOC_Os05g09410	MGG_07312	histidine-containing phosphotransfer protein 4	Osmosensing histidine protein kinase SLN1	N	N	0.59
LOC_Os07g48960	MGG_07312	OsLonP3 - Putative Lon protease homologue	Osmosensing histidine protein kinase SLN1	N	N	0.506667
LOC_Os09g34070	MGG_07312	RNA recognition motif containing protein	Osmosensing histidine protein kinase SLN1	N	N	0.56
LOC_Os12g04500	MGG_07312	response regulator receiver domain containing protein	Osmosensing histidine protein kinase SLN1	Y	N	0.51
LOC_Os02g56880	MGG_07358	transcriptional corepressor LEUNIG	Serin endopeptidase	N	N	0.58
LOC_Os03g03150	MGG_07358	WD repeat-containing protein	Serin endopeptidase	N	N	0.54
LOC_Os06g50880	MGG_07358	WD domain, G-beta repeat domain containing protein	Serin endopeptidase	N	N	0.51
LOC_Os02g21750	MGG_07375	MDR-like ABC transporter	ABC transporter CDR4	Y	N	0.56
LOC_Os05g50360	MGG_07375	anaphase-promoting complex subunit 10	ABC transporter CDR4	N	N	0.55
LOC_Os09g03630	MGG_07375	ankyrin	ABC transporter CDR4	N	N	0.51
LOC_Os11g05700	MGG_07375	ABC transporter family protein	ABC transporter CDR4	Y	N	0.55
LOC_Os11g08050	MGG_07375	expressed protein	ABC transporter CDR4	N	N	0.56
LOC_Os02g24614	MGG_07382	DNA-directed RNA polymerase subunit beta	Palmitoyltransferase AKR1	N	N	0.51
LOC_Os03g03550	MGG_07382	bZIP family transcription factor	Palmitoyltransferase AKR1	N	N	0.57
LOC_Os03g27030	MGG_07382	RNA recognition motif containing protein	Palmitoyltransferase AKR1	N	N	0.82
LOC_Os04g59394	MGG_07382	expressed protein	Palmitoyltransferase AKR1	N	N	0.66
LOC_Os05g43576	MGG_07382	radical SAM enzyme	Palmitoyltransferase AKR1	N	N	0.63
LOC_Os06g03830	MGG_07382	retinol dehydrogenase	Palmitoyltransferase AKR1	N	N	0.64
LOC_Os07g31210	MGG_07382	OsWAK70 - OsWAK receptor-like cytoplasmic kinase OsWAK-RLCK	Palmitoyltransferase AKR1	N	N	0.58
LOC_Os07g40630	MGG_07382	BRASSINOSTEROID INSENSITIVE 1 precursor	Palmitoyltransferase AKR1	N	N	0.53
LOC_Os08g18920	MGG_07382	protein kinase domain containing protein	Palmitoyltransferase AKR1	N	N	0.56
LOC_Os10g42790	MGG_07382	cytidylyltransferase domain containing protein	Palmitoyltransferase AKR1	N	N	0.56
LOC_Os11g41820	MGG_07382	RNA recognition motif containing protein	Palmitoyltransferase AKR1	N	N	0.64
LOC_Os11g44260	MGG_07382	expressed protein	Palmitoyltransferase AKR1	N	N	0.65
LOC_Os01g09252	MGG_07404	WD domain, G-beta repeat domain containing protein	Tripeptidyl-peptidase 1	N	N	0.57
LOC_Os01g42270	MGG_07404	transcriptional corepressor LEUNIG	Tripeptidyl-peptidase 1	N	N	0.6
LOC_Os02g03180	MGG_07404	inhibitor I family protein	Tripeptidyl-peptidase 1	Y	N	0.51
LOC_Os02g32430	MGG_07404	WD domain, G-beta repeat domain containing protein	Tripeptidyl-peptidase 1	N	N	0.57
LOC_Os03g05720	MGG_07404	WD domain, G-beta repeat domain containing protein	Tripeptidyl-peptidase 1	N	N	0.6
LOC_Os10g38080	MGG_07404	OsSub61 - Putative Subtilisin homologue	Tripeptidyl-peptidase 1	Y	N	0.54
LOC_Os06g21920	MGG_07428	inorganic phosphate transporter 1-9	Allantoate permease	N	N	0.51
LOC_Os11g03890	MGG_07444	RNA recognition motif containing protein	Multidrug resistance protein fnx1	N	N	0.51
LOC_Os03g64110	MGG_07471	WD domain, G-beta repeat domain containing protein	Putative uncharacterized protein	N	N	0.55
LOC_Os06g07540	MGG_07471	WD-40 repeat family protein	Putative uncharacterized protein	N	N	0.7075
LOC_Os06g46475	MGG_07471	WD domain, G-beta repeat domain containing protein	Putative uncharacterized protein	N	N	0.52
LOC_Os01g03914	MGG_07494	cation efflux family protein	Cation diffusion facilitator 1	Y	N	0.61
LOC_Os01g62070	MGG_07494	cation efflux family protein	Cation diffusion facilitator 1	Y	N	0.59
LOC_Os02g53490	MGG_07494	cation efflux family protein	Cation diffusion facilitator 1	Y	N	0.56
LOC_Os03g12530	MGG_07494	cation efflux family protein	Cation diffusion facilitator 1	Y	N	0.59
LOC_Os03g22550	MGG_07494	cation efflux family protein	Cation diffusion facilitator 1	Y	N	0.7
LOC_Os01g09590	MGG_07502	myb-like DNA-binding domain containing protein	Chaperone dnaJ 2	N	N	0.68
LOC_Os01g13760	MGG_07502	dnaJ domain containing protein	Chaperone dnaJ 2	Y	N	0.62
LOC_Os01g16810	MGG_07502	MYB family transcription factor	Chaperone dnaJ 2	N	N	0.62
LOC_Os01g19330	MGG_07502	MYB family transcription factor	Chaperone dnaJ 2	N	N	0.67
LOC_Os01g19970	MGG_07502	MYB family transcription factor	Chaperone dnaJ 2	N	N	0.53
LOC_Os01g36460	MGG_07502	MYB family transcription factor	Chaperone dnaJ 2	N	N	0.65
LOC_Os01g49160	MGG_07502	MYB family transcription factor	Chaperone dnaJ 2	N	N	0.67
LOC_Os01g50720	MGG_07502	MYB family transcription factor	Chaperone dnaJ 2	N	N	0.63
LOC_Os02g30700	MGG_07502	MYB family transcription factor	Chaperone dnaJ 2	N	N	0.53
LOC_Os02g41510	MGG_07502	MYB family transcription factor	Chaperone dnaJ 2	N	N	0.6
LOC_Os02g49986	MGG_07502	MYB family transcription factor	Chaperone dnaJ 2	N	N	0.73
LOC_Os02g54520	MGG_07502	MYB family transcription factor	Chaperone dnaJ 2	N	N	0.7
LOC_Os03g24610	MGG_07502	endonuclease/exonuclease/phosphatase family domain containing protein	Chaperone dnaJ 2	N	N	0.52
LOC_Os03g26130	MGG_07502	MYB family transcription factor	Chaperone dnaJ 2	N	N	0.61
LOC_Os03g38210	MGG_07502	MYB family transcription factor	Chaperone dnaJ 2	N	N	0.61
LOC_Os03g56090	MGG_07502	MYB family transcription factor	Chaperone dnaJ 2	N	N	0.52
LOC_Os04g45060	MGG_07502	MYB family transcription factor	Chaperone dnaJ 2	N	N	0.71
LOC_Os05g41166	MGG_07502	MYB family transcription factor	Chaperone dnaJ 2	N	N	0.65
LOC_Os06g07650	MGG_07502	myb-like DNA-binding domain, SHAQKYF class family protein	Chaperone dnaJ 2	N	N	0.595
LOC_Os06g14710	MGG_07502	myb-like DNA-binding domain containing protein	Chaperone dnaJ 2	N	N	0.56
LOC_Os07g14110	MGG_07502	MYB family transcription factor	Chaperone dnaJ 2	N	N	0.56
LOC_Os08g15020	MGG_07502	MYB family transcription factor	Chaperone dnaJ 2	N	N	0.73
LOC_Os08g33660	MGG_07502	MYB family transcription factor	Chaperone dnaJ 2	N	N	0.54
LOC_Os08g33940	MGG_07502	MYB family transcription factor	Chaperone dnaJ 2	N	N	0.56
LOC_Os08g34960	MGG_07502	MYB family transcription factor	Chaperone dnaJ 2	N	N	0.63
LOC_Os08g35160	MGG_07502	heat shock protein DnaJ	Chaperone dnaJ 2	Y	N	0.65
LOC_Os09g23620	MGG_07502	MYB family transcription factor	Chaperone dnaJ 2	N	N	0.62
LOC_Os09g36250	MGG_07502	MYB family transcription factor	Chaperone dnaJ 2	N	N	0.64
LOC_Os11g35390	MGG_07502	MYB family transcription factor	Chaperone dnaJ 2	N	N	0.54
LOC_Os12g07640	MGG_07502	MYB family transcription factor	Chaperone dnaJ 2	N	N	0.78
LOC_Os12g37690	MGG_07502	MYB family transcription factor	Chaperone dnaJ 2	N	N	0.56
LOC_Os06g43440	MGG_07550	cytochrome P450	Isotrichodermin C-15 hydroxylase	Y	N	0.7
LOC_Os10g37034	MGG_07550	cytochrome P450	Isotrichodermin C-15 hydroxylase	Y	N	0.58
LOC_Os01g31810	MGG_07567	RNA recognition motif containing protein	Multidrug resistance-associated protein 6	N	N	0.52
LOC_Os12g37580	MGG_07567	ABC transporter, ATP-binding protein	Multidrug resistance-associated protein 6	Y	N	0.52
LOC_Os02g14910	MGG_07602	bZIP transcription factor family protein	Tyrosine phosphatase	N	N	0.6
LOC_Os06g10880	MGG_07602	bZIP transcription factor	Tyrosine phosphatase	N	N	0.51
LOC_Os06g45140	MGG_07602	bZIP transcription factor domain containing protein	Tyrosine phosphatase	N	N	0.56
LOC_Os07g03220	MGG_07676	bZIP transcription factor domain containing protein	Putative uncharacterized protein	N	N	0.66
LOC_Os01g45090	MGG_07716	MYB family transcription factor	DnaJ domain-containing protein	N	N	0.52
LOC_Os01g74410	MGG_07716	MYB family transcription factor	DnaJ domain-containing protein	N	N	0.51
LOC_Os02g36890	MGG_07716	MYB family transcription factor	DnaJ domain-containing protein	N	N	0.51
LOC_Os03g12350	MGG_07716	two-component response regulator	DnaJ domain-containing protein	N	N	0.52
LOC_Os03g13310	MGG_07716	MYB family transcription factor	DnaJ domain-containing protein	N	N	0.55
LOC_Os03g20090	MGG_07716	MYB family transcription factor	DnaJ domain-containing protein	N	N	0.56
LOC_Os03g52794	MGG_07716	phosphatidylinositol kinase	DnaJ domain-containing protein	N	N	0.59
LOC_Os03g56090	MGG_07716	MYB family transcription factor	DnaJ domain-containing protein	N	N	0.51
LOC_Os03g62230	MGG_07716	ZOS3-24 - C2H2 zinc finger protein	DnaJ domain-containing protein	N	N	0.69
LOC_Os05g03630	MGG_07716	dnaJ domain containing protein	DnaJ domain-containing protein	Y	N	0.56
LOC_Os05g04210	MGG_07716	MYB family transcription factor	DnaJ domain-containing protein	N	N	0.52
LOC_Os05g46610	MGG_07716	myb-like DNA-binding domain containing protein	DnaJ domain-containing protein	N	N	0.55
LOC_Os06g11780	MGG_07716	MYB family transcription factor	DnaJ domain-containing protein	N	N	0.55
LOC_Os07g25370	MGG_07716	myb-like DNA-binding domain containing protein	DnaJ domain-containing protein	N	N	0.53
LOC_Os07g43580	MGG_07716	MYB family transcription factor	DnaJ domain-containing protein	N	N	0.54
LOC_Os08g33660	MGG_07716	MYB family transcription factor	DnaJ domain-containing protein	N	N	0.51
LOC_Os08g37970	MGG_07716	MYB family transcription factor	DnaJ domain-containing protein	N	N	0.55
LOC_Os09g12750	MGG_07716	Myb-like DNA-binding domain containing protein	DnaJ domain-containing protein	N	N	0.56
LOC_Os11g35390	MGG_07716	MYB family transcription factor	DnaJ domain-containing protein	N	N	0.51
LOC_Os09g16458	MGG_07736	pleiotropic drug resistance protein 4	Putative uncharacterized protein	N	N	0.57
LOC_Os01g49430	MGG_07789	DnaK family protein	3-phytase	N	N	0.92
LOC_Os01g62290	MGG_07789	DnaK family protein	3-phytase	N	N	0.75
LOC_Os02g02410	MGG_07789	DnaK family protein	3-phytase	N	N	0.98
LOC_Os02g25960	MGG_07789	ankyrin repeat family protein	3-phytase	N	N	0.65
LOC_Os02g48110	MGG_07789	DnaK family protein	3-phytase	N	N	0.68
LOC_Os02g54860	MGG_07789	ankyrin repeat-rich protein	3-phytase	N	N	0.62
LOC_Os03g11910	MGG_07789	DnaK family protein	3-phytase	N	N	0.91
LOC_Os03g16860	MGG_07789	DnaK family protein	3-phytase	N	N	0.74
LOC_Os03g16880	MGG_07789	DnaK family protein	3-phytase	N	N	0.8
LOC_Os03g16920	MGG_07789	DnaK family protein	3-phytase	N	N	0.79
LOC_Os03g50250	MGG_07789	DnaK family protein	3-phytase	N	N	0.98
LOC_Os03g60620	MGG_07789	DnaK family protein	3-phytase	N	N	0.75
LOC_Os05g30480	MGG_07789	DnaK family protein	3-phytase	N	N	0.96
LOC_Os05g35400	MGG_07789	DnaK family protein	3-phytase	N	N	0.97
LOC_Os05g38530	MGG_07789	DnaK family protein	3-phytase	N	N	0.75
LOC_Os06g13050	MGG_07789	peroxidase family protein	3-phytase	N	N	0.51
LOC_Os07g30774	MGG_07789	calmodulin-binding transcription activator 5	3-phytase	N	N	0.55
LOC_Os07g43030	MGG_07789	calmodulin-binding transcription activator	3-phytase	N	N	0.64
LOC_Os08g09770	MGG_07789	DnaK family protein	3-phytase	N	N	0.95
LOC_Os09g03630	MGG_07789	ankyrin	3-phytase	N	N	0.51
LOC_Os11g08440	MGG_07789	DnaK family protein	3-phytase	N	N	0.79
LOC_Os11g08445	MGG_07789	DnaK family protein	3-phytase	N	N	0.76
LOC_Os11g08460	MGG_07789	DnaK family protein	3-phytase	N	N	0.81
LOC_Os11g08470	MGG_07789	DnaK family protein	3-phytase	N	N	0.555
LOC_Os11g47760	MGG_07789	DnaK family protein	3-phytase	N	N	0.79
LOC_Os12g40770	MGG_07789	ankyrin-1	3-phytase	N	N	0.53
LOC_Os09g36910	MGG_07802	bZIP transcription factor domain containing protein	Putative uncharacterized protein	N	N	0.52
LOC_Os06g21920	MGG_07808	inorganic phosphate transporter 1-9	Membrane transporter	N	N	0.57
LOC_Os03g03680	MGG_07843	transporter family protein	Putative uncharacterized protein	N	N	0.55
LOC_Os01g60660	MGG_07848	methionyl-tRNA synthetase	Multidrug resistance protein CDR1	N	N	0.68
LOC_Os02g09450	MGG_07848	glycerophosphoryl diester phosphodiesterase family protein	Multidrug resistance protein CDR1	N	N	0.58
LOC_Os02g51890	MGG_07848	RNA recognition motif containing protein	Multidrug resistance protein CDR1	N	N	0.54
LOC_Os03g03900	MGG_07848	NIN	Multidrug resistance protein CDR1	N	N	0.54
LOC_Os03g15890	MGG_07848	RNA recognition motif containing protein	Multidrug resistance protein CDR1	N	N	0.56
LOC_Os03g17760	MGG_07848	RNA recognition motif containing protein	Multidrug resistance protein CDR1	N	N	0.51
LOC_Os05g10740	MGG_07848	pollen-specific protein SF21	Multidrug resistance protein CDR1	N	N	0.52
LOC_Os06g36740	MGG_07848	pollen-specific protein SF21	Multidrug resistance protein CDR1	N	N	0.51
LOC_Os10g37630	MGG_07848	UBX domain-containing protein	Multidrug resistance protein CDR1	N	N	0.535
LOC_Os11g07490	MGG_07848	RNA recognition motif containing protein	Multidrug resistance protein CDR1	N	N	0.74
LOC_Os03g07530	MGG_07861	OsFBK12 - F-box domain and kelch repeat containing protein	Carboxypeptidase S1	N	N	0.52
LOC_Os06g08690	MGG_07877	leucine-rich repeat receptor protein kinase EXS precursor	Dipeptidyl-peptidase V	N	N	0.6
LOC_Os11g35840	MGG_07877	expressed protein	Dipeptidyl-peptidase V	N	N	0.53
LOC_Os02g10140	MGG_07927	bZIP transcription factor domain containing protein	Endochitinase 1	N	N	0.54
LOC_Os04g01600	MGG_07927	erythronate-4-phosphate dehydrogenase domain containing protein	Endochitinase 1	N	N	0.7
LOC_Os04g01650	MGG_07927	erythronate-4-phosphate dehydrogenase domain containing protein	Endochitinase 1	N	N	0.71
LOC_Os04g01660	MGG_07927	erythronate-4-phosphate dehydrogenase domain containing protein	Endochitinase 1	N	N	0.53
LOC_Os04g01674	MGG_07927	erythronate-4-phosphate dehydrogenase domain containing protein	Endochitinase 1	N	N	0.59
LOC_Os05g41070	MGG_07927	bZIP transcription factor	Endochitinase 1	N	N	0.58
LOC_Os06g29180	MGG_07927	erythronate-4-phosphate dehydrogenase domain containing protein	Endochitinase 1	N	N	0.64
LOC_Os06g29220	MGG_07927	erythronate-4-phosphate dehydrogenase domain containing protein	Endochitinase 1	N	N	0.7
LOC_Os06g50480	MGG_07927	bZIP transcription factor domain containing protein	Endochitinase 1	N	N	0.65
LOC_Os07g03240	MGG_07927	RNA recognition motif containing protein	Endochitinase 1	N	N	0.53
LOC_Os05g15770	MGG_07955	glycosyl hydrolase	Endo-1,4-beta-xylanase 22	Y	N	0.503333
LOC_Os08g40690	MGG_07955	glycosyl hydrolase	Endo-1,4-beta-xylanase 22	Y	N	0.513333
LOC_Os11g47520	MGG_07955	glycosyl hydrolase	Endo-1,4-beta-xylanase 22	Y	N	0.513333
LOC_Os01g71780	MGG_07965	WD domain, G-beta repeat domain containing protein	Alkaline proteinase	N	N	0.51
LOC_Os02g11060	MGG_07965	WD domain, G-beta repeat domain containing protein	Alkaline proteinase	N	N	0.58
LOC_Os05g25630	MGG_07965	inhibitor I family protein	Alkaline proteinase	Y	N	0.58
LOC_Os12g36210	MGG_07965	inhibitor I family protein	Alkaline proteinase	Y	N	0.56
LOC_Os12g36240	MGG_07965	inhibitor I family protein	Alkaline proteinase	Y	N	0.56
LOC_Os12g41260	MGG_07965	protein kinase domain containing protein	Alkaline proteinase	N	N	0.51
LOC_Os11g28610	MGG_07968	transporter family protein	High-affinity nicotinic acid transporter	N	N	0.53
LOC_Os05g02940	MGG_07971	calcium-transporting ATPase 2, endoplasmic reticulum-type	Calcium-transporting ATPase 1	Y	N	0.535
LOC_Os01g49510	MGG_08047	OsPOP3 - Putative Prolyl Oligopeptidase homologue	Glycerophosphoryl diester phosphodiesterase	N	N	0.57
LOC_Os11g47150	MGG_08047	OsWAK122 - OsWAK receptor-like protein kinase	Glycerophosphoryl diester phosphodiesterase	N	N	0.58
LOC_Os12g19290	MGG_08047	AGC_AGC_other_NDRh_TRCd.4 - ACG kinases include homologs to PKA, PKG and PKC	Glycerophosphoryl diester phosphodiesterase	N	N	0.53
LOC_Os04g01600	MGG_08054	erythronate-4-phosphate dehydrogenase domain containing protein	Chitinase 1	N	N	0.59
LOC_Os04g01650	MGG_08054	erythronate-4-phosphate dehydrogenase domain containing protein	Chitinase 1	N	N	0.56
LOC_Os04g01660	MGG_08054	erythronate-4-phosphate dehydrogenase domain containing protein	Chitinase 1	N	N	0.67
LOC_Os06g29220	MGG_08054	erythronate-4-phosphate dehydrogenase domain containing protein	Chitinase 1	N	N	0.59
LOC_Os06g39960	MGG_08054	bZIP transcription factor domain containing protein	Chitinase 1	N	N	0.503333
LOC_Os07g16040	MGG_08054	erythronate-4-phosphate dehydrogenase domain containing protein	Chitinase 1	N	N	0.56
LOC_Os08g38020	MGG_08054	bZIP transcription factor domain containing protein	Chitinase 1	N	N	0.565714
LOC_Os08g43600	MGG_08054	bZIP transcription factor domain containing protein	Chitinase 1	N	N	0.72
LOC_Os09g10840	MGG_08054	transcription factor	Chitinase 1	N	N	0.51
LOC_Os09g36910	MGG_08054	bZIP transcription factor domain containing protein	Chitinase 1	N	N	0.63
LOC_Os05g48020	MGG_08082	SNARE domain containing protein	SNARE domain-containing protein	N	N	0.51
LOC_Os03g64110	MGG_08096	WD domain, G-beta repeat domain containing protein	Transmembrane emp24 domain-containing protein 9	N	N	0.52
LOC_Os02g16680	MGG_08132	bZIP transcription factor domain containing protein	Putative uncharacterized protein	N	N	0.5725
LOC_Os02g49560	MGG_08132	bZIP transcription factor domain containing protein	Putative uncharacterized protein	N	N	0.57
LOC_Os06g39960	MGG_08132	bZIP transcription factor domain containing protein	Putative uncharacterized protein	N	N	0.61
LOC_Os02g14910	MGG_08164	bZIP transcription factor family protein	Protein disulfide-isomerase erp38	N	N	0.72
LOC_Os02g57530	MGG_08164	ethylene receptor	Protein disulfide-isomerase erp38	N	N	0.505
LOC_Os04g40600	MGG_08164	peptide methionine sulfoxide reductase	Protein disulfide-isomerase erp38	N	N	0.55
LOC_Os04g40620	MGG_08164	peptide methionine sulfoxide reductase	Protein disulfide-isomerase erp38	N	N	0.54
LOC_Os05g37170	MGG_08164	transcription factor	Protein disulfide-isomerase erp38	N	N	0.7
LOC_Os09g07570	MGG_08164	ferredoxin-thioredoxin reductase catalytic chain, chloroplast precursor	Protein disulfide-isomerase erp38	N	N	0.51
LOC_Os11g28310	MGG_08164	P21-Rho-binding domain containing protein	Protein disulfide-isomerase erp38	N	N	0.71
LOC_Os12g05680	MGG_08164	transcription factor	Protein disulfide-isomerase erp38	N	N	0.51
LOC_Os03g17690	MGG_08200	OsAPx1 - Cytosolic Ascorbate Peroxidase encoding gene 1-8	Putative uncharacterized protein	Y	N	0.54
LOC_Os07g49400	MGG_08200	OsAPx2 - Cytosolic Ascorbate Peroxidase encoding gene 4,5,6,8	Putative uncharacterized protein	Y	N	0.53
LOC_Os01g07640	MGG_08265	ankyrin	Putative uncharacterized protein	N	N	0.64
LOC_Os01g61990	MGG_08265	ankyrin repeat-containing protein	Putative uncharacterized protein	N	N	0.51
LOC_Os03g17240	MGG_08265	ankyrin repeat-containing protein	Putative uncharacterized protein	N	N	0.52
LOC_Os03g47720	MGG_08265	ankyrin	Putative uncharacterized protein	N	N	0.58
LOC_Os05g02130	MGG_08265	ankyrin repeat domain-containing protein 28	Putative uncharacterized protein	N	N	0.52
LOC_Os05g23320	MGG_08265	expressed protein	Putative uncharacterized protein	N	N	0.51
LOC_Os07g43030	MGG_08265	calmodulin-binding transcription activator	Putative uncharacterized protein	N	N	0.89
LOC_Os08g15840	MGG_08265	ankyrin repeat-rich protein	Putative uncharacterized protein	N	N	0.53
LOC_Os11g14520	MGG_08265	expressed protein	Putative uncharacterized protein	N	N	0.58
LOC_Os01g05960	MGG_08304	receptor kinase	Mechanosensitive ion channel family protein	N	N	0.57
LOC_Os01g35100	MGG_08304	zinc finger, C3HC4 type domain containing protein	Mechanosensitive ion channel family protein	N	N	0.51
LOC_Os01g58780	MGG_08304	zinc finger, C3HC4 type domain containing protein	Mechanosensitive ion channel family protein	N	N	0.73
LOC_Os02g33720	MGG_08304	RING-H2 finger protein	Mechanosensitive ion channel family protein	N	N	0.56
LOC_Os02g45390	MGG_08304	RING-H2 finger protein	Mechanosensitive ion channel family protein	N	N	0.65
LOC_Os02g54624	MGG_08304	zinc finger family protein	Mechanosensitive ion channel family protein	N	N	0.58
LOC_Os03g22830	MGG_08304	zinc finger, C3HC4 type domain containing protein	Mechanosensitive ion channel family protein	N	N	0.58
LOC_Os04g41050	MGG_08304	zinc finger, C3HC4 type domain containing protein	Mechanosensitive ion channel family protein	N	N	0.7
LOC_Os04g41070	MGG_08304	zinc finger, C3HC4 type domain containing protein	Mechanosensitive ion channel family protein	N	N	0.65
LOC_Os06g10800	MGG_08304	zinc finger family protein	Mechanosensitive ion channel family protein	N	N	0.82
LOC_Os06g11450	MGG_08304	zinc finger, C3HC4 type domain containing protein	Mechanosensitive ion channel family protein	N	N	0.68
LOC_Os06g34860	MGG_08304	Zinc finger, C3HC4 type domain containing protein	Mechanosensitive ion channel family protein	N	N	0.67
LOC_Os06g42700	MGG_08304	zinc finger, C3HC4 type domain containing protein	Mechanosensitive ion channel family protein	N	N	0.55
LOC_Os07g31850	MGG_08304	zinc finger, C3HC4 type domain containing protein	Mechanosensitive ion channel family protein	N	N	0.51
LOC_Os08g42640	MGG_08304	zinc finger, C3HC4 type domain containing protein	Mechanosensitive ion channel family protein	N	N	0.51
LOC_Os08g43480	MGG_08304	zinc finger, C3HC4 type family protein	Mechanosensitive ion channel family protein	N	N	0.55
LOC_Os08g43670	MGG_08304	RING-H2 finger protein ATL2B	Mechanosensitive ion channel family protein	N	N	0.61
LOC_Os09g29310	MGG_08304	zinc finger, C3HC4 type domain containing protein	Mechanosensitive ion channel family protein	N	N	0.54
LOC_Os11g47690	MGG_08304	zinc finger, C3HC4 type domain containing protein	Mechanosensitive ion channel family protein	N	N	0.66
LOC_Os12g01750	MGG_08304	zinc finger, C3HC4 type domain containing protein	Mechanosensitive ion channel family protein	N	N	0.56
LOC_Os03g61110	MGG_08306	RNA-binding motif protein	Abhydrolase domain-containing protein 12	N	N	0.73
LOC_Os03g54790	MGG_08309	ABC transporter, ATP-binding protein	Multidrug resistance-associated protein 2	Y	N	0.57
LOC_Os04g33700	MGG_08309	ABC transmembrane transporter domain containing protein	Multidrug resistance-associated protein 2	Y	N	0.52
LOC_Os05g07000	MGG_08378	splicing factor, arginine/serine-rich 7	Cytochrome P450 oxidoreductase GliF	N	N	0.54
LOC_Os05g12040	MGG_08387	cytochrome P450 51	Cytochrome P450 oxidoreductase GliF	Y	N	0.61
LOC_Os07g37970	MGG_08387	cytochrome P450 51	Cytochrome P450 oxidoreductase GliF	Y	N	0.53
LOC_Os10g21050	MGG_08387	cytochrome P450	Cytochrome P450 oxidoreductase GliF	Y	N	0.53
LOC_Os05g31890	MGG_08401	aspartyl protease family protein	Endo-1,4-beta-xylanase B	Y	N	0.51
LOC_Os02g33860	MGG_08415	WD domain, G-beta repeat domain containing protein	Serin endopeptidase	N	N	0.61
LOC_Os02g50740	MGG_08415	WD domain, G-beta repeat domain containing protein	Serin endopeptidase	N	N	0.55
LOC_Os04g43130	MGG_08415	transcriptional corepressor LEUNIG	Serin endopeptidase	N	N	0.56
LOC_Os06g04040	MGG_08415	WD domain, G-beta repeat domain containing protein	Serin endopeptidase	N	N	0.54
LOC_Os09g36900	MGG_08415	WD domain, G-beta repeat domain containing protein	Serin endopeptidase	N	N	0.5575
LOC_Os12g36240	MGG_08415	inhibitor I family protein	Serin endopeptidase	Y	N	0.57
LOC_Os03g48090	MGG_08436	WD domain, G-beta repeat domain containing protein	Minor extracellular protease vpr	N	N	0.69
LOC_Os04g51110	MGG_08436	WD repeat-containing protein	Minor extracellular protease vpr	N	N	0.54
LOC_Os06g48190	MGG_08467	expressed protein	Putative uncharacterized protein	N	N	0.61
LOC_Os01g09252	MGG_08486	WD domain, G-beta repeat domain containing protein	Beta-lactamase	N	N	0.65
LOC_Os03g42770	MGG_08486	expressed protein	Beta-lactamase	N	N	0.58
LOC_Os06g04040	MGG_08486	WD domain, G-beta repeat domain containing protein	Beta-lactamase	N	N	0.79
LOC_Os01g01150	MGG_08523	RNA recognition motif	Laccase-1	N	N	0.51
LOC_Os02g11930	MGG_08622	receptor-like protein kinase precursor	Nucleoside diphosphate kinase	N	N	0.53
LOC_Os02g21970	MGG_08622	26S protease regulatory subunit 6B	Nucleoside diphosphate kinase	N	N	0.52
LOC_Os05g51700	MGG_08622	nucleoside diphosphate kinase	Nucleoside diphosphate kinase	Y	Y	0.79
LOC_Os07g30970	MGG_08622	nucleoside diphosphate kinase	Nucleoside diphosphate kinase	Y	Y	0.85
LOC_Os07g35730	MGG_08622	TKL_IRAK_DUF26-lc.23 - DUF26 kinases have homology to DUF26 containing loci	Nucleoside diphosphate kinase	N	N	0.51
LOC_Os10g41410	MGG_08622	nucleoside diphosphate kinase	Nucleoside diphosphate kinase	Y	Y	0.8
LOC_Os12g36194	MGG_08622	nucleoside diphosphate kinase	Nucleoside diphosphate kinase	Y	Y	0.67
LOC_Os07g47630	MGG_08760	RNA recognition motif containing protein	High-affinity nicotinic acid transporter	N	N	0.51
LOC_Os09g03610	MGG_08760	flowering time control protein FCA	High-affinity nicotinic acid transporter	N	N	0.57
LOC_Os11g08370	MGG_08770	transporter, major facilitator family	Putative uncharacterized protein	Y	N	0.539167
LOC_Os12g07970	MGG_08770	transporter, major facilitator family	Putative uncharacterized protein	Y	N	0.549167
LOC_Os04g40630	MGG_08774	BTBZ4 - Bric-a-Brac, Tramtrack, Broad Complex BTB domain with TAZ zinc finger and Calmodulin-binding domains	Chitin deacetylase	N	N	0.54
LOC_Os07g15490	MGG_08774	C2-BTB1 - Bric-a-Brac, Tramtrack, Broad Complex BTB domain with C2 subfamily conserved sequence	Chitin deacetylase	N	N	0.51
LOC_Os10g29920	MGG_08774	snRNP protein	Chitin deacetylase	N	N	0.59
LOC_Os12g02030	MGG_08774	BTB9 - Bric-a-Brac, Tramtrack, Broad Complex BTB domain	Chitin deacetylase	N	N	0.61
LOC_Os11g41840	MGG_08776	transporter family protein	Major myo-inositol transporter iolT	Y	N	0.51
LOC_Os10g40360	MGG_08783	proline oxidase, mitochondrial precursor	Putative uncharacterized protein	Y	N	0.51
LOC_Os05g01820	MGG_08832	cytochrome b5-like Heme/Steroid binding domain containing protein	C-5 sterol desaturase	N	N	0.51
LOC_Os10g37420	MGG_08832	cytochrome b5-like Heme/Steroid binding domain containing protein	C-5 sterol desaturase	N	N	0.57
LOC_Os12g12170	MGG_08832	cytochrome b5-like Heme/Steroid binding domain containing protein	C-5 sterol desaturase	N	N	0.91
LOC_Os07g28090	MGG_08918	ABC transporter, ATP-binding protein	ATP-binding cassette sub-family G member 2	Y	N	0.51
LOC_Os11g39020	MGG_08918	ABC transporter, ATP-binding protein	ATP-binding cassette sub-family G member 2	Y	N	0.51
LOC_Os05g25630	MGG_08966	inhibitor I family protein	Cuticle-degrading protease	Y	N	0.54
LOC_Os12g36210	MGG_08966	inhibitor I family protein	Cuticle-degrading protease	Y	N	0.58
LOC_Os12g36240	MGG_08966	inhibitor I family protein	Cuticle-degrading protease	Y	N	0.57
LOC_Os12g40550	MGG_08966	peptidase	Cuticle-degrading protease	N	N	0.54
LOC_Os12g41260	MGG_08966	protein kinase domain containing protein	Cuticle-degrading protease	N	N	0.51
LOC_Os04g29920	MGG_08970	reticulon domain containing protein	Leptomycin B resistance protein pmd1	N	N	0.58
LOC_Os05g06190	MGG_08970	expressed protein	Leptomycin B resistance protein pmd1	Y	N	0.521667
LOC_Os02g49560	MGG_08973	bZIP transcription factor domain containing protein	Putative uncharacterized protein	N	N	0.6
LOC_Os03g49500	MGG_08973	ethylene receptor	Putative uncharacterized protein	N	N	0.51
LOC_Os04g54860	MGG_08973	glutaredoxin	Putative uncharacterized protein	N	N	0.53
LOC_Os08g07450	MGG_08973	glutaredoxin protein	Putative uncharacterized protein	N	N	0.76
LOC_Os08g26880	MGG_08973	bZIP transcription factor domain containing protein	Putative uncharacterized protein	N	N	0.61
LOC_Os12g18360	MGG_08973	NB-ARC domain containing protein	Putative uncharacterized protein	Y	N	0.52
LOC_Os05g34880	MGG_09073	zinc finger, C3HC4 type family protein	Minor extracellular protease vpr	N	N	0.54
LOC_Os06g44370	MGG_09073	WD domain, G-beta repeat domain containing protein	Minor extracellular protease vpr	N	N	0.65
LOC_Os09g12710	MGG_09073	WD domain, G-beta repeat domain containing protein	Minor extracellular protease vpr	N	N	0.61
LOC_Os10g35060	MGG_09098	Ser/Thr protein phosphatase family protein	Endo-1,4-beta-xylanase	N	N	0.54
LOC_Os01g03370	MGG_09125	senescence-induced receptor-like serine/threonine-protein kinase precursor	High osmolarity signaling protein SHO1	N	N	0.55
LOC_Os02g11960	MGG_09125	ABC transporter, ATP-binding protein	High osmolarity signaling protein SHO1	N	N	0.63
LOC_Os03g13170	MGG_09125	ubiquitin fusion protein	High osmolarity signaling protein SHO1	Y	N	0.56
LOC_Os03g16000	MGG_09125	src homology-3 domain protein 3	High osmolarity signaling protein SHO1	N	N	0.61
LOC_Os03g44484	MGG_09125	DNA-directed RNA polymerase II subunit RPB2	High osmolarity signaling protein SHO1	N	N	0.66
LOC_Os03g50010	MGG_09125	toc64	High osmolarity signaling protein SHO1	N	N	0.57
LOC_Os03g63480	MGG_09125	ankyrin repeat domain containing protein	High osmolarity signaling protein SHO1	N	N	0.54
LOC_Os05g22830	MGG_09125	DNA-directed RNA polymerase subunit beta	High osmolarity signaling protein SHO1	N	N	0.66
LOC_Os06g49970	MGG_09125	alpha-amylase precursor	High osmolarity signaling protein SHO1	N	N	0.58
LOC_Os07g23110	MGG_09125	poly synthetase 1	High osmolarity signaling protein SHO1	N	N	0.63
LOC_Os08g01740	MGG_09125	VHS and GAT domain containing protein	High osmolarity signaling protein SHO1	N	N	0.53
LOC_Os08g08760	MGG_09125	ubiquitin family protein	High osmolarity signaling protein SHO1	Y	N	0.55
LOC_Os08g42690	MGG_09125	ankyrin repeat domain containing protein	High osmolarity signaling protein SHO1	N	N	0.6
LOC_Os09g17120	MGG_09125	ankyrin repeat domain containing protein	High osmolarity signaling protein SHO1	N	N	0.51
LOC_Os09g39500	MGG_09125	ubiquitin fusion protein	High osmolarity signaling protein SHO1	Y	N	0.56
LOC_Os10g34970	MGG_09125	expressed protein	High osmolarity signaling protein SHO1	Y	N	0.65
LOC_Os04g08836	MGG_09156	cytochrome P450 79A1	Putative uncharacterized protein	Y	N	0.51
LOC_Os02g36520	MGG_09205	OsFBK9 - F-box domain and kelch repeat containing protein	E3 ubiquitin-protein ligase HRD1	N	N	0.57
LOC_Os09g38300	MGG_09205	OsFBK20 - F-box domain and kelch repeat containing protein	E3 ubiquitin-protein ligase HRD1	N	N	0.77
LOC_Os04g58130	MGG_09209	katanin p80 WD40 repeat-containing subunit B1 homolog 1	Phosphatase DCR2	N	N	0.57
LOC_Os06g13120	MGG_09209	expressed protein	Phosphatase DCR2	N	N	0.69
LOC_Os06g45140	MGG_09209	bZIP transcription factor domain containing protein	Phosphatase DCR2	N	N	0.51
LOC_Os07g14830	MGG_09209	WD domain, G-beta repeat domain containing protein	Phosphatase DCR2	N	N	0.53
LOC_Os07g22220	MGG_09209	F-box-like/WD repeat-containing protein TBL1XR1-A	Phosphatase DCR2	N	N	0.5125
LOC_Os07g33200	MGG_09209	expressed protein	Phosphatase DCR2	N	N	0.55
LOC_Os08g18150	MGG_09209	WD domain, G-beta repeat domain containing protein	Phosphatase DCR2	N	N	0.55
LOC_Os09g12710	MGG_09209	WD domain, G-beta repeat domain containing protein	Phosphatase DCR2	N	N	0.53
LOC_Os09g15950	MGG_09209	expressed protein	Phosphatase DCR2	N	N	0.6
LOC_Os12g03540	MGG_09209	WD domain, G-beta repeat domain containing protein	Phosphatase DCR2	N	N	0.59
LOC_Os06g04800	MGG_09210	peptidase, T1 family	Ssh-4	N	N	0.54
LOC_Os07g40030	MGG_09210	WD domain, G-beta repeat domain containing protein	Ssh-4	N	N	0.53
LOC_Os09g19900	MGG_09210	WD domain, G-beta repeat domain containing protein	Ssh-4	N	N	0.533333
LOC_Os02g14910	MGG_09243	bZIP transcription factor family protein	GPI mannosyltransferase 1	N	N	0.53
LOC_Os02g16680	MGG_09243	bZIP transcription factor domain containing protein	GPI mannosyltransferase 1	N	N	0.66
LOC_Os09g34060	MGG_09243	transcription factor RF2a	GPI mannosyltransferase 1	N	N	0.54
LOC_Os05g25630	MGG_09246	inhibitor I family protein	Protease	Y	N	0.54
LOC_Os08g38880	MGG_09246	WD-40 repeat family protein	Protease	N	N	0.72
LOC_Os12g40550	MGG_09246	peptidase	Protease	N	N	0.64
LOC_Os01g59350	MGG_09260	transcription factor	Integral membrane protein	N	N	0.536667
LOC_Os01g64020	MGG_09260	transcription factor	Integral membrane protein	N	N	0.63
LOC_Os07g03220	MGG_09260	bZIP transcription factor domain containing protein	Integral membrane protein	N	N	0.65
LOC_Os09g10840	MGG_09260	transcription factor	Integral membrane protein	N	N	0.68
LOC_Os01g60270	MGG_09322	homeobox domain containing protein	Putative uncharacterized protein	N	N	0.69
LOC_Os02g32430	MGG_09322	WD domain, G-beta repeat domain containing protein	Putative uncharacterized protein	N	N	0.64
LOC_Os03g54770	MGG_09322	WD domain, G-beta repeat domain containing protein	Putative uncharacterized protein	N	N	0.54
LOC_Os04g46892	MGG_09322	WD domain, G-beta repeat domain containing protein	Putative uncharacterized protein	N	N	0.57
LOC_Os10g38080	MGG_09322	OsSub61 - Putative Subtilisin homologue	Putative uncharacterized protein	Y	N	0.56
LOC_Os01g45570	MGG_09352	homeobox associated leucine zipper	Minor extracellular protease vpr	N	N	0.55
LOC_Os04g43130	MGG_09352	transcriptional corepressor LEUNIG	Minor extracellular protease vpr	N	N	0.52
LOC_Os06g07540	MGG_09352	WD-40 repeat family protein	Minor extracellular protease vpr	N	N	0.51
LOC_Os06g44370	MGG_09352	WD domain, G-beta repeat domain containing protein	Minor extracellular protease vpr	N	N	0.7
LOC_Os07g22220	MGG_09352	F-box-like/WD repeat-containing protein TBL1XR1-A	Minor extracellular protease vpr	N	N	0.65
LOC_Os07g34880	MGG_09352	homeobox domain containing protein	Minor extracellular protease vpr	N	N	0.51
LOC_Os11g01130	MGG_09352	homeobox domain containing protein	Minor extracellular protease vpr	N	N	0.58
LOC_Os11g07480	MGG_09352	WD domain, G-beta repeat domain containing protein	Minor extracellular protease vpr	N	N	0.63
LOC_Os12g01120	MGG_09352	homeobox domain containing protein	Minor extracellular protease vpr	N	N	0.58
LOC_Os03g47650	MGG_09360	ankyrin	Endonuclease/exonuclease/phosphatase	N	N	0.6
LOC_Os04g50660	MGG_09360	WD domain, G-beta repeat domain containing protein	Endonuclease/exonuclease/phosphatase	N	N	0.57
LOC_Os10g35200	MGG_09360	katanin p80 WD40 repeat-containing subunit B1 homolog 1	Endonuclease/exonuclease/phosphatase	N	N	0.55
LOC_Os05g07060	MGG_09372	fasciclin domain containing protein	Putative uncharacterized protein	Y	N	0.59
LOC_Os03g60930	MGG_09380	RNA recognition motif containing protein	Putative uncharacterized protein	N	N	0.58
LOC_Os02g50770	MGG_09398	peroxidase precursor	Putative uncharacterized protein	Y	N	0.56
LOC_Os03g17690	MGG_09398	OsAPx1 - Cytosolic Ascorbate Peroxidase encoding gene 1-8	Putative uncharacterized protein	Y	N	0.54
LOC_Os04g14680	MGG_09398	OsAPx3 - Peroxisomal Ascorbate Peroxidase encoding gene 5,8	Putative uncharacterized protein	Y	N	0.72
LOC_Os04g59190	MGG_09398	peroxidase precursor	Putative uncharacterized protein	Y	N	0.53
LOC_Os04g59200	MGG_09398	peroxidase precursor	Putative uncharacterized protein	Y	N	0.53
LOC_Os04g59260	MGG_09398	peroxidase precursor	Putative uncharacterized protein	Y	N	0.54
LOC_Os06g48000	MGG_09398	peroxidase precursor	Putative uncharacterized protein	Y	N	0.53
LOC_Os06g48010	MGG_09398	peroxidase precursor	Putative uncharacterized protein	Y	N	0.53
LOC_Os07g49400	MGG_09398	OsAPx2 - Cytosolic Ascorbate Peroxidase encoding gene 4,5,6,8	Putative uncharacterized protein	Y	N	0.54
LOC_Os08g43560	MGG_09398	OsAPx4 - Peroxisomal Ascorbate Peroxidase encoding gene 5,8,9	Putative uncharacterized protein	Y	N	0.71
LOC_Os02g56020	MGG_09419	methyltransferase	LysM domain-containing protein	N	N	0.518571
LOC_Os04g36710	MGG_09419	methyltransferase domain containing protein	LysM domain-containing protein	N	N	0.58
LOC_Os09g03680	MGG_09419	ankyrin	LysM domain-containing protein	N	N	0.62
LOC_Os10g34420	MGG_09419	lysM domain containing protein	LysM domain-containing protein	Y	N	0.68
LOC_Os10g38040	MGG_09419	lysM domain containing protein	LysM domain-containing protein	Y	N	0.58
LOC_Os11g14570	MGG_09419	expressed protein	LysM domain-containing protein	N	N	0.58
LOC_Os10g40950	MGG_09440	polyol transporter 5	MFS transporter	N	N	0.593333
LOC_Os01g57400	MGG_09548	lysM domain containing protein	Putative uncharacterized protein	Y	N	0.71
LOC_Os02g29160	MGG_09548	ankyrin	Putative uncharacterized protein	N	N	0.81
LOC_Os06g43680	MGG_09548	palmitoyltransferase TIP1	Putative uncharacterized protein	N	N	0.79
LOC_Os10g34420	MGG_09548	lysM domain containing protein	Putative uncharacterized protein	Y	N	0.53
LOC_Os11g14520	MGG_09548	expressed protein	Putative uncharacterized protein	N	N	0.78
LOC_Os11g14544	MGG_09548	expressed protein	Putative uncharacterized protein	N	N	0.68
LOC_Os11g14570	MGG_09548	expressed protein	Putative uncharacterized protein	N	N	0.82
LOC_Os01g09370	MGG_09639	ankyrin repeat domain-containing protein 28	Alpha-1,3-glucan synthase Ags2	N	N	0.54
LOC_Os01g42820	MGG_09639	RNA recognition motif containing protein	Alpha-1,3-glucan synthase Ags2	N	N	0.72
LOC_Os02g03890	MGG_09639	nuclear transport factor 2	Alpha-1,3-glucan synthase Ags2	N	N	0.68
LOC_Os02g07070	MGG_09639	RNA recognition motif family protein	Alpha-1,3-glucan synthase Ags2	N	N	0.75
LOC_Os02g29040	MGG_09639	ankyrin repeat domain containing protein	Alpha-1,3-glucan synthase Ags2	N	N	0.51
LOC_Os02g31290	MGG_09639	AML1	Alpha-1,3-glucan synthase Ags2	N	N	0.67
LOC_Os02g48790	MGG_09639	AML1	Alpha-1,3-glucan synthase Ags2	N	N	0.56
LOC_Os03g46910	MGG_09639	pyruvate kinase	Alpha-1,3-glucan synthase Ags2	N	N	0.62
LOC_Os04g37690	MGG_09639	RNA recognition motif containing protein	Alpha-1,3-glucan synthase Ags2	N	N	0.71
LOC_Os04g45930	MGG_09639	RNA recognition motif containing protein	Alpha-1,3-glucan synthase Ags2	N	N	0.52
LOC_Os04g52960	MGG_09639	nucleolin	Alpha-1,3-glucan synthase Ags2	N	N	0.59
LOC_Os04g54440	MGG_09639	RNA binding protein	Alpha-1,3-glucan synthase Ags2	N	N	0.57
LOC_Os05g01240	MGG_09639	AML1	Alpha-1,3-glucan synthase Ags2	N	N	0.54
LOC_Os05g13650	MGG_09639	RNA recognition motif containing protein	Alpha-1,3-glucan synthase Ags2	N	N	0.56
LOC_Os07g27110	MGG_09639	RNA recognition motif containing protein	Alpha-1,3-glucan synthase Ags2	N	N	0.66
LOC_Os07g42380	MGG_09639	RNA recognition motif containing protein	Alpha-1,3-glucan synthase Ags2	N	N	0.63
LOC_Os08g38410	MGG_09639	RNA recognition motif containing protein	Alpha-1,3-glucan synthase Ags2	N	N	0.61
LOC_Os09g03610	MGG_09639	flowering time control protein FCA	Alpha-1,3-glucan synthase Ags2	N	N	0.66
LOC_Os11g40510	MGG_09639	RNA recognition motif containing protein	Alpha-1,3-glucan synthase Ags2	N	N	0.58
LOC_Os04g36740	MGG_09640	potassium channel SKOR	Alpha-amylase 1	N	N	0.901333
LOC_Os06g47300	MGG_09640	RNA recognition motif containing protein	Alpha-amylase 1	N	N	0.56
LOC_Os03g22780	MGG_09668	DVR	Gut esterase 1	N	N	0.63
LOC_Os05g22614	MGG_09668	PTAC16	Gut esterase 1	N	N	0.61
LOC_Os01g61460	MGG_09735	leaf senescence related protein	Putative uncharacterized protein	N	N	0.55
LOC_Os06g41100	MGG_09735	transcription factor	Putative uncharacterized protein	N	N	0.54
LOC_Os11g06170	MGG_09735	bZIP transcriptional activator RSG	Putative uncharacterized protein	N	N	0.61
LOC_Os02g57220	MGG_09817	WD domain, G-beta repeat domain containing protein	Minor extracellular protease vpr	N	N	0.54
LOC_Os03g48090	MGG_09817	WD domain, G-beta repeat domain containing protein	Minor extracellular protease vpr	N	N	0.67
LOC_Os04g51110	MGG_09817	WD repeat-containing protein	Minor extracellular protease vpr	N	N	0.54
LOC_Os05g48990	MGG_09817	homeobox domain containing protein	Minor extracellular protease vpr	N	N	0.52
LOC_Os06g21930	MGG_09827	inorganic phosphate transporter	Sugar transporter	Y	N	0.57
LOC_Os04g06860	MGG_09834	peroxidase 28 precursor	Catalase-peroxidase 2	Y	N	0.55
LOC_Os06g48030	MGG_09834	peroxidase precursor	Catalase-peroxidase 2	Y	N	0.55
LOC_Os01g50820	MGG_09859	transporter, major facilitator family	Putative uncharacterized protein	N	N	0.56
LOC_Os12g03860	MGG_09859	major facilitator superfamily antiporter	Putative uncharacterized protein	N	N	0.56
LOC_Os01g59760	MGG_09886	bZIP transcription factor	Prohibitin-2	N	N	0.63
LOC_Os01g65530	MGG_09886	RNA recognition motif containing protein	Prohibitin-2	N	N	0.6
LOC_Os02g09830	MGG_09886	bZIP transcription factor domain containing protein	Prohibitin-2	N	N	0.55
LOC_Os02g31290	MGG_09886	AML1	Prohibitin-2	N	N	0.52
LOC_Os02g44890	MGG_09886	RNA-binding region RNP-1	Prohibitin-2	N	N	0.581667
LOC_Os03g58720	MGG_09886	RNA recognition motif containing protein	Prohibitin-2	N	N	0.55
LOC_Os04g50110	MGG_09886	RNA recognition motif containing protein	Prohibitin-2	N	N	0.6225
LOC_Os05g37170	MGG_09886	transcription factor	Prohibitin-2	N	N	0.72
LOC_Os06g03690	MGG_09886	RNA recognition motif containing protein	Prohibitin-2	N	N	0.54
LOC_Os07g01730	MGG_09886	WD-40 repeat family protein	Prohibitin-2	N	N	0.57
LOC_Os08g36790	MGG_09886	bZIP transcription factor	Prohibitin-2	N	N	0.6
LOC_Os08g38380	MGG_09886	RNA recognition motif containing protein	Prohibitin-2	N	N	0.51
LOC_Os08g42960	MGG_09886	ankyrin repeat-containing protein	Prohibitin-2	N	N	0.62
LOC_Os09g10760	MGG_09886	RNA recognition motif containing protein	Prohibitin-2	N	N	0.68
LOC_Os09g28310	MGG_09886	bZIP transcription factor	Prohibitin-2	N	N	0.54
LOC_Os09g36910	MGG_09886	bZIP transcription factor domain containing protein	Prohibitin-2	N	N	0.59
LOC_Os10g38820	MGG_09886	bZIP family transcription factor	Prohibitin-2	N	N	0.6
LOC_Os12g19590	MGG_09886	WD domain, G-beta repeat domain containing protein	Prohibitin-2	N	N	0.83
LOC_Os01g50080	MGG_09931	MDR-like ABC transporter	Lipid A export ATP-binding/permease msbA	Y	N	0.51
LOC_Os04g33700	MGG_09931	ABC transmembrane transporter domain containing protein	Lipid A export ATP-binding/permease msbA	Y	N	0.53
LOC_Os05g47500	MGG_09931	MDR-like ABC transporter	Lipid A export ATP-binding/permease msbA	Y	N	0.513333
LOC_Os06g36650	MGG_09931	ABC transporter family protein	Lipid A export ATP-binding/permease msbA	Y	N	0.53
LOC_Os06g41384	MGG_09931	zinc finger C-x8-C-x5-C-x3-H type family protein	Lipid A export ATP-binding/permease msbA	N	N	0.57
LOC_Os08g38410	MGG_09931	RNA recognition motif containing protein	Lipid A export ATP-binding/permease msbA	N	N	0.55
LOC_Os11g03890	MGG_09931	RNA recognition motif containing protein	Lipid A export ATP-binding/permease msbA	N	N	0.54
LOC_Os01g65550	MGG_09941	RNA recognition motif containing protein	Nod factor export ATP-binding protein I	N	N	0.55
LOC_Os02g51890	MGG_09941	RNA recognition motif containing protein	Nod factor export ATP-binding protein I	N	N	0.54
LOC_Os03g17760	MGG_09941	RNA recognition motif containing protein	Nod factor export ATP-binding protein I	N	N	0.62
LOC_Os05g04600	MGG_09941	ABC transmembrane transporter domain containing protein	Nod factor export ATP-binding protein I	N	N	0.55
LOC_Os08g23590	MGG_09941	ankyrin repeat domain containing protein	Nod factor export ATP-binding protein I	N	N	0.62
LOC_Os11g24780	MGG_09941	expressed protein	Nod factor export ATP-binding protein I	N	N	0.75
LOC_Os03g15350	MGG_09947	Sel1 repeat domain containing protein	Tricalbin-1	N	N	0.54
LOC_Os02g44300	MGG_09972	MSP domain containing protein	Putative uncharacterized protein	N	N	0.81
LOC_Os08g05890	MGG_09972	MSP domain containing protein	Putative uncharacterized protein	N	N	0.55
LOC_Os01g45400	MGG_09977	ubiquitin family protein	Ubiquitin-conjugating enzyme	Y	Y	0.69
LOC_Os01g45420	MGG_09977	ubiquitin family protein	Ubiquitin-conjugating enzyme	Y	Y	0.57
LOC_Os02g06640	MGG_09977	ubiquitin family protein	Ubiquitin-conjugating enzyme	Y	Y	0.63
LOC_Os02g29080	MGG_09977	conserved hypothetical protein	Ubiquitin-conjugating enzyme	N	N	0.52
LOC_Os03g31260	MGG_09977	cysteine-rich receptor-like protein kinase 28 precursor	Ubiquitin-conjugating enzyme	N	N	0.67
LOC_Os04g53620	MGG_09977	ubiquitin family protein	Ubiquitin-conjugating enzyme	Y	Y	0.6
LOC_Os05g42424	MGG_09977	ubiquitin family protein	Ubiquitin-conjugating enzyme	Y	Y	0.62
LOC_Os06g44080	MGG_09977	ubiquitin family protein	Ubiquitin-conjugating enzyme	Y	Y	0.55
LOC_Os06g46770	MGG_09977	ubiquitin family protein	Ubiquitin-conjugating enzyme	Y	Y	0.62
LOC_Os09g25320	MGG_09977	ubiquitin family protein	Ubiquitin-conjugating enzyme	Y	Y	0.55
LOC_Os03g03150	MGG_09990	WD repeat-containing protein	Minor extracellular protease vpr	N	N	0.53
LOC_Os03g10210	MGG_09990	homeobox domain containing protein	Minor extracellular protease vpr	N	N	0.55
LOC_Os04g40560	MGG_09990	WD domain, G-beta repeat domain containing protein	Minor extracellular protease vpr	N	N	0.6
LOC_Os05g48990	MGG_09990	homeobox domain containing protein	Minor extracellular protease vpr	N	N	0.58
LOC_Os07g22220	MGG_09990	F-box-like/WD repeat-containing protein TBL1XR1-A	Minor extracellular protease vpr	N	N	0.54
LOC_Os07g34880	MGG_09990	homeobox domain containing protein	Minor extracellular protease vpr	N	N	0.56
LOC_Os07g41190	MGG_09990	WD domain, G-beta repeat domain containing protein	Minor extracellular protease vpr	N	N	0.57
LOC_Os09g06680	MGG_09990	WD domain, G-beta repeat domain containing protein	Minor extracellular protease vpr	N	N	0.55
LOC_Os11g10640	MGG_09990	protein kinase domain containing protein	Minor extracellular protease vpr	N	N	0.6
LOC_Os01g59660	MGG_10013	MYB family transcription factor	Putative uncharacterized protein	N	N	0.62
LOC_Os05g46610	MGG_10013	myb-like DNA-binding domain containing protein	Putative uncharacterized protein	N	N	0.62
LOC_Os06g04960	MGG_10013	expressed protein	Putative uncharacterized protein	N	N	0.64
LOC_Os06g45720	MGG_10013	BTB/POZ domain containing protein	Putative uncharacterized protein	N	N	0.68
LOC_Os06g47890	MGG_10013	OsFBO9 - F-box and other domain containing protein	Putative uncharacterized protein	N	N	0.72
LOC_Os07g43580	MGG_10013	MYB family transcription factor	Putative uncharacterized protein	N	N	0.61
LOC_Os07g47260	MGG_10013	H-BTB7 - Bric-a-Brac, Tramtrack, Broad Complex BTB domain with H family conserved sequence	Putative uncharacterized protein	N	N	0.52
LOC_Os08g41150	MGG_10013	MBTB30 - Bric-a-Brac, Tramtrack, Broad Complex BTB domain with Meprin and TRAF Homology MATH domain	Putative uncharacterized protein	N	N	0.51
LOC_Os10g29050	MGG_10013	MBTB43 - Bric-a-Brac, Tramtrack, Broad Complex BTB domain with Meprin and TRAF Homology MATH domain	Putative uncharacterized protein	N	N	0.55
LOC_Os10g29810	MGG_10013	MBTB58 - Bric-a-Brac, Tramtrack, Broad Complex BTB domain with Meprin and TRAF Homology MATH domain	Putative uncharacterized protein	N	N	0.55
LOC_Os01g47710	MGG_10083	homeobox domain containing protein	Endoglucanase 3	N	N	0.53
LOC_Os02g29190	MGG_10098	ankyrin	Putative uncharacterized protein	N	N	0.66
LOC_Os06g13120	MGG_10098	expressed protein	Putative uncharacterized protein	N	N	0.51
LOC_Os12g12810	MGG_10098	ankyrin repeat family protein	Putative uncharacterized protein	N	N	0.58
LOC_Os03g03680	MGG_10112	transporter family protein	Putative uncharacterized protein	N	N	0.58
LOC_Os09g39180	MGG_10112	RNA recognition motif containing protein	Putative uncharacterized protein	N	N	0.57
LOC_Os01g27470	MGG_10131	ubiquitin family domain containing protein	MFS transporter	N	N	0.51
LOC_Os01g57220	MGG_10131	secretory carrier-associated membrane protein	MFS transporter	N	N	0.52
LOC_Os01g64020	MGG_10131	transcription factor	MFS transporter	N	N	0.64
LOC_Os02g02580	MGG_10131	expressed protein	MFS transporter	N	N	0.74
LOC_Os02g09830	MGG_10131	bZIP transcription factor domain containing protein	MFS transporter	N	N	0.51
LOC_Os03g13614	MGG_10131	transcription factor	MFS transporter	N	N	0.55
LOC_Os05g41280	MGG_10131	transcription factor HBP-1b	MFS transporter	N	N	0.52
LOC_Os06g16170	MGG_10131	expressed protein	MFS transporter	N	N	0.62
LOC_Os06g16240	MGG_10131	expressed protein	MFS transporter	N	N	0.65
LOC_Os06g44900	MGG_10131	leaf senescence related protein	MFS transporter	N	N	0.58
LOC_Os07g48660	MGG_10131	bZIP transcription factor domain containing protein	MFS transporter	N	N	0.52
LOC_Os10g39760	MGG_10131	WD domain, G-beta repeat domain containing protein	MFS transporter	N	N	0.53
LOC_Os01g59760	MGG_10145	bZIP transcription factor	Putative uncharacterized protein	N	N	0.57
LOC_Os03g19370	MGG_10145	CPuORF4 - conserved peptide uORF-containing transcript	Putative uncharacterized protein	N	N	0.61
LOC_Os03g19375	MGG_10145	expressed protein	Putative uncharacterized protein	N	N	0.61
LOC_Os07g39350	MGG_10145	transporter family protein	Putative uncharacterized protein	Y	N	0.53
LOC_Os09g36910	MGG_10145	bZIP transcription factor domain containing protein	Putative uncharacterized protein	N	N	0.58
LOC_Os10g40950	MGG_10145	polyol transporter 5	Putative uncharacterized protein	Y	N	0.522333
LOC_Os11g06170	MGG_10145	bZIP transcriptional activator RSG	Putative uncharacterized protein	N	N	0.61
LOC_Os09g03610	MGG_10147	flowering time control protein FCA	Multidrug resistance protein fnx1	N	N	0.55
LOC_Os01g68620	MGG_10171	signal peptide peptidase-like 2B	Leucine aminopeptidase 1	Y	N	0.55
LOC_Os01g07880	MGG_10208	transcription factor HY5	starch binding domain-containing protein	N	N	0.505833
LOC_Os06g15480	MGG_10208	transcription factor	starch binding domain-containing protein	N	N	0.565
LOC_Os06g50480	MGG_10208	bZIP transcription factor domain containing protein	starch binding domain-containing protein	N	N	0.77
LOC_Os07g03220	MGG_10208	bZIP transcription factor domain containing protein	starch binding domain-containing protein	N	N	0.67
LOC_Os11g06170	MGG_10208	bZIP transcriptional activator RSG	starch binding domain-containing protein	N	N	0.6
LOC_Os12g37410	MGG_10208	CPuORF5 - conserved peptide uORF-containing transcript	starch binding domain-containing protein	N	N	0.68
LOC_Os12g37415	MGG_10208	expressed protein	starch binding domain-containing protein	N	N	0.68
LOC_Os03g59550	MGG_10277	RNA recognition motif containing protein	Putative uncharacterized protein	N	N	0.61
LOC_Os06g38950	MGG_10277	ABC transporter, ATP-binding protein	Putative uncharacterized protein	Y	N	0.55
LOC_Os08g30740	MGG_10277	ABC transporter, ATP-binding protein	Putative uncharacterized protein	Y	N	0.51
LOC_Os08g30770	MGG_10277	ABC transporter, ATP-binding protein	Putative uncharacterized protein	Y	N	0.56
LOC_Os01g43540	MGG_10289	suppressor of G2 allele of SKP1	Putative uncharacterized protein	N	N	0.57
LOC_Os07g47630	MGG_10328	RNA recognition motif containing protein	Allantoate permease	N	N	0.65
LOC_Os09g03610	MGG_10328	flowering time control protein FCA	Allantoate permease	N	N	0.72
LOC_Os03g04340	MGG_10333	C-methyltransferase	Class III chitinase	N	N	0.63
LOC_Os03g13614	MGG_10333	transcription factor	Class III chitinase	N	N	0.58
LOC_Os08g43600	MGG_10333	bZIP transcription factor domain containing protein	Class III chitinase	N	N	0.57
LOC_Os02g09310	MGG_10356	cytochrome P450	Putative uncharacterized protein	Y	N	0.53
LOC_Os10g37034	MGG_10356	cytochrome P450	Putative uncharacterized protein	Y	N	0.51
LOC_Os01g07376	MGG_10371	thioredoxin	Glutaredoxin-C4	N	N	0.56
LOC_Os02g42700	MGG_10371	thioredoxin	Glutaredoxin-C4	N	N	0.51
LOC_Os10g35720	MGG_10371	OsGrx_S17 - glutaredoxin subgroup II	Glutaredoxin-C4	Y	N	0.65
LOC_Os02g11760	MGG_10410	pleiotropic drug resistance protein	Pleiotropic drug resistance protein 1	Y	N	0.64
LOC_Os02g39700	MGG_10410	RNA binding protein	Pleiotropic drug resistance protein 1	N	N	0.69
LOC_Os03g17350	MGG_10410	white-brown complex homolog protein	Pleiotropic drug resistance protein 1	Y	N	0.56
LOC_Os03g54790	MGG_10410	ABC transporter, ATP-binding protein	Pleiotropic drug resistance protein 1	Y	N	0.54
LOC_Os06g30460	MGG_10410	2-oxo acid dehydrogenases acyltransferase domain containing protein	Pleiotropic drug resistance protein 1	N	N	0.63
LOC_Os03g03680	MGG_10439	transporter family protein	MFS transporter	N	N	0.66
LOC_Os01g70780	MGG_10445	WD40-like domain containing protein	Thermostable alkaline protease	N	N	0.59
LOC_Os02g19210	MGG_10445	WD repeat-containing protein	Thermostable alkaline protease	N	N	0.57
LOC_Os02g33630	MGG_10445	WD domain, G-beta repeat domain containing protein	Thermostable alkaline protease	N	N	0.52
LOC_Os03g21990	MGG_10445	WD domain, G-beta repeat domain containing protein	Thermostable alkaline protease	N	N	0.6
LOC_Os03g47780	MGG_10445	WD repeat-containing protein	Thermostable alkaline protease	N	N	0.52
LOC_Os05g46570	MGG_10445	WD domain, G-beta repeat domain containing protein	Thermostable alkaline protease	N	N	0.64
LOC_Os06g39760	MGG_10445	WD domain, G-beta repeat domain containing protein	Thermostable alkaline protease	N	N	0.7
LOC_Os07g40030	MGG_10445	WD domain, G-beta repeat domain containing protein	Thermostable alkaline protease	N	N	0.56
LOC_Os11g43890	MGG_10445	WD domain, G-beta repeat domain containing protein	Thermostable alkaline protease	N	N	0.58
LOC_Os02g17150	MGG_10449	OsSub18 - Putative Subtilisin homologue	Proteinase T	Y	N	0.57
LOC_Os05g25630	MGG_10449	inhibitor I family protein	Proteinase T	Y	N	0.56
LOC_Os12g36210	MGG_10449	inhibitor I family protein	Proteinase T	Y	N	0.54
LOC_Os12g36240	MGG_10449	inhibitor I family protein	Proteinase T	Y	N	0.52
LOC_Os01g04990	MGG_10492	mitochondrial carrier protein	Carnitine/acyl carnitine carrier	Y	N	0.61
LOC_Os01g22600	MGG_10492	mitochondrial carrier protein	Carnitine/acyl carnitine carrier	Y	N	0.58
LOC_Os01g32980	MGG_10492	mitochondrial carrier protein	Carnitine/acyl carnitine carrier	Y	N	0.59
LOC_Os01g70800	MGG_10492	mitochondrial carrier protein	Carnitine/acyl carnitine carrier	Y	N	0.57
LOC_Os01g73420	MGG_10492	mitochondrial carrier protein	Carnitine/acyl carnitine carrier	Y	N	0.57
LOC_Os02g10800	MGG_10492	mitochondrial carrier protein	Carnitine/acyl carnitine carrier	Y	N	0.56
LOC_Os02g44570	MGG_10492	mitochondrial carrier protein	Carnitine/acyl carnitine carrier	Y	N	0.54
LOC_Os03g09110	MGG_10492	mitochondrial carrier protein	Carnitine/acyl carnitine carrier	Y	N	0.55
LOC_Os03g15690	MGG_10492	phosphate carrier protein, mitochondrial precursor	Carnitine/acyl carnitine carrier	Y	N	0.59
LOC_Os03g15860	MGG_10492	mitochondrial carrier protein	Carnitine/acyl carnitine carrier	Y	N	0.61
LOC_Os05g07900	MGG_10492	mitochondrial carrier protein	Carnitine/acyl carnitine carrier	Y	N	0.59
LOC_Os05g23720	MGG_10492	mitochondrial carrier protein	Carnitine/acyl carnitine carrier	Y	N	0.59
LOC_Os06g40050	MGG_10492	mitochondrial carrier protein	Carnitine/acyl carnitine carrier	Y	N	0.6
LOC_Os08g40850	MGG_10492	mitochondrial carrier protein	Carnitine/acyl carnitine carrier	Y	N	0.56
LOC_Os09g32200	MGG_10492	mitochondrial carrier protein	Carnitine/acyl carnitine carrier	Y	N	0.58
LOC_Os09g33470	MGG_10492	mitochondrial carrier protein	Carnitine/acyl carnitine carrier	Y	N	0.55
LOC_Os09g38100	MGG_10492	phosphate carrier protein, mitochondrial precursor	Carnitine/acyl carnitine carrier	Y	N	0.52
LOC_Os10g25830	MGG_10492	mitochondrial carrier protein	Carnitine/acyl carnitine carrier	Y	N	0.56
LOC_Os11g43960	MGG_10492	mitochondrial carrier protein	Carnitine/acyl carnitine carrier	Y	N	0.6
LOC_Os02g11750	MGG_10563	RNA recognition motif containing protein	Efflux pump; Efflux pump, variant	N	N	0.6
LOC_Os04g53440	MGG_10563	RNA recognition motif containing protein	Efflux pump; Efflux pump, variant	N	N	0.53
LOC_Os03g47620	MGG_10748	ankyrin	Putative uncharacterized protein	N	N	0.72
LOC_Os02g02320	MGG_10878	OsSCP6 - Putative Serine Carboxypeptidase homologue	Galactose oxidase	N	N	0.54
LOC_Os02g20590	MGG_10878	MBTB1 - Bric-a-Brac, Tramtrack, Broad Complex BTB domain with Meprin and TRAF Homology MATH domain	Galactose oxidase	N	N	0.66
LOC_Os02g20720	MGG_10878	MBTB2 - Bric-a-Brac, Tramtrack, Broad Complex BTB domain with Meprin and TRAF Homology MATH domain	Galactose oxidase	N	N	0.7
LOC_Os12g37970	MGG_10878	MYB family transcription factor	Galactose oxidase	N	N	0.53
LOC_Os09g27900	MGG_10881	plastidic glucose transporter 1	Putative uncharacterized protein	N	N	0.52
LOC_Os10g40950	MGG_10893	polyol transporter 5	Putative uncharacterized protein	N	N	0.513333
LOC_Os03g21020	MGG_10938	RNA recognition motif containing protein	Phthalate transporter	N	N	0.51
LOC_Os03g52090	MGG_10941	calcium-transporting ATPase 3, endoplasmic reticulum-type	Cation-transporting ATPase pacS	Y	N	0.53
LOC_Os04g51970	MGG_11132	synaptic vesicle 2-related protein	Putative uncharacterized protein	N	N	0.69
LOC_Os05g04850	MGG_11132	RNA recognition motif containing protein	Putative uncharacterized protein	N	N	0.54
LOC_Os05g08490	MGG_11211	cytokinin-O-glucosyltransferase 1	GRAM domain-containing protein YSP2	N	N	0.51
LOC_Os05g45920	MGG_11211	S1 RNA binding domain containing protein	GRAM domain-containing protein YSP2	N	N	0.64
LOC_Os10g40950	MGG_11530	polyol transporter 5	Putative uncharacterized protein	N	N	0.583333
LOC_Os02g11760	MGG_11754	pleiotropic drug resistance protein	SMDR1	Y	N	0.55
LOC_Os03g64200	MGG_11754	ABC-2 type transporter	SMDR1	Y	N	0.54
LOC_Os06g51460	MGG_11754	white-brown complex homolog protein	SMDR1	Y	N	0.54
LOC_Os08g43120	MGG_11754	Plant PDR ABC transporter associated domain containing protein	SMDR1	Y	N	0.51
LOC_Os09g16290	MGG_11754	ABC-2 type transporter	SMDR1	Y	N	0.54
LOC_Os09g16449	MGG_11754	pleiotropic drug resistance protein 4	SMDR1	Y	N	0.59
LOC_Os09g29670	MGG_11754	white-brown complex homolog protein 11	SMDR1	Y	N	0.59
LOC_Os10g30610	MGG_11754	white-brown complex homolog protein	SMDR1	Y	N	0.52
LOC_Os10g35180	MGG_11754	white-brown complex homolog protein 11	SMDR1	Y	N	0.53
LOC_Os11g22350	MGG_11754	white-brown complex homolog protein	SMDR1	Y	N	0.52
LOC_Os11g37700	MGG_11754	pleiotropic drug resistance protein	SMDR1	Y	N	0.56
LOC_Os12g31800	MGG_11754	glycine-rich RNA-binding protein 7	SMDR1	N	N	0.54
LOC_Os02g13560	MGG_11820	transporter family protein	Putative uncharacterized protein	N	N	0.57
LOC_Os06g41770	MGG_12116	bZIP transcription factor domain containing protein	Putative uncharacterized protein	N	N	0.555
LOC_Os08g36790	MGG_12116	bZIP transcription factor	Putative uncharacterized protein	N	N	0.52
LOC_Os11g24780	MGG_12116	expressed protein	Putative uncharacterized protein	N	N	0.63
LOC_Os04g52890	MGG_12163	ATBAG1	Putative uncharacterized protein	N	N	0.56
LOC_Os06g03640	MGG_12163	BAG domain containing protein	Putative uncharacterized protein	N	N	0.61
LOC_Os08g43270	MGG_12163	BAG domain-containing protein	Putative uncharacterized protein	N	N	0.62
LOC_Os09g31019	MGG_12163	ubiquitin fusion protein	Putative uncharacterized protein	N	N	0.53
LOC_Os09g31031	MGG_12163	ubiquitin family protein	Putative uncharacterized protein	N	N	0.52
LOC_Os09g35630	MGG_12163	BAG domain-containing protein	Putative uncharacterized protein	N	N	0.61
LOC_Os11g18670	MGG_12163	ubiquitin family protein	Putative uncharacterized protein	N	N	0.53
LOC_Os01g02720	MGG_12184	elongation factor Tu	Putative uncharacterized protein	N	N	0.518333
LOC_Os02g10480	MGG_12184	stromal membrane-associated protein	Putative uncharacterized protein	Y	N	0.53
LOC_Os02g39280	MGG_12184	C2 domain containing protein	Putative uncharacterized protein	Y	N	0.52
LOC_Os02g53040	MGG_12184	STE_MEKK_ste11_MAP3K.11 - STE kinases include homologs to sterile 7, sterile 11 and sterile 20 from yeast	Putative uncharacterized protein	N	N	0.59
LOC_Os03g05660	MGG_12184	appr-1-p processing enzyme family protein	Putative uncharacterized protein	N	N	0.54
LOC_Os03g21830	MGG_12184	appr-1-p processing enzyme family protein	Putative uncharacterized protein	N	N	0.52
LOC_Os03g43360	MGG_12184	zinc finger, C3HC4 type domain containing protein	Putative uncharacterized protein	N	N	0.51
LOC_Os04g20220	MGG_12184	elongation factor Tu	Putative uncharacterized protein	N	N	0.683333
LOC_Os04g50870	MGG_12184	elongation factor Tu	Putative uncharacterized protein	N	N	0.548333
LOC_Os04g58140	MGG_12184	elongation factor Tu	Putative uncharacterized protein	N	N	0.51
LOC_Os06g07830	MGG_12184	ANTH/ENTH domain containing protein	Putative uncharacterized protein	N	N	0.55
LOC_Os06g40704	MGG_12184	stromal membrane-associated protein	Putative uncharacterized protein	Y	N	0.53
LOC_Os07g39620	MGG_12184	C2 domain containing protein	Putative uncharacterized protein	Y	N	0.61
LOC_Os09g07800	MGG_12184	expressed protein	Putative uncharacterized protein	Y	N	0.52
LOC_Os11g17440	MGG_12184	enoyl-CoA hydratase/isomerase family protein	Putative uncharacterized protein	N	N	0.51
LOC_Os03g24070	MGG_12304	rhythmically expressed gene 2 protein	Putative uncharacterized protein	Y	N	0.8
LOC_Os02g29130	MGG_12441	ankyrin	Putative uncharacterized protein	N	N	0.87
LOC_Os02g29190	MGG_12441	ankyrin	Putative uncharacterized protein	N	N	0.65
LOC_Os03g47720	MGG_12441	ankyrin	Putative uncharacterized protein	N	N	0.56
LOC_Os04g41280	MGG_12441	ankyrin repeat domain containing protein	Putative uncharacterized protein	N	N	0.59
LOC_Os07g30774	MGG_12441	calmodulin-binding transcription activator 5	Putative uncharacterized protein	N	N	0.84
LOC_Os07g43030	MGG_12441	calmodulin-binding transcription activator	Putative uncharacterized protein	N	N	0.75
LOC_Os07g08340	MGG_12595	pyruvate kinase	Alpha-amylase	N	N	0.57
LOC_Os11g41640	MGG_12595	helix-loop-helix DNA-binding domain containing protein	Alpha-amylase	N	N	0.59
LOC_Os11g41890	MGG_12595	RNA recognition motif containing protein	Alpha-amylase	N	N	0.63
LOC_Os09g03610	MGG_12612	flowering time control protein FCA	Drug resistance transporter	N	N	0.64
LOC_Os08g21570	MGG_12614	25.3 kDa vesicle transport protein	Putative uncharacterized protein	N	N	0.515
LOC_Os02g42590	MGG_12647	WD-40 repeat family protein	Ser/Thr protein phosphatase family protein	N	N	0.56
LOC_Os05g03860	MGG_12647	CPuORF3 - conserved peptide uORF-containing transcript	Ser/Thr protein phosphatase family protein	N	N	0.528833
LOC_Os05g03865	MGG_12647	expressed protein	Ser/Thr protein phosphatase family protein	N	N	0.528833
LOC_Os09g10840	MGG_12647	transcription factor	Ser/Thr protein phosphatase family protein	N	N	0.57
LOC_Os10g38820	MGG_12647	bZIP family transcription factor	Ser/Thr protein phosphatase family protein	N	N	0.52
LOC_Os03g47650	MGG_12752	ankyrin	Epidermal retinal dehydrogenase 2	N	N	0.64
LOC_Os09g15370	MGG_12752	expressed protein	Epidermal retinal dehydrogenase 2	N	N	0.626667
LOC_Os03g03680	MGG_12817	transporter family protein	Fluconazole resistance protein 1	N	N	0.61
LOC_Os05g44530	MGG_12939	BTB3 - Bric-a-Brac, Tramtrack, Broad Complex BTB domain	Putative uncharacterized protein	N	N	0.62
LOC_Os10g29190	MGG_12939	BTB/POZ domain containing protein	Putative uncharacterized protein	N	N	0.78
LOC_Os03g22380	MGG_13286	RNA recognition motif containing protein	Putative uncharacterized protein	N	N	0.52
LOC_Os11g28610	MGG_13286	transporter family protein	Putative uncharacterized protein	N	N	0.53
LOC_Os02g31290	MGG_13328	AML1	RING finger membrane protein	N	N	0.55
LOC_Os09g03610	MGG_13328	flowering time control protein FCA	RING finger membrane protein	N	N	0.53
LOC_Os03g21020	MGG_13442	RNA recognition motif containing protein	Nicotinamide mononucleotide permease	N	N	0.69
LOC_Os01g22390	MGG_13508	WD domain containing protein	Ubiquitin-protein ligase Sel1/Ubx2	N	N	0.57
LOC_Os02g11930	MGG_13508	receptor-like protein kinase precursor	Ubiquitin-protein ligase Sel1/Ubx2	N	N	0.52
LOC_Os02g13580	MGG_13508	kinesin motor domain containing protein	Ubiquitin-protein ligase Sel1/Ubx2	N	N	0.55
LOC_Os03g05140	MGG_13508	receptor-like protein kinase 2 precursor	Ubiquitin-protein ligase Sel1/Ubx2	N	N	0.54
LOC_Os03g18360	MGG_13508	BTBT1 - Bric-a-Brac, Tramtrack, Broad Complex BTB domain with tetratricopeptide repeats	Ubiquitin-protein ligase Sel1/Ubx2	N	N	0.51
LOC_Os03g54900	MGG_13508	phytosulfokine receptor precursor	Ubiquitin-protein ligase Sel1/Ubx2	N	N	0.52
LOC_Os04g52780	MGG_13508	leucine-rich repeat receptor protein kinase EXS precursor	Ubiquitin-protein ligase Sel1/Ubx2	N	N	0.54
LOC_Os05g40270	MGG_13508	expressed protein	Ubiquitin-protein ligase Sel1/Ubx2	N	N	0.55
LOC_Os06g02555	MGG_13508	expressed protein	Ubiquitin-protein ligase Sel1/Ubx2	N	N	0.61
LOC_Os06g03970	MGG_13508	receptor-like protein kinase 5 precursor	Ubiquitin-protein ligase Sel1/Ubx2	N	N	0.62
LOC_Os06g45630	MGG_13508	expressed protein	Ubiquitin-protein ligase Sel1/Ubx2	N	N	0.55
LOC_Os10g06760	MGG_13508	receptor-like protein kinase precursor	Ubiquitin-protein ligase Sel1/Ubx2	N	N	0.54
LOC_Os10g18990	MGG_13508	receptor kinase 2	Ubiquitin-protein ligase Sel1/Ubx2	N	N	0.56
LOC_Os10g21800	MGG_13508	leucine-rich repeat family protein	Ubiquitin-protein ligase Sel1/Ubx2	N	N	0.67
LOC_Os10g33040	MGG_13508	receptor-like protein kinase precursor	Ubiquitin-protein ligase Sel1/Ubx2	N	N	0.51
LOC_Os11g07250	MGG_13508	receptor kinase	Ubiquitin-protein ligase Sel1/Ubx2	N	N	0.51
LOC_Os11g40890	MGG_13508	expressed protein	Ubiquitin-protein ligase Sel1/Ubx2	N	N	0.56
LOC_Os07g18050	MGG_13578	RNA-binding motif protein	Sulphydryl oxidase	N	N	0.6
LOC_Os01g72340	MGG_13610	beta-galactosidase	Hydrolase	Y	N	0.59
LOC_Os04g39250	MGG_13624	RNA recognition motif family protein	ABC transporter CDR4	N	N	0.62
LOC_Os06g11730	MGG_13624	RNA recognition motif containing protein	ABC transporter CDR4	N	N	0.57
LOC_Os08g04840	MGG_13624	MYB family transcription factor	ABC transporter CDR4	N	N	0.52
LOC_Os09g10930	MGG_13624	gamma response I protein	ABC transporter CDR4	N	N	0.53
LOC_Os09g12800	MGG_13624	zinc finger Ran-binding domain-containing protein 2	ABC transporter CDR4	N	N	0.66
LOC_Os01g74470	MGG_13762	ABC transporter, ATP-binding protein	Multidrug resistance protein 3	Y	N	0.54
LOC_Os02g16680	MGG_13762	bZIP transcription factor domain containing protein	Multidrug resistance protein 3	N	N	0.56
LOC_Os04g33700	MGG_13762	ABC transmembrane transporter domain containing protein	Multidrug resistance protein 3	Y	N	0.62
LOC_Os07g28090	MGG_13762	ABC transporter, ATP-binding protein	Multidrug resistance protein 3	Y	N	0.56
LOC_Os07g33330	MGG_13762	RNA recognition motif containing protein	Multidrug resistance protein 3	N	N	0.52
LOC_Os08g15080	MGG_13762	proline rich protein 3	Multidrug resistance protein 3	N	N	0.506833
LOC_Os10g08570	MGG_13762	RNA recognition motif family protein	Multidrug resistance protein 3	N	N	0.500167
LOC_Os04g51970	MGG_13793	synaptic vesicle 2-related protein	Nitrate transporter	N	N	0.62
LOC_Os01g10660	MGG_13815	expressed protein	Putative uncharacterized protein	N	N	0.53
LOC_Os02g06640	MGG_13815	ubiquitin family protein	Putative uncharacterized protein	N	N	0.55
LOC_Os02g10140	MGG_13815	bZIP transcription factor domain containing protein	Putative uncharacterized protein	N	N	0.51
LOC_Os06g46770	MGG_13815	ubiquitin family protein	Putative uncharacterized protein	N	N	0.55
LOC_Os08g07970	MGG_13815	transcription factor	Putative uncharacterized protein	N	N	0.56
LOC_Os08g08790	MGG_13815	ubiquitin family protein	Putative uncharacterized protein	N	N	0.51
LOC_Os12g34108	MGG_13815	ATP synthase protein 9, mitochondrial	Putative uncharacterized protein	Y	N	0.64
LOC_Os01g35030	MGG_13880	MDR-like ABC transporter	ATP-binding cassette	Y	N	0.62
LOC_Os01g50080	MGG_13880	MDR-like ABC transporter	ATP-binding cassette	Y	N	0.57
LOC_Os01g50160	MGG_13880	MDR-like ABC transporter	ATP-binding cassette	Y	N	0.56
LOC_Os03g04920	MGG_13880	multidrug resistance-associated protein	ATP-binding cassette	Y	N	0.53
LOC_Os03g17180	MGG_13880	ABC transporter, ATP-binding protein	ATP-binding cassette	Y	N	0.66
LOC_Os04g13220	MGG_13880	ABC transporter family protein	ATP-binding cassette	Y	N	0.61
LOC_Os04g49890	MGG_13880	multidrug resistance-associated protein	ATP-binding cassette	Y	N	0.57
LOC_Os04g49900	MGG_13880	ABC transporter family protein	ATP-binding cassette	Y	N	0.52
LOC_Os04g52900	MGG_13880	ABC transporter family protein	ATP-binding cassette	Y	N	0.56
LOC_Os06g06440	MGG_13880	ABC transporter, ATP-binding protein	ATP-binding cassette	Y	N	0.53
LOC_Os12g38800	MGG_13880	RNA recognition motif containing protein	ATP-binding cassette	N	N	0.52
LOC_Os03g23935	MGG_13977	WD domain, G-beta repeat domain containing protein	Alkaline proteinase	N	N	0.55
LOC_Os11g03990	MGG_13977	WD domain, G-beta repeat domain containing protein	Alkaline proteinase	N	N	0.51
LOC_Os12g42150	MGG_13977	WD domain, G-beta repeat domain containing protein	Alkaline proteinase	N	N	0.62
LOC_Os01g05490	MGG_14003	triosephosphate isomerase, cytosolic	Ankyrin repeat protein	N	N	0.56
LOC_Os01g68060	MGG_14003	copine	Ankyrin repeat protein	N	N	0.6
LOC_Os02g17730	MGG_14003	BAM2	Ankyrin repeat protein	N	N	0.55
LOC_Os02g38050	MGG_14003	joka2	Ankyrin repeat protein	N	N	0.72
LOC_Os03g47620	MGG_14003	ankyrin	Ankyrin repeat protein	Y	N	0.51
LOC_Os04g39650	MGG_14003	receptor protein kinase CLAVATA1 precursor	Ankyrin repeat protein	N	N	0.52
LOC_Os06g09890	MGG_14003	smr domain containing protein	Ankyrin repeat protein	N	N	0.59
LOC_Os07g43030	MGG_14003	calmodulin-binding transcription activator	Ankyrin repeat protein	Y	N	0.52
LOC_Os08g04130	MGG_14003	copine-6	Ankyrin repeat protein	N	N	0.6
LOC_Os08g38600	MGG_14003	copine	Ankyrin repeat protein	N	N	0.59
LOC_Os08g40090	MGG_14003	leucine rich repeat containing protein	Ankyrin repeat protein	N	N	0.58
LOC_Os09g36450	MGG_14003	triosephosphate isomerase, chloroplast precursor	Ankyrin repeat protein	N	N	0.56
LOC_Os10g33060	MGG_14003	hcr2-5D	Ankyrin repeat protein	N	N	0.51
LOC_Os11g44990	MGG_14003	NB-ARC domain containing protein	Ankyrin repeat protein	N	N	0.65
LOC_Os03g06139	MGG_14069	ABC-2 type transporter domain containing protein	Heavy metal tolerance protein	Y	N	0.61
LOC_Os05g31910	MGG_14069	white-brown complex homolog protein 16	Heavy metal tolerance protein	Y	N	0.61
LOC_Os12g13720	MGG_14069	Plant PDR ABC transporter associated domain containing protein	Heavy metal tolerance protein	Y	N	0.53
LOC_Os12g22284	MGG_14069	white-brown complex homolog protein 11	Heavy metal tolerance protein	Y	N	0.52
LOC_Os01g69970	MGG_14134	WD domain, G-beta repeat domain containing protein	Putative uncharacterized protein	N	N	0.52
LOC_Os06g04040	MGG_14291	WD domain, G-beta repeat domain containing protein	Beta-lactamase	N	N	0.68
LOC_Os08g21660	MGG_14291	WD domain, G-beta repeat domain containing protein	Beta-lactamase	N	N	0.51
LOC_Os12g03822	MGG_14291	WD domain, G-beta repeat domain containing protein	Beta-lactamase	N	N	0.6
LOC_Os01g07640	MGG_14330	ankyrin	Putative uncharacterized protein	N	N	0.51
LOC_Os01g74320	MGG_14330	ubiquitin ligase	Putative uncharacterized protein	N	N	0.55
LOC_Os02g29110	MGG_14330	ankyrin repeat family protein	Putative uncharacterized protein	N	N	0.67
LOC_Os03g17240	MGG_14330	ankyrin repeat-containing protein	Putative uncharacterized protein	N	N	0.51
LOC_Os06g43680	MGG_14330	palmitoyltransferase TIP1	Putative uncharacterized protein	N	N	0.69
LOC_Os07g34390	MGG_14330	ankyrin repeat family protein	Putative uncharacterized protein	N	N	0.56
LOC_Os09g03680	MGG_14330	ankyrin	Putative uncharacterized protein	N	N	0.53
LOC_Os11g14520	MGG_14330	expressed protein	Putative uncharacterized protein	N	N	0.64
LOC_Os12g40770	MGG_14330	ankyrin-1	Putative uncharacterized protein	N	N	0.55
LOC_Os04g33700	MGG_14400	ABC transmembrane transporter domain containing protein	P-glycoprotein 5	Y	N	0.53
LOC_Os12g17840	MGG_14547	ubiquitin family protein	Putative uncharacterized protein	N	N	0.54
LOC_Os05g13650	MGG_14548	RNA recognition motif containing protein	Integral membrane protein	N	N	0.53
LOC_Os06g07350	MGG_14548	RNA-binding motif protein	Integral membrane protein	N	N	0.55
LOC_Os07g47630	MGG_14548	RNA recognition motif containing protein	Integral membrane protein	N	N	0.54
LOC_Os09g35850	MGG_14548	RNA recognition motif containing protein	Integral membrane protein	N	N	0.51
LOC_Os12g43600	MGG_14548	RNA recognition motif containing protein	Integral membrane protein	N	N	0.61
LOC_Os01g02750	MGG_14768	protein kinase domain containing protein	Putative uncharacterized protein	N	N	0.54
LOC_Os01g02760	MGG_14768	receptor-like kinase	Putative uncharacterized protein	N	N	0.69
LOC_Os01g04520	MGG_14768	Ser/Thr protein kinase	Putative uncharacterized protein	N	N	0.56
LOC_Os01g04550	MGG_14768	expressed protein	Putative uncharacterized protein	N	N	0.59
LOC_Os01g04580	MGG_14768	Ser/Thr protein kinase	Putative uncharacterized protein	N	N	0.78
LOC_Os01g09252	MGG_14768	WD domain, G-beta repeat domain containing protein	Putative uncharacterized protein	N	N	0.67
LOC_Os01g10790	MGG_14768	WD domain, G-beta repeat domain containing protein	Putative uncharacterized protein	N	N	0.92
LOC_Os01g10890	MGG_14768	CAMK_KIN1/SNF1/Nim1_like.8 - CAMK includes calcium/calmodulin depedent protein kinases	Putative uncharacterized protein	N	N	0.52
LOC_Os01g18800	MGG_14768	CAMK_KIN1/SNF1/Nim1_like.9 - CAMK includes calcium/calmodulin depedent protein kinases	Putative uncharacterized protein	N	N	0.7
LOC_Os01g36550	MGG_14768	protein kinase family protein	Putative uncharacterized protein	N	N	0.73
LOC_Os01g41630	MGG_14768	serine/threonine protein phosphatase 2A 55 kDa regulatory subunit B	Putative uncharacterized protein	N	N	0.735
LOC_Os01g55440	MGG_14768	CAMK_KIN1/SNF1/Nim1_like.1 - CAMK includes calcium/calmodulin depedent protein kinases	Putative uncharacterized protein	N	N	0.53
LOC_Os01g60910	MGG_14768	CAMK_KIN1/SNF1/Nim1_like.12 - CAMK includes calcium/calmodulin depedent protein kinases	Putative uncharacterized protein	N	N	0.57
LOC_Os02g02870	MGG_14768	glycine-rich protein 2	Putative uncharacterized protein	N	N	0.59
LOC_Os02g06570	MGG_14768	CAMK_KIN1/SNF1/Nim1_like.13 - CAMK includes calcium/calmodulin depedent protein kinases	Putative uncharacterized protein	N	N	0.82
LOC_Os02g08140	MGG_14768	CAMK_KIN1/SNF1/Nim1_like.14 - CAMK includes calcium/calmodulin depedent protein kinases	Putative uncharacterized protein	N	N	0.59
LOC_Os02g20620	MGG_14768	speckle-type POZ protein	Putative uncharacterized protein	N	N	0.57
LOC_Os02g39700	MGG_14768	RNA binding protein	Putative uncharacterized protein	N	N	0.51
LOC_Os03g03510	MGG_14768	CAMK_KIN1/SNF1/Nim1_like.15 - CAMK includes calcium/calmodulin depedent protein kinases	Putative uncharacterized protein	N	N	0.56
LOC_Os03g03570	MGG_14768	leucine-rich repeat transmembrane protein kinase	Putative uncharacterized protein	N	N	0.52
LOC_Os03g03890	MGG_14768	protein kinase family protein	Putative uncharacterized protein	N	N	0.7
LOC_Os03g16740	MGG_14768	protein kinase APK1A, chloroplast precursor	Putative uncharacterized protein	N	N	0.54
LOC_Os03g20380	MGG_14768	CAMK_KIN1/SNF1/Nim1_like.2 - CAMK includes calcium/calmodulin depedent protein kinases	Putative uncharacterized protein	N	N	0.75
LOC_Os04g12580	MGG_14768	receptor-like protein kinase	Putative uncharacterized protein	N	N	0.51
LOC_Os04g38910	MGG_14768	atypical receptor-like kinase MARK	Putative uncharacterized protein	N	N	0.6
LOC_Os04g39910	MGG_14768	receptor-like protein kinase	Putative uncharacterized protein	N	N	0.84
LOC_Os04g52606	MGG_14768	SHR5-receptor-like kinase	Putative uncharacterized protein	N	N	0.6
LOC_Os05g04550	MGG_14768	CAMK_KIN1/SNF1/Nim1_like.3 - CAMK includes calcium/calmodulin depedent protein kinases	Putative uncharacterized protein	N	N	0.82
LOC_Os05g07300	MGG_14768	serine/threonine-protein kinase receptor precursor	Putative uncharacterized protein	N	N	0.63
LOC_Os05g39870	MGG_14768	CAMK_KIN1/SNF1/Nim1_like.24 - CAMK includes calcium/calmodulin depedent protein kinases	Putative uncharacterized protein	N	N	0.8
LOC_Os05g43840	MGG_14768	CAMK_KIN1/SNF1/Nim1_like.25 - CAMK includes calcium/calmodulin depedent protein kinases	Putative uncharacterized protein	N	N	0.81
LOC_Os06g04040	MGG_14768	WD domain, G-beta repeat domain containing protein	Putative uncharacterized protein	N	N	0.83
LOC_Os06g04880	MGG_14768	serine threonine kinase	Putative uncharacterized protein	N	N	0.65
LOC_Os06g07540	MGG_14768	WD-40 repeat family protein	Putative uncharacterized protein	N	N	0.52
LOC_Os06g36770	MGG_14768	serine/threonine protein phosphatase 2A 55 kDa regulatory subunit B	Putative uncharacterized protein	N	N	0.705
LOC_Os06g45280	MGG_14768	protein kinase APK1B, chloroplast precursor	Putative uncharacterized protein	N	N	0.51
LOC_Os06g46475	MGG_14768	WD domain, G-beta repeat domain containing protein	Putative uncharacterized protein	N	N	0.72
LOC_Os06g50100	MGG_14768	tyrosine protein kinase domain containing protein	Putative uncharacterized protein	N	N	0.62
LOC_Os07g03780	MGG_14768	lectin-like receptor kinase	Putative uncharacterized protein	N	N	0.53
LOC_Os07g03860	MGG_14768	lectin-like receptor kinase 7	Putative uncharacterized protein	N	N	0.52
LOC_Os07g03930	MGG_14768	lectin-like receptor kinase	Putative uncharacterized protein	N	N	0.52
LOC_Os07g03970	MGG_14768	lectin-like receptor kinase 7	Putative uncharacterized protein	N	N	0.58
LOC_Os07g04000	MGG_14768	lectin-like receptor kinase	Putative uncharacterized protein	N	N	0.54
LOC_Os07g04040	MGG_14768	expressed protein	Putative uncharacterized protein	N	N	0.6
LOC_Os07g05620	MGG_14768	CAMK_KIN1/SNF1/Nim1_like.28 - CAMK includes calcium/calmodulin depedent protein kinases	Putative uncharacterized protein	N	N	0.58
LOC_Os07g38810	MGG_14768	lectin receptor-type protein kinase	Putative uncharacterized protein	N	N	0.52
LOC_Os07g41190	MGG_14768	WD domain, G-beta repeat domain containing protein	Putative uncharacterized protein	N	N	0.54
LOC_Os07g42180	MGG_14768	exportin 1	Putative uncharacterized protein	N	N	0.54
LOC_Os07g48760	MGG_14768	CAMK_KIN1/SNF1/Nim1_like.32 - CAMK includes calcium/calmodulin depedent protein kinases	Putative uncharacterized protein	N	N	0.8
LOC_Os08g02050	MGG_14768	protein kinase family protein	Putative uncharacterized protein	N	N	0.63
LOC_Os08g03170	MGG_14768	lectin-like receptor kinase 1	Putative uncharacterized protein	N	N	0.54
LOC_Os09g12550	MGG_14768	WD domain, G-beta repeat domain containing protein	Putative uncharacterized protein	N	N	0.62
LOC_Os09g25100	MGG_14768	CAMK_KIN1/SNF1/Nim1_like.35 - CAMK includes calcium/calmodulin depedent protein kinases	Putative uncharacterized protein	N	N	0.51
LOC_Os10g28820	MGG_14768	MBTB38 - Bric-a-Brac, Tramtrack, Broad Complex BTB domain with Meprin and TRAF Homology MATH domain	Putative uncharacterized protein	N	N	0.61
LOC_Os10g29020	MGG_14768	ATBPM2	Putative uncharacterized protein	N	N	0.53
LOC_Os10g29920	MGG_14768	snRNP protein	Putative uncharacterized protein	N	N	0.57
LOC_Os11g02240	MGG_14768	CAMK_KIN1/SNF1/Nim1_like.4 - CAMK includes calcium/calmodulin depedent protein kinases	Putative uncharacterized protein	N	N	0.78
LOC_Os11g03970	MGG_14768	CAMK_KIN1/SNF1/Nim1_like.5 - CAMK includes calcium/calmodulin depedent protein kinases	Putative uncharacterized protein	N	N	0.82
LOC_Os11g08090	MGG_14768	expressed protein	Putative uncharacterized protein	N	N	0.78
LOC_Os11g40220	MGG_14768	MBTB62 - Bric-a-Brac, Tramtrack, Broad Complex BTB domain with Meprin and TRAF Homology MATH domain	Putative uncharacterized protein	N	N	0.52
LOC_Os12g34320	MGG_14768	S-locus-like receptor protein kinase	Putative uncharacterized protein	N	N	0.55
LOC_Os12g42150	MGG_14768	WD domain, G-beta repeat domain containing protein	Putative uncharacterized protein	N	N	0.685
LOC_Os02g11930	MGG_14775	receptor-like protein kinase precursor	Putative uncharacterized protein	N	N	0.61
LOC_Os02g11960	MGG_14775	ABC transporter, ATP-binding protein	Putative uncharacterized protein	N	N	0.51
LOC_Os02g12340	MGG_14775	conserved hypothetical protein	Putative uncharacterized protein	N	N	0.66
LOC_Os02g12400	MGG_14775	receptor-like protein kinase precursor	Putative uncharacterized protein	N	N	0.65
LOC_Os02g16680	MGG_14775	bZIP transcription factor domain containing protein	Putative uncharacterized protein	N	N	0.74
LOC_Os03g15950	MGG_14775	enolase	Putative uncharacterized protein	N	N	0.65
LOC_Os03g51200	MGG_14775	Core histone H2A/H2B/H3/H4 domain containing protein	Putative uncharacterized protein	N	N	0.52
LOC_Os03g53190	MGG_14775	Core histone H2A/H2B/H3/H4 domain containing protein	Putative uncharacterized protein	N	N	0.543333
LOC_Os04g21790	MGG_14775	OsWAK34 - OsWAK receptor-like protein kinase	Putative uncharacterized protein	N	N	0.566667
LOC_Os04g23890	MGG_14775	AGC_PVPK_like_kin82y.10 - ACG kinases include homologs to PKA, PKG and PKC	Putative uncharacterized protein	N	N	0.62
LOC_Os04g58750	MGG_14775	protein kinase family protein	Putative uncharacterized protein	N	N	0.54
LOC_Os05g37170	MGG_14775	transcription factor	Putative uncharacterized protein	N	N	0.57
LOC_Os08g40740	MGG_14775	glycosyl hydrolase	Putative uncharacterized protein	N	N	0.555
LOC_Os09g20820	MGG_14775	enolase	Putative uncharacterized protein	N	N	0.81
LOC_Os12g34510	MGG_14775	Core histone H2A/H2B/H3/H4 domain containing protein	Putative uncharacterized protein	N	N	0.623333
LOC_Os09g31390	MGG_14778	transcription factor	Leptomycin B resistance protein pmd1	N	N	0.54
LOC_Os12g37580	MGG_14778	ABC transporter, ATP-binding protein	Leptomycin B resistance protein pmd1	Y	N	0.52
LOC_Os04g58590	MGG_14824	RNA recognition motif containing protein	P-glycoprotein 5	N	N	0.59
LOC_Os05g06190	MGG_14824	expressed protein	P-glycoprotein 5	Y	N	0.545667
LOC_Os01g43180	MGG_14917	MYB family transcription factor	Putative uncharacterized protein	N	N	0.53
LOC_Os02g49986	MGG_14917	MYB family transcription factor	Putative uncharacterized protein	N	N	0.57
LOC_Os06g45720	MGG_14917	BTB/POZ domain containing protein	Putative uncharacterized protein	N	N	0.62
LOC_Os08g41120	MGG_14917	MBTB29 - Bric-a-Brac, Tramtrack, Broad Complex BTB domain with Meprin and TRAF Homology MATH domain	Putative uncharacterized protein	N	N	0.56
LOC_Os09g06890	MGG_14917	BTB/POZ domain containing protein	Putative uncharacterized protein	N	N	0.58
LOC_Os10g29810	MGG_14917	MBTB58 - Bric-a-Brac, Tramtrack, Broad Complex BTB domain with Meprin and TRAF Homology MATH domain	Putative uncharacterized protein	N	N	0.54
LOC_Os10g29850	MGG_14917	MBTB60 - Bric-a-Brac, Tramtrack, Broad Complex BTB domain with Meprin and TRAF Homology MATH domain	Putative uncharacterized protein	N	N	0.558333
LOC_Os11g09270	MGG_14917	ankyrin repeat family protein	Putative uncharacterized protein	N	N	0.56
LOC_Os11g14480	MGG_14917	expressed protein	Putative uncharacterized protein	N	N	0.51
LOC_Os12g12810	MGG_14917	ankyrin repeat family protein	Putative uncharacterized protein	N	N	0.65
LOC_Os01g59930	MGG_14956	NADH-cytochrome b5 reductase	Putative uncharacterized protein	Y	N	0.605
LOC_Os05g40990	MGG_14956	NADH-cytochrome b5 reductase	Putative uncharacterized protein	Y	N	0.615
LOC_Os07g15490	MGG_14966	C2-BTB1 - Bric-a-Brac, Tramtrack, Broad Complex BTB domain with C2 subfamily conserved sequence	Putative uncharacterized protein	N	N	0.58
LOC_Os09g10840	MGG_15047	transcription factor	Major facilitator superfamily transporter	N	N	0.56
LOC_Os09g03610	MGG_15057	flowering time control protein FCA	Putative uncharacterized protein	N	N	0.54
LOC_Os09g39180	MGG_15057	RNA recognition motif containing protein	Putative uncharacterized protein	N	N	0.54
LOC_Os10g30370	MGG_15057	RNA recognition motif containing protein	Putative uncharacterized protein	N	N	0.56
LOC_Os03g22780	MGG_15094	DVR	Acetylcholinesterase	N	N	0.51
LOC_Os03g60740	MGG_15094	expressed protein	Acetylcholinesterase	N	N	0.66
LOC_Os05g01970	MGG_15094	NAD dependent epimerase/dehydratase family protein	Acetylcholinesterase	N	N	0.63
LOC_Os02g45480	MGG_15291	nucleic acid binding protein	Pheromone processing endoprotease KexB	N	N	0.62
LOC_Os03g05210	MGG_15291	WD domain, G-beta repeat domain containing protein	Pheromone processing endoprotease KexB	N	N	0.53
LOC_Os03g18840	MGG_15291	NUC189 domain containing protein	Pheromone processing endoprotease KexB	N	N	0.63
LOC_Os12g19590	MGG_15291	WD domain, G-beta repeat domain containing protein	Pheromone processing endoprotease KexB	N	N	0.683333
LOC_Os01g16350	MGG_15313	hydroxymethylglutaryl-CoA lyase	Ankyrin repeat and protein kinase domain-containing protein 1	N	N	0.57
LOC_Os01g18050	MGG_15313	tubulin/FtsZ domain containing protein	Ankyrin repeat and protein kinase domain-containing protein 1	N	N	0.52
LOC_Os01g19480	MGG_15313	kelch motif family protein	Ankyrin repeat and protein kinase domain-containing protein 1	N	N	0.58
LOC_Os01g59150	MGG_15313	tubulin/FtsZ domain containing protein	Ankyrin repeat and protein kinase domain-containing protein 1	N	N	0.51
LOC_Os02g07060	MGG_15313	tubulin/FtsZ domain containing protein	Ankyrin repeat and protein kinase domain-containing protein 1	N	N	0.52
LOC_Os03g01530	MGG_15313	tubulin/FtsZ domain containing protein	Ankyrin repeat and protein kinase domain-containing protein 1	N	N	0.52
LOC_Os03g47720	MGG_15313	ankyrin	Ankyrin repeat and protein kinase domain-containing protein 1	Y	N	0.53
LOC_Os03g56810	MGG_15313	tubulin/FtsZ domain containing protein	Ankyrin repeat and protein kinase domain-containing protein 1	N	N	0.53
LOC_Os04g45000	MGG_15313	short-chain dehydrogenase/reductase	Ankyrin repeat and protein kinase domain-containing protein 1	N	N	0.54
LOC_Os04g45670	MGG_15313	src homology-3 domain protein 3	Ankyrin repeat and protein kinase domain-containing protein 1	N	N	0.54
LOC_Os04g52580	MGG_15313	tetratricopeptide repeat domain containing protein	Ankyrin repeat and protein kinase domain-containing protein 1	N	N	0.57
LOC_Os05g34170	MGG_15313	tubulin/FtsZ domain containing protein	Ankyrin repeat and protein kinase domain-containing protein 1	N	N	0.53
LOC_Os05g36120	MGG_15313	polypyrimidine tract-binding protein	Ankyrin repeat and protein kinase domain-containing protein 1	N	N	0.58
LOC_Os06g46000	MGG_15313	tubulin/FtsZ domain containing protein	Ankyrin repeat and protein kinase domain-containing protein 1	N	N	0.52
LOC_Os07g27110	MGG_15313	RNA recognition motif containing protein	Ankyrin repeat and protein kinase domain-containing protein 1	N	N	0.63
LOC_Os07g46500	MGG_15313	ankyrin repeat domain containing protein	Ankyrin repeat and protein kinase domain-containing protein 1	Y	N	0.52
LOC_Os08g02130	MGG_15313	RNA recognition motif containing protein	Ankyrin repeat and protein kinase domain-containing protein 1	N	N	0.575
LOC_Os08g38700	MGG_15313	C3-BTB2 - Bric-a-Brac, Tramtrack, Broad Complex BTB domain with C3 subfamily conserved sequence	Ankyrin repeat and protein kinase domain-containing protein 1	N	N	0.62
LOC_Os09g21120	MGG_15313	armadillo/beta-catenin repeat family protein	Ankyrin repeat and protein kinase domain-containing protein 1	N	N	0.57
LOC_Os10g22310	MGG_15313	glutathione S-transferase GST 26	Ankyrin repeat and protein kinase domain-containing protein 1	N	N	0.65
LOC_Os11g40810	MGG_15313	receptor kinase	Ankyrin repeat and protein kinase domain-containing protein 1	N	N	0.54
LOC_Os08g05710	MGG_15334	ABC transporter, ATP-binding protein	Multidrug resistance protein 11	Y	N	0.54
LOC_Os12g03870	MGG_15388	major facilitator superfamily antiporter	Lactose permease	N	N	0.54
LOC_Os09g38690	MGG_15411	transporter family protein	Putative uncharacterized protein	N	N	0.56
LOC_Os07g16960	MGG_15423	glycosyl transferase, group 1 domain containing protein	Putative uncharacterized protein	N	N	0.59
LOC_Os02g48790	MGG_15435	AML1	Putative uncharacterized protein	N	N	0.53
LOC_Os09g38690	MGG_15435	transporter family protein	Putative uncharacterized protein	N	N	0.55
LOC_Os10g30370	MGG_15435	RNA recognition motif containing protein	Putative uncharacterized protein	N	N	0.57
LOC_Os03g25770	MGG_15438	RNA recognition motif containing protein	Membrane transporter	N	N	0.58
LOC_Os11g28610	MGG_15624	transporter family protein	MFS transporter	N	N	0.52
LOC_Os05g50300	MGG_15682	AMP-binding enzyme	Putative uncharacterized protein	Y	N	0.63
LOC_Os03g25770	MGG_15745	RNA recognition motif containing protein	Putative uncharacterized protein	N	N	0.59
LOC_Os01g57470	MGG_15814	EF hand family protein	Peptidyl-prolyl cis-trans isomerase B	N	N	0.52
LOC_Os02g15510	MGG_15814	BED zinc finger family protein	Peptidyl-prolyl cis-trans isomerase B	N	N	0.596667
LOC_Os02g50080	MGG_15814	EF hand family protein	Peptidyl-prolyl cis-trans isomerase B	N	N	0.7
LOC_Os01g07140	MGG_15830	kelch repeat-containing protein	Putative uncharacterized protein	N	N	0.5275
LOC_Os02g21110	MGG_15830	OsFBK6 - F-box domain and kelch repeat containing protein	Putative uncharacterized protein	N	N	0.58
LOC_Os08g42530	MGG_15830	SFC	Putative uncharacterized protein	N	N	0.54
LOC_Os09g07460	MGG_15830	kelch repeat protein	Putative uncharacterized protein	N	N	0.52
LOC_Os05g01240	MGG_15866	AML1	Putative uncharacterized protein	N	N	0.61
LOC_Os02g37290	MGG_15972	heavy metal associated domain containing protein	AVR-Pik	N	N	0.528333
LOC_Os02g37300	MGG_15972	heavy metal associated domain containing protein	AVR-Pik	N	N	0.505
LOC_Os02g37320	MGG_15972	heavy metal associated domain containing protein	AVR-Pik	N	N	0.563333
LOC_Os04g39380	MGG_15972	heavy metal transport/detoxification protein	AVR-Pik	N	N	0.563333
LOC_Os03g56280	MGG_16083	lactate/malate dehydrogenase	Putative uncharacterized protein	N	N	0.508881
LOC_Os09g39180	MGG_16096	RNA recognition motif containing protein	Putative uncharacterized protein	N	N	0.54
LOC_Os02g13970	MGG_16133	Complex I intermediate-associated protein 30 domain containing protein	Putative uncharacterized protein	N	N	0.63
LOC_Os05g22614	MGG_16133	PTAC16	Putative uncharacterized protein	N	N	0.65
LOC_Os01g12520	MGG_16149	mitochondrial carrier protein	ADP,ATP carrier protein	Y	N	0.6
LOC_Os06g40050	MGG_16149	mitochondrial carrier protein	ADP,ATP carrier protein	Y	N	0.58
LOC_Os01g73370	MGG_16997	S-locus lectin protein kinase family protein	Putative uncharacterized protein	N	N	0.59
LOC_Os02g57010	MGG_16997	RNA recognition motif containing protein	Putative uncharacterized protein	N	N	0.52
LOC_Os05g23800	MGG_16997	RNA recognition motif containing protein	Putative uncharacterized protein	N	N	0.64
LOC_Os08g02330	MGG_16997	RNA recognition motif containing protein	Putative uncharacterized protein	N	N	0.6
LOC_Os10g06800	MGG_16997	cyclin-dependent kinase G-2	Putative uncharacterized protein	N	N	0.53
LOC_Os01g24010	MGG_17054	pleiotropic drug resistance protein	Putative uncharacterized protein	Y	N	0.59
LOC_Os01g42380	MGG_17054	pleiotropic drug resistance protein	Putative uncharacterized protein	Y	N	0.59
LOC_Os01g42410	MGG_17054	pleiotropic drug resistance protein	Putative uncharacterized protein	Y	N	0.61
LOC_Os02g11760	MGG_17054	pleiotropic drug resistance protein	Putative uncharacterized protein	Y	N	0.64
LOC_Os08g07010	MGG_17054	ABC-2 type transporter domain containing protein	Putative uncharacterized protein	Y	N	0.56
LOC_Os09g16290	MGG_17054	ABC-2 type transporter	Putative uncharacterized protein	Y	N	0.7
LOC_Os09g16380	MGG_17054	pleiotropic drug resistance protein	Putative uncharacterized protein	Y	N	0.71
LOC_Os09g23640	MGG_17054	ABC-2 type transporter domain containing protein	Putative uncharacterized protein	Y	N	0.73
LOC_Os11g37700	MGG_17054	pleiotropic drug resistance protein	Putative uncharacterized protein	Y	N	0.66
LOC_Os03g03680	MGG_17097	transporter family protein	Putative uncharacterized protein	N	N	0.58
LOC_Os05g15770	MGG_17154	glycosyl hydrolase	Putative uncharacterized protein	Y	N	0.513333
LOC_Os05g15880	MGG_17154	glycosyl hydrolase	Putative uncharacterized protein	Y	N	0.513333
LOC_Os08g40690	MGG_17154	glycosyl hydrolase	Putative uncharacterized protein	Y	N	0.513333
LOC_Os11g47500	MGG_17154	glycosyl hydrolase	Putative uncharacterized protein	Y	N	0.513333
LOC_Os11g47510	MGG_17154	glycosyl hydrolase	Putative uncharacterized protein	Y	N	0.523333
LOC_Os11g47580	MGG_17154	glycosyl hydrolase	Putative uncharacterized protein	Y	N	0.523333
LOC_Os01g42820	MGG_17301	RNA recognition motif containing protein	Putative uncharacterized protein	N	N	0.74
LOC_Os02g39720	MGG_17301	splicing factor, arginine/serine-rich 7	Putative uncharacterized protein	N	N	0.61
LOC_Os02g48790	MGG_17301	AML1	Putative uncharacterized protein	N	N	0.67
LOC_Os07g47630	MGG_17301	RNA recognition motif containing protein	Putative uncharacterized protein	N	N	0.73
LOC_Os09g03610	MGG_17301	flowering time control protein FCA	Putative uncharacterized protein	N	N	0.61
LOC_Os11g03890	MGG_17301	RNA recognition motif containing protein	Putative uncharacterized protein	N	N	0.78
LOC_Os01g04990	MGG_17450	mitochondrial carrier protein	Mitochondrial 2-oxoglutarate/malate carrier protein	Y	N	0.55
LOC_Os01g12520	MGG_17450	mitochondrial carrier protein	Mitochondrial 2-oxoglutarate/malate carrier protein	Y	N	0.63
LOC_Os01g22600	MGG_17450	mitochondrial carrier protein	Mitochondrial 2-oxoglutarate/malate carrier protein	Y	N	0.56
LOC_Os01g38990	MGG_17450	mitochondrial carrier protein	Mitochondrial 2-oxoglutarate/malate carrier protein	Y	N	0.56
LOC_Os01g70800	MGG_17450	mitochondrial carrier protein	Mitochondrial 2-oxoglutarate/malate carrier protein	Y	N	0.55
LOC_Os01g73420	MGG_17450	mitochondrial carrier protein	Mitochondrial 2-oxoglutarate/malate carrier protein	Y	N	0.57
LOC_Os02g44570	MGG_17450	mitochondrial carrier protein	Mitochondrial 2-oxoglutarate/malate carrier protein	Y	N	0.56
LOC_Os02g48720	MGG_17450	mitochondrial carrier protein	Mitochondrial 2-oxoglutarate/malate carrier protein	Y	N	0.56
LOC_Os03g09110	MGG_17450	mitochondrial carrier protein	Mitochondrial 2-oxoglutarate/malate carrier protein	Y	N	0.54
LOC_Os03g15690	MGG_17450	phosphate carrier protein, mitochondrial precursor	Mitochondrial 2-oxoglutarate/malate carrier protein	Y	N	0.55
LOC_Os03g15860	MGG_17450	mitochondrial carrier protein	Mitochondrial 2-oxoglutarate/malate carrier protein	Y	N	0.56
LOC_Os03g18550	MGG_17450	mitochondrial carrier protein	Mitochondrial 2-oxoglutarate/malate carrier protein	Y	N	0.58
LOC_Os04g44540	MGG_17450	mitochondrial carrier protein	Mitochondrial 2-oxoglutarate/malate carrier protein	Y	N	0.52
LOC_Os05g07900	MGG_17450	mitochondrial carrier protein	Mitochondrial 2-oxoglutarate/malate carrier protein	Y	N	0.56
LOC_Os05g23720	MGG_17450	mitochondrial carrier protein	Mitochondrial 2-oxoglutarate/malate carrier protein	Y	N	0.56
LOC_Os05g29860	MGG_17450	mitochondrial carrier protein	Mitochondrial 2-oxoglutarate/malate carrier protein	Y	N	0.56
LOC_Os08g40850	MGG_17450	mitochondrial carrier protein	Mitochondrial 2-oxoglutarate/malate carrier protein	Y	N	0.58
LOC_Os09g32200	MGG_17450	mitochondrial carrier protein	Mitochondrial 2-oxoglutarate/malate carrier protein	Y	N	0.55
LOC_Os10g25830	MGG_17450	mitochondrial carrier protein	Mitochondrial 2-oxoglutarate/malate carrier protein	Y	N	0.58
LOC_Os11g43960	MGG_17450	mitochondrial carrier protein	Mitochondrial 2-oxoglutarate/malate carrier protein	Y	N	0.56
LOC_Os02g44300	MGG_17677	MSP domain containing protein	Putative uncharacterized protein	N	N	0.52
LOC_Os08g05890	MGG_17677	MSP domain containing protein	Putative uncharacterized protein	N	N	0.57
LOC_Os05g49230	MGG_17732	ribosomal RNA large subunit methyltransferase J	Putative uncharacterized protein	N	N	0.53
LOC_Os01g74340	MGG_17803	RNA recognition motif containing protein	Putative uncharacterized protein	N	N	0.52
LOC_Os03g25770	MGG_17803	RNA recognition motif containing protein	Putative uncharacterized protein	N	N	0.6
LOC_Os06g12210	MGG_17803	helix-loop-helix DNA-binding domain containing protein	Putative uncharacterized protein	N	N	0.54
LOC_Os08g37960	MGG_17803	RNA recognition motif containing protein	Putative uncharacterized protein	N	N	0.54
LOC_Os08g38380	MGG_17803	RNA recognition motif containing protein	Putative uncharacterized protein	N	N	0.53
LOC_Os09g03610	MGG_17803	flowering time control protein FCA	Putative uncharacterized protein	N	N	0.54
LOC_Os10g29470	MGG_17803	dehydrogenase	Putative uncharacterized protein	Y	N	0.53
LOC_Os12g31380	MGG_17803	initiation factor 2 subunit family domain containing protein	Putative uncharacterized protein	N	N	0.7
[truncated: 20 more rows]
